# Supplementary material for: Validation of the inventory of Callous-Unemotional Traits among school-going adolescents in Malaysia
Source: PLoS One. 2023 Feb 16;18(2):e0276724. doi: 10.1371/journal.pone.0276724 (PMC9934360; doi:10.1371/journal.pone.0276724)
Supplement: S1 Data — (XLSX) [file pone.0276724.s002.xlsx]

## Sheet: EFA
ID	Gender	Ethnic	Age	Occ_Father	Father_cat	Occ_Mother	Mother_cat	Occ_Guardian	Monthly_income	Parents_marital	Educ_Father	Educ_Mother	Educ_Guardian	No_siblings	FH_Mental	Fam_Mental	FH_Forensic	Fam_Forensic	FH_Jailed	Fam_jailed	FH_Chronic	Fam_illness	Fam_inV	Q1	Q2	Q3	Q4	Q5	Q6	Q7	Q8	Q9	Q10	Q11	Q12	Q13	Q14	Q15	Q16	Q17	Q18	Q19	Q20	Q21	Q22	Q23	Q24
132	FEMALE	Chinese	16	MECHANIC	PRIVATE STAFF	HOUSEWIFE	HOUSEWIFE	NOT AVAILABLE	9	M	SS	SS	NOT AVAILABLE	1	NO	NOT AVAILABLE	NO	NOT AVAILABLE	NO	NOT AVAILABLE	NO	NOT AVAILABLE	NOT AVAILABLE	1	1	3	1	3	2	0	3	0	1	0	0	2	1	3	2	3	3	0	0	2	1	3	1
34	MALE	Chinese	14	LORRY DRIVER	PRIVATE STAFF	HOUSEWIFE	HOUSEWIFE	NOT AVAILABLE	1500	M	SS	SS	NOT AVAILABLE	1	NO	NOT AVAILABLE	NO	NOT AVAILABLE	NO	NOT AVAILABLE	YES	FATHER	NOT AVAILABLE	2	2	3	0	2	2	0	3	0	2	0	0	2	1	3	3	3	0	2	0	0	0	3	3
1	FEMALE	Chinese	13	NOT AVAILABLE	NOT AVAILABLE	HOUSEWIFE	HOUSEWIFE	NOT AVAILABLE	1800	S	SS	DIP	NOT AVAILABLE	1	NO	NOT AVAILABLE	NO	NOT AVAILABLE	NO	NOT AVAILABLE	NO	NOT AVAILABLE	NOT AVAILABLE	2	2	1	1	2	2	3	2	1	2	2	3	3	2	1	1	2	3	2	1	2	3	1	1
82	MALE	Malay	15	SELF-EMPLOYED	SELF-EMPLOYED	HOUSEWIFE	HOUSEWIFE	NOT AVAILABLE	2000	M	NOT AVAILABLE	DIP	NOT AVAILABLE	1	NO	NOT AVAILABLE	NO	NOT AVAILABLE	NO	NOT AVAILABLE	NO	NOT AVAILABLE	NOT AVAILABLE	2	1	2	0	3	1	0	2	1	1	1	0	2	1	2	2	2	0	1	0	0	0	2	3
142	FEMALE	Chinese	16	NOT AVAILABLE	NOT AVAILABLE	HAWKER	PRIVATE STAFF	HOUSEWIFE	2000	D	NOT AVAILABLE	SS	PS	1	NO	NOT AVAILABLE	NO	NOT AVAILABLE	NO	NOT AVAILABLE	NO	NOT AVAILABLE	NOT AVAILABLE	2	1	2	0	3	1	0	2	0	2	1	1	1	1	1	3	3	0	1	1	0	1	1	3
27	FEMALE	Chinese	14	PENSIONER	PENSIONER	HOUSEWIFE	HOUSEWIFE	NOT AVAILABLE	2000	M	SS	SS	NOT AVAILABLE	1	NO	NOT AVAILABLE	NO	NOT AVAILABLE	NO	NOT AVAILABLE	NO	NOT AVAILABLE	NOT AVAILABLE	2	1	2	0	2	0	0	1	0	0	0	1	2	3	2	3	2	0	1	0	0	1	1	2
143	MALE	Chinese	16	TECHNICIAN	PRIVATE STAFF	HOUSEWIFE	HOUSEWIFE	NOT AVAILABLE	2000	M	SS	SS	NOT AVAILABLE	1	NO	NOT AVAILABLE	NO	NOT AVAILABLE	NO	NOT AVAILABLE	NO	NOT AVAILABLE	NOT AVAILABLE	2	1	1	0	2	1	1	2	0	99	1	1	1	1	1	2	2	1	1	0	1	1	2	2
221	FEMALE	Malay	16	PASSED AWAY	PASSED AWAY	OFFICER	GOVERNMENT SERVANT	NOT AVAILABLE	2000	P	NOT AVAILABLE	DEG	NOT AVAILABLE	1	NO	NOT AVAILABLE	NO	NOT AVAILABLE	NO	NOT AVAILABLE	NO	NOT AVAILABLE	NOT AVAILABLE	0	0	3	0	3	1	0	3	0	1	3	3	2	2	2	3	3	0	1	0	0	2	2	3
152	FEMALE	Malay	16	PENSIONER	RETIREE	PENSIONER	RETIREE	NOT AVAILABLE	2500	M	SS	SS	NOT AVAILABLE	1	NO	NOT AVAILABLE	NO	NOT AVAILABLE	NO	NOT AVAILABLE	YES	BOTH PARENT	HYPERTENSION	3	3	3	0	3	3	0	2	0	0	1	2	3	0	3	3	3	0	2	0	0	3	3	3
137	FEMALE	Chinese	16	HAWKER	SELF-EMPLOYED	HAWKER	PRIVATE STAFF	NOT AVAILABLE	2800	M	SS	SS	NOT AVAILABLE	1	NO	NOT AVAILABLE	NO	NOT AVAILABLE	NO	NOT AVAILABLE	NO	NOT AVAILABLE	NOT AVAILABLE	2	0	2	0	1	2	0	3	0	1	0	1	1	0	3	2	3	0	1	1	0	1	1	1
351	MALE	Chinese	13	BAUXITE MINER	PRIVATE STAFF	SALESWOMAN	PRIVATE STAFF	NOT AVAILABLE	3000	M	DIP	DIP	NOT AVAILABLE	1	NO	NOT AVAILABLE	NO	NOT AVAILABLE	NO	NOT AVAILABLE	NO	NOT AVAILABLE	NOT AVAILABLE	3	3	2	1	3	2	2	0	3	0	0	0	0	0	1	2	1	3	3	0	0	1	2	0
279	MALE	Malay	14	UNEMPLOYED	UNEMPLOYED	UNEMPLOYED	UNEMPLOYED	SAILOR	3000	M	DEG	DEG	DEG	1	NO	NOT AVAILABLE	NO	NOT AVAILABLE	NO	NOT AVAILABLE	NO	NOT AVAILABLE	NOT AVAILABLE	1	2	2	0	3	3	0	3	0	2	0	1	2	0	3	2	2	0	0	0	0	2	2	3
178	FEMALE	Chinese	14	SELF-EMPLOYED	SELF-EMPLOYED	SALESWOMAN	PRIVATE STAFF	NOT AVAILABLE	3000	M	SS	SS	NOT AVAILABLE	1	NO	NOT AVAILABLE	NO	NOT AVAILABLE	NO	NOT AVAILABLE	NO	NOT AVAILABLE	NOT AVAILABLE	3	1	99	99	2	0	0	2	0	2	1	0	3	1	99	3	3	2	2	1	0	2	2	3
352	MALE	Chinese	14	BAUXITE MINER	PRIVATE STAFF	SALESWOMAN	PRIVATE STAFF	NOT AVAILABLE	3500	D	SS	NOT AVAILABLE	NOT AVAILABLE	1	NO	NOT AVAILABLE	NO	NOT AVAILABLE	NO	NOT AVAILABLE	NO	NOT AVAILABLE	NOT AVAILABLE	0	1	2	0	1	2	0	2	1	3	2	1	0	1	1	3	2	0	1	2	2	1	3	1
23	FEMALE	Chinese	14	SUPERVISOR	PRIVATE STAFF	HOUSEWIFE	HOUSEWIFE	NOT AVAILABLE	3800	M	SS	SS	NOT AVAILABLE	1	NO	NOT AVAILABLE	NO	NOT AVAILABLE	NO	NOT AVAILABLE	NO	NOT AVAILABLE	NOT AVAILABLE	1	2	2	0	3	1	0	3	0	2	0	0	3	1	2	3	3	1	1	2	0	3	2	2
158	FEMALE	Chinese	14	BUSSINESSMAN	BUSINESSMAN	BUSSINESSMAN	BUSINESSMAN	NOT AVAILABLE	4000	D	SS	SS	NOT AVAILABLE	1	NO	NOT AVAILABLE	NO	NOT AVAILABLE	NO	NOT AVAILABLE	YES	NOT AVAILABLE	ASTHMA	2	2	3	0	3	2	0	3	1	1	2	1	2	0	2	3	3	0	0	2	0	0	3	2
298	MALE	Chinese	15	MECHANIC	PRIVATE STAFF	HOUSEWIFE	HOUSEWIFE	NOT AVAILABLE	4000	M	SS	SS	NOT AVAILABLE	1	NO	NOT AVAILABLE	NO	NOT AVAILABLE	NO	NOT AVAILABLE	YES	STUDENT	G6PD	0	2	1	1	3	3	1	3	0	2	0	3	2	0	2	2	3	0	1	0	0	3	2	3
154	MALE	Chinese	16	SELF-EMPLOYED	SELF-EMPLOYED	CLERK	GOVERNMENT SERVANT	NOT AVAILABLE	7000	M	SS	SS	NOT AVAILABLE	1	NO	NOT AVAILABLE	NO	NOT AVAILABLE	NO	NOT AVAILABLE	NO	NOT AVAILABLE	NOT AVAILABLE	1	0	1	0	2	1	0	2	0	1	1	0	1	1	2	2	1	0	1	1	0	1	2	3
406	MALE	Malay	16	TECHNICIAN	PRIVATE STAFF	MANAGER	PRIVATE STAFF	NOT AVAILABLE	8000	M	DEG	DEG	NOT AVAILABLE	1	NO	NOT AVAILABLE	NO	NOT AVAILABLE	NO	NOT AVAILABLE	NO	NOT AVAILABLE	NOT AVAILABLE	1	2	3	0	3	3	0	2	0	1	0	0	1	2	3	3	3	0	1	0	0	2	3	3
136	FEMALE	Chinese	16	HAWKER	SELF-EMPLOYED	HAWKER	PRIVATE STAFF	NOT AVAILABLE	9	M	DIP	DIP	NOT AVAILABLE	2	NO	NOT AVAILABLE	NO	NOT AVAILABLE	NO	NOT AVAILABLE	NO	NOT AVAILABLE	NOT AVAILABLE	2	2	3	0	3	1	1	2	0	1	2	0	3	2	3	2	3	1	2	1	0	2	3	2
167	FEMALE	Chinese	13	NOT AVAILABLE	NOT AVAILABLE	NOT AVAILABLE	NOT AVAILABLE	NOT AVAILABLE	9	M	SS	SS	NOT AVAILABLE	2	NO	NOT AVAILABLE	NO	NOT AVAILABLE	NO	NOT AVAILABLE	NO	NOT AVAILABLE	NOT AVAILABLE	0	1	0	1	0	2	0	1	1	0	0	0	2	0	1	3	3	0	0	2	0	0	1	0
360	FEMALE	IBAN	13	LABORER	PRIVATE STAFF	HOUSEWIFE	HOUSEWIFE	NOT AVAILABLE	1200	M	PS	SS	NOT AVAILABLE	2	NO	NOT AVAILABLE	NO	NOT AVAILABLE	NO	NOT AVAILABLE	NO	NOT AVAILABLE	NOT AVAILABLE	1	2	1	0	0	0	0	0	0	0	0	0	0	1	0	0	0	0	0	0	0	0	0	0
107	FEMALE	Malay	15	SELF-EMPLOYED	SELF-EMPLOYED	HOUSEWIFE	HOUSEWIFE	NOT AVAILABLE	1200	M	SS	SS	NOT AVAILABLE	2	NO	NOT AVAILABLE	YES	FATHER	YES	FATHER	YES	FATHER	NOT AVAILABLE	0	1	3	1	3	2	0	3	0	2	0	0	1	0	3	3	1	0	0	0	0	3	2	2
124	FEMALE	Malay	16	PASSED AWAY	PASSED AWAY	CHEF	PRIVATE STAFF	NOT AVAILABLE	1200	P	NOT AVAILABLE	SS	NOT AVAILABLE	2	NO	NOT AVAILABLE	NO	NOT AVAILABLE	NO	NOT AVAILABLE	YES	FATHER	NOT AVAILABLE	1	0	2	0	3	1	0	2	0	2	0	0	2	2	2	1	1	0	2	0	0	2	1	2
394	MALE	Indian	14	CLEANER	PRIVATE STAFF	NOT AVAILABLE	NOT AVAILABLE	CLEANER	2000	D	PS	NOT AVAILABLE	PS	2	NO	NOT AVAILABLE	NO	NOT AVAILABLE	NO	NOT AVAILABLE	NO	NOT AVAILABLE	NOT AVAILABLE	1	1	3	2	3	0	0	3	0	0	0	0	1	0	1	3	1	0	1	0	0	1	2	3
47	MALE	Chinese	14	MECHANIC	PRIVATE STAFF	CLERK	GOVERNMENT SERVANT	NOT AVAILABLE	2100	M	SS	SS	NOT AVAILABLE	2	NO	NOT AVAILABLE	NO	NOT AVAILABLE	NO	NOT AVAILABLE	YES	MOTHER	HYPERTENSION	2	1	3	0	3	2	0	3	1	1	0	0	3	1	3	3	3	0	1	1	0	3	2	2
359	FEMALE	IBAN	13	LABORER	PRIVATE STAFF	HOUSEWIFE	HOUSEWIFE	NOT AVAILABLE	2300	M	SS	SS	NOT AVAILABLE	2	NO	NOT AVAILABLE	NO	NOT AVAILABLE	NO	NOT AVAILABLE	NO	NOT AVAILABLE	NOT AVAILABLE	1	2	1	0	0	0	0	0	0	0	0	0	0	1	2	3	3	3	3	0	3	0	1	3
49	MALE	Indian	14	SECURITY GUARD	PRIVATE STAFF	SECURITY GUARD	PRIVATE STAFF	NOT AVAILABLE	2400	M	SS	PS	NOT AVAILABLE	2	NO	NOT AVAILABLE	NO	NOT AVAILABLE	NO	NOT AVAILABLE	NO	NOT AVAILABLE	NOT AVAILABLE	1	0	0	0	3	0	1	2	0	2	0	0	2	3	2	2	1	0	0	2	1	0	2	3
56	MALE	Chinese	15	LORRY DRIVER	PRIVATE STAFF	HOUSEWIFE	HOUSEWIFE	NOT AVAILABLE	3000	M	PS	SS	NOT AVAILABLE	2	NO	NOT AVAILABLE	NO	NOT AVAILABLE	NO	NOT AVAILABLE	NO	NOT AVAILABLE	NOT AVAILABLE	0	0	0	0	0	0	0	0	0	1	0	0	0	1	1	3	0	0	1	1	0	2	2	3
157	MALE	Chinese	14	SALESMAN	PRIVATE STAFF	HOUSEWIFE	HOUSEWIFE	NOT AVAILABLE	3000	M	SS	SS	NOT AVAILABLE	2	NO	NOT AVAILABLE	NO	NOT AVAILABLE	NO	NOT AVAILABLE	NO	NOT AVAILABLE	NOT AVAILABLE	0	1	2	0	2	0	0	2	1	0	0	0	0	2	3	0	1	0	3	2	0	1	3	1
75	FEMALE	Chinese	16	HAWKER	SELF-EMPLOYED	HAWKER	PRIVATE STAFF	NOT AVAILABLE	3000	M	SS	SS	NOT AVAILABLE	2	NO	NOT AVAILABLE	NO	NOT AVAILABLE	NO	NOT AVAILABLE	NO	NOT AVAILABLE	NOT AVAILABLE	2	1	3	2	1	1	0	2	0	2	0	1	1	0	3	2	2	0	1	0	0	0	2	2
183	FEMALE	Chinese	13	SALESMAN	PRIVATE STAFF	HOUSEWIFE	HOUSEWIFE	NOT AVAILABLE	3000	M	SS	SS	NOT AVAILABLE	2	NO	NOT AVAILABLE	NO	NOT AVAILABLE	NO	NOT AVAILABLE	NO	NOT AVAILABLE	NOT AVAILABLE	1	0	1	0	3	1	1	2	0	1	0	0	0	2	1	2	2	1	2	1	1	2	1	1
181	FEMALE	Chinese	13	MANAGER	PRIVATE STAFF	HOUSEWIFE	HOUSEWIFE	NOT AVAILABLE	3000	M	DIP	SS	NOT AVAILABLE	2	NO	NOT AVAILABLE	NO	NOT AVAILABLE	NO	NOT AVAILABLE	NO	NOT AVAILABLE	NOT AVAILABLE	2	1	1	0	1	0	0	99	1	1	0	0	0	2	2	3	2	1	1	3	0	1	2	2
40	FEMALE	Chinese	14	HAWKER	SELF-EMPLOYED	HOUSEWIFE	HOUSEWIFE	NOT AVAILABLE	3000	D	DEG	DEG	NOT AVAILABLE	2	NO	NOT AVAILABLE	NO	NOT AVAILABLE	NO	NOT AVAILABLE	NO	NOT AVAILABLE	NOT AVAILABLE	1	1	2	0	3	2	0	2	1	1	1	0	3	2	3	2	3	0	1	1	0	1	1	1
14	MALE	Malay	16	BUSINESSMAN	BUSINESSMAN	HOUSEWIFE	HOUSEWIFE	NOT AVAILABLE	3000	M	SS	SS	NOT AVAILABLE	2	NO	NOT AVAILABLE	NO	NOT AVAILABLE	NO	NOT AVAILABLE	YES	FATHER	HYPERTENSION	2	0	3	0	3	1	0	3	0	3	0	0	2	2	3	3	3	0	1	0	0	3	3	2
3	MALE	Chinese	13	LORRY DRIVER	PRIVATE STAFF	HOUSEWIFE	HOUSEWIFE	NOT AVAILABLE	3000	M	SS	SS	NOT AVAILABLE	2	NO	NOT AVAILABLE	NO	NOT AVAILABLE	NO	NOT AVAILABLE	YES	MOTHER	HYPERTENSION	2	2	1	0	2	1	1	1	2	1	0	0	2	1	1	2	0	0	1	0	1	1	0	2
215	FEMALE	Malay	16	PASSED AWAY	PASSED AWAY	SELF EMPLOY	SELF-EMPLOYED	NOT AVAILABLE	3000	P	DIP	SS	DEG	2	NO	NOT AVAILABLE	NO	NOT AVAILABLE	NO	NOT AVAILABLE	NO	NOT AVAILABLE	NOT AVAILABLE	0	1	3	1	3	3	0	3	0	1	0	1	3	0	3	1	3	0	1	0	0	3	3	2
179	FEMALE	Chinese	13	BLACKSMITH	PRIVATE STAFF	HOUSEWIFE	HOUSEWIFE	NOT AVAILABLE	3000	S	PS	SS	NOT AVAILABLE	2	NO	NOT AVAILABLE	NO	NOT AVAILABLE	NO	NOT AVAILABLE	NO	NOT AVAILABLE	NOT AVAILABLE	0	0	0	0	3	3	0	3	1	0	3	1	0	0	0	3	2	1	0	2	0	3	1	1
356	MALE	Chinese	13	SALESMAN	PRIVATE STAFF	FLORIST	PRIVATE STAFF	NOT AVAILABLE	3500	M	DEG	DEG	NOT AVAILABLE	2	NO	NOT AVAILABLE	NO	NOT AVAILABLE	NO	NOT AVAILABLE	NO	NOT AVAILABLE	NOT AVAILABLE	3	3	1	1	3	0	0	0	0	0	0	0	0	0	0	0	0	0	0	0	0	0	0	0
153	FEMALE	Chinese	16	NOT AVAILABLE	NOT AVAILABLE	SELLER	PRIVATE STAFF	NOT AVAILABLE	4000	D	NOT AVAILABLE	SS	NOT AVAILABLE	2	NOT AVAILABLE	NOT AVAILABLE	NOT AVAILABLE	NOT AVAILABLE	NOT AVAILABLE	NOT AVAILABLE	NOT AVAILABLE	NOT AVAILABLE	NOT AVAILABLE	1	1	1	0	0	1	1	0	1	2	3	2	1	0	2	1	2	1	0	0	1	1	1	2
35	FEMALE	Chinese	14	NOT AVAILABLE	NOT AVAILABLE	CLERK	GOVERNMENT SERVANT	NOT AVAILABLE	4000	M	PS	SS	NOT AVAILABLE	2	NO	NOT AVAILABLE	NO	NOT AVAILABLE	NO	NOT AVAILABLE	NO	NOT AVAILABLE	NOT AVAILABLE	2	0	3	0	3	2	0	2	0	2	1	0	3	2	2	2	2	0	0	0	1	1	1	2
19	MALE	Chinese	16	GENERAL WORKER	GOVERNMENT SERVANT	GENERAL WORKER	GOVERNMENT SERVANT	NOT AVAILABLE	4000	M	SS	SS	NOT AVAILABLE	2	NO	NOT AVAILABLE	NO	NOT AVAILABLE	NO	NOT AVAILABLE	NO	NOT AVAILABLE	NOT AVAILABLE	1	1	0	0	3	1	0	2	1	1	2	2	1	2	2	3	2	0	2	3	0	1	3	2
144	MALE	Chinese	16	SUPERVISOR	PRIVATE STAFF	HOUSEWIFE	HOUSEWIFE	NOT AVAILABLE	4000	M	PS	SS	NOT AVAILABLE	2	NO	NOT AVAILABLE	NO	NOT AVAILABLE	NO	NOT AVAILABLE	YES	FATHER	HYPERTENSION	2	1	3	0	2	2	1	3	0	0	3	0	2	0	3	3	3	0	1	0	0	1	3	3
238	MALE	Malay	13	NOT AVAILABLE	NOT AVAILABLE	GOVERNMENT SERVANT	GOVERNMENT SERVANT	NOT AVAILABLE	4000	M	NOT AVAILABLE	DEG	NOT AVAILABLE	2	NO	NOT AVAILABLE	NO	NOT AVAILABLE	NO	NOT AVAILABLE	NO	NOT AVAILABLE	NOT AVAILABLE	0	1	3	0	3	1	0	3	0	3	0	0	3	0	3	3	3	0	0	0	0	1	3	3
164	MALE	Chinese	13	INSURANCE AGENT	PRIVATE STAFF	HOUSEWIFE	HOUSEWIFE	NOT AVAILABLE	5000	M	SS	SS	NOT AVAILABLE	2	NO	NOT AVAILABLE	NO	NOT AVAILABLE	NO	NOT AVAILABLE	NO	NOT AVAILABLE	NOT AVAILABLE	2	0	1	2	2	0	1	2	1	1	1	1	2	1	1	1	2	1	2	1	1	1	1	2
130	MALE	Chinese	16	HAWKER	SELF-EMPLOYED	HAWKER	PRIVATE STAFF	NOT AVAILABLE	5000	M	SS	SS	NOT AVAILABLE	2	NO	NOT AVAILABLE	NO	NOT AVAILABLE	NO	NOT AVAILABLE	YES	FATHER	HYPERTENSION	1	1	2	0	2	3	2	2	0	1	0	0	0	0	3	2	0	0	1	0	0	3	2	1
267	MALE	Malay	14	JKR OFFICER	GOVERNMENT SERVANT	FORESTRY WORKER	GOVERNMENT SERVANT	NOT AVAILABLE	5000	M	PS	SS	NOT AVAILABLE	2	NO	NOT AVAILABLE	NO	NOT AVAILABLE	NO	NOT AVAILABLE	NO	NOT AVAILABLE	NOT AVAILABLE	2	2	2	0	0	2	0	2	1	2	0	0	1	1	2	2	2	1	2	0	0	2	2	2
15	MALE	Malay	16	SALESMAN	PRIVATE STAFF	CLERK	GOVERNMENT SERVANT	NOT AVAILABLE	5500	M	SS	SS	NOT AVAILABLE	2	NO	NOT AVAILABLE	NO	NOT AVAILABLE	NO	NOT AVAILABLE	NO	NOT AVAILABLE	NOT AVAILABLE	3	3	3	0	3	0	0	3	0	3	0	1	3	0	3	3	3	0	3	0	0	0	2	3
372	FEMALE	Chinese	14	MECHANIC	PRIVATE STAFF	CLERK	GOVERNMENT SERVANT	NOT AVAILABLE	5500	D	SS	SS	NOT AVAILABLE	2	NO	NOT AVAILABLE	NO	NOT AVAILABLE	NO	NOT AVAILABLE	NO	NOT AVAILABLE	NOT AVAILABLE	2	1	1	1	2	1	0	3	0	1	0	0	3	1	1	2	2	0	1	0	0	2	1	1
59	FEMALE	Indian	14	TECHNICIAN	PRIVATE STAFF	TEACHER	GOVERNMENT SERVANT	NOT AVAILABLE	6000	M	SS	SS	NOT AVAILABLE	2	NO	NOT AVAILABLE	NO	NOT AVAILABLE	NO	NOT AVAILABLE	NO	NOT AVAILABLE	NOT AVAILABLE	0	2	1	2	0	2	3	2	0	1	1	0	2	1	3	3	2	1	1	0	2	3	0	3
102	MALE	Chinese	15	BUSSINESSMAN	BUSINESSMAN	NOT AVAILABLE	NOT AVAILABLE	NOT AVAILABLE	6000	M	SS	SS	NOT AVAILABLE	2	NO	NOT AVAILABLE	NO	NOT AVAILABLE	NO	NOT AVAILABLE	NO	NOT AVAILABLE	NOT AVAILABLE	2	2	3	2	2	1	0	3	0	1	2	1	1	0	3	2	3	0	0	1	1	0	3	2
149	MALE	Chinese	16	BUSSINESSMAN	BUSINESSMAN	TEACHER	GOVERNMENT SERVANT	NOT AVAILABLE	8000	M	SS	DIP	NOT AVAILABLE	2	NO	NOT AVAILABLE	NO	NOT AVAILABLE	NO	NOT AVAILABLE	NO	NOT AVAILABLE	NOT AVAILABLE	2	1	1	0	3	1	1	2	1	2	2	1	1	2	1	2	3	0	2	1	0	1	2	2
202	FEMALE	Malay	16	BANKER	PRIVATE STAFF	HOUSEWIFE	HOUSEWIFE	NOT AVAILABLE	8000	M	SS	SS	NOT AVAILABLE	2	NO	NOT AVAILABLE	NO	NOT AVAILABLE	NO	NOT AVAILABLE	NO	NOT AVAILABLE	NOT AVAILABLE	0	1	2	0	3	1	0	2	0	2	0	0	1	0	2	3	2	0	0	0	0	2	1	3
377	FEMALE	Chinese	13	BUSINESSMAN	BUSINESSMAN	GENERAL WORKER	GOVERNMENT SERVANT	NOT AVAILABLE	10000	M	SS	DIP	NOT AVAILABLE	2	NO	NOT AVAILABLE	NO	NOT AVAILABLE	NO	NOT AVAILABLE	NO	NOT AVAILABLE	NOT AVAILABLE	0	1	3	0	3	3	0	2	0	2	3	0	1	0	3	2	0	0	2	1	0	2	3	1
18	MALE	Chinese	17	BANK MANAGER	PRIVATE STAFF	HOUSEWIFE	HOUSEWIFE	NOT AVAILABLE	10000	M	DIP	DIP	NOT AVAILABLE	2	NO	NOT AVAILABLE	NO	NOT AVAILABLE	NO	NOT AVAILABLE	YES	FATHER	NOT AVAILABLE	3	1	2	0	3	0	0	2	0	1	0	0	3	1	2	3	0	0	1	1	2	2	3	3
306	FEMALE	Malay	15	PETRONAS EXECUTIVE	PRIVATE STAFF	HOUSEWIFE	HOUSEWIFE	NOT AVAILABLE	10500	M	DIP	SS	NOT AVAILABLE	2	NO	NOT AVAILABLE	NO	NOT AVAILABLE	NO	NOT AVAILABLE	NO	NOT AVAILABLE	NOT AVAILABLE	1	2	3	0	3	1	0	3	0	1	0	0	1	0	3	2	3	0	1	0	0	1	3	3
378	MALE	Malay	15	DOCTOR	GOVERNMENT SERVANT	DOCTOR	GOVERNMENT SERVANT	NOT AVAILABLE	15000	M	PG	PG	NOT AVAILABLE	2	NO	NOT AVAILABLE	NO	NOT AVAILABLE	NO	NOT AVAILABLE	NO	NOT AVAILABLE	NOT AVAILABLE	0	1	1	0	1	0	0	1	0	2	1	0	2	1	1	2	1	0	0	0	0	3	1	1
239	FEMALE	Malay	13	SECURITY GUARD	PRIVATE STAFF	HOUSEWIFE	HOUSEWIFE	HOUSEWIFE	9	D	DIP	SS	NOT AVAILABLE	3	NO	NOT AVAILABLE	NO	NOT AVAILABLE	NO	NOT AVAILABLE	NO	NOT AVAILABLE	NOT AVAILABLE	1	2	2	2	2	3	1	2	3	1	2	0	1	0	2	1	0	0	0	2	1	1	2	3
282	MALE	Malay	15	TEACHER	GOVERNMENT SERVANT	TEACHER	GOVERNMENT SERVANT	NOT AVAILABLE	9	M	DEG	DEG	NOT AVAILABLE	3	NO	NOT AVAILABLE	NO	NOT AVAILABLE	NO	NOT AVAILABLE	NO	NOT AVAILABLE	NOT AVAILABLE	0	1	3	0	2	1	0	2	0	2	0	0	1	0	2	2	2	0	0	0	0	1	2	2
32	MALE	Chinese	14	NOT AVAILABLE	NOT AVAILABLE	NOT AVAILABLE	NOT AVAILABLE	NOT AVAILABLE	9	M	DEG	DEG	NOT AVAILABLE	3	NO	NOT AVAILABLE	NO	NOT AVAILABLE	NO	NOT AVAILABLE	NO	NOT AVAILABLE	NOT AVAILABLE	1	1	2	2	2	2	3	2	1	2	2	1	1	3	3	3	3	1	2	1	1	2	3	2
162	FEMALE	Chinese	14	NOT AVAILABLE	NOT AVAILABLE	NOT AVAILABLE	NOT AVAILABLE	NOT AVAILABLE	9	M	SS	SS	NOT AVAILABLE	3	NO	NOT AVAILABLE	NO	NOT AVAILABLE	NO	NOT AVAILABLE	NO	NOT AVAILABLE	NOT AVAILABLE	1	1	1	1	2	1	1	3	0	1	1	0	1	2	1	2	0	2	0	1	0	0	3	1
156	FEMALE	Chinese	14	NOT AVAILABLE	NOT AVAILABLE	ACCOUNTANT	PRIVATE STAFF	NOT AVAILABLE	9	D	NOT AVAILABLE	DIP	NOT AVAILABLE	3	NO	NOT AVAILABLE	NO	NOT AVAILABLE	NO	NOT AVAILABLE	YES	FATHER	HYPERTENSION	0	2	1	0	1	2	2	3	2	2	1	1	1	1	1	2	3	1	0	0	0	3	1	2
289	MALE	Indian	15	NOT AVAILABLE	NOT AVAILABLE	BABYSITTER	SELF-EMPLOYED	NOT AVAILABLE	350	NOT AVAILABLE	PS	SS	NOT AVAILABLE	3	NO	NOT AVAILABLE	NO	NOT AVAILABLE	NO	NOT AVAILABLE	NO	NOT AVAILABLE	NOT AVAILABLE	3	0	1	99	1	0	0	3	1	3	2	0	2	0	3	3	2	0	0	0	0	0	0	3
67	FEMALE	Malay	14	SELF-EMPLOYED	SELF-EMPLOYED	HOUSEWIFE	HOUSEWIFE	NOT AVAILABLE	1200	M	DEG	SS	NOT AVAILABLE	3	NO	NOT AVAILABLE	NO	NOT AVAILABLE	YES	FATHER	NO	NOT AVAILABLE	NOT AVAILABLE	0	1	3	2	3	2	0	2	0	3	3	1	2	0	3	2	3	2	1	0	2	1	3	2
155	FEMALE	Chinese	14	TOURIST GUIDE	GOVERNMENT SERVANT	BOSS	SELF-EMPLOYED	NOT AVAILABLE	1500	D	DIP	DEG	NOT AVAILABLE	3	NO	NOT AVAILABLE	NO	NOT AVAILABLE	NO	NOT AVAILABLE	NO	NOT AVAILABLE	NOT AVAILABLE	1	0	3	0	3	3	1	2	0	1	1	2	0	0	2	3	3	0	1	1	0	2	3	3
29	FEMALE	Chinese	14	MECHANIC	PRIVATE STAFF	HOUSEWIFE	HOUSEWIFE	NOT AVAILABLE	2000	M	DIP	SS	NOT AVAILABLE	3	NO	NOT AVAILABLE	NO	NOT AVAILABLE	NO	NOT AVAILABLE	NO	NOT AVAILABLE	NOT AVAILABLE	1	1	2	0	1	1	0	3	0	1	0	1	1	1	3	3	2	2	1	0	0	1	3	2
86	FEMALE	Malay	16	HAWKER	SELF-EMPLOYED	HAWKER	PRIVATE STAFF	NOT AVAILABLE	2000	M	SS	SS	NOT AVAILABLE	3	NO	NOT AVAILABLE	NO	NOT AVAILABLE	NO	NOT AVAILABLE	NO	NOT AVAILABLE	NOT AVAILABLE	1	1	2	0	3	1	2	1	0	3	0	1	2	0	2	2	3	0	0	0	0	1	1	3
316	MALE	Malay	15	TAXI DRIVER	PRIVATE STAFF	CLERK	GOVERNMENT SERVANT	NOT AVAILABLE	2000	M	SS	DIP	NOT AVAILABLE	3	NO	NOT AVAILABLE	NO	NOT AVAILABLE	NO	NOT AVAILABLE	NO	NOT AVAILABLE	NOT AVAILABLE	1	1	3	1	3	2	0	3	1	1	0	0	2	1	3	3	3	0	1	0	0	2	3	3
278	FEMALE	Indian	15	LORRY DRIVER	PRIVATE STAFF	HOUSEWIFE	HOUSEWIFE	NOT AVAILABLE	2500	M	DIP	SS	NOT AVAILABLE	3	NO	NOT AVAILABLE	NO	NOT AVAILABLE	NO	NOT AVAILABLE	YES	PARENTS	NOT AVAILABLE	1	2	2	0	1	1	0	2	1	2	99	0	2	2	3	3	2	0	1	0	1	0	3	3
261	MALE	Malay	14	SELF-EMPLOYED	SELF-EMPLOYED	CLERK	GOVERNMENT SERVANT	NOT AVAILABLE	3000	M	SS	DIP	NOT AVAILABLE	3	NO	NOT AVAILABLE	NO	NOT AVAILABLE	NO	NOT AVAILABLE	NO	NOT AVAILABLE	NOT AVAILABLE	1	2	1	0	3	0	0	2	0	0	1	0	1	0	3	2	3	0	1	2	0	0	3	2
36	FEMALE	Chinese	14	SUPERVISOR	PRIVATE STAFF	HOUSEWIFE	HOUSEWIFE	NOT AVAILABLE	3000	M	SS	SS	NOT AVAILABLE	3	NO	NOT AVAILABLE	NO	NOT AVAILABLE	NO	NOT AVAILABLE	NO	NOT AVAILABLE	NOT AVAILABLE	0	0	3	0	2	3	1	2	0	1	0	0	0	0	3	1	3	0	0	0	0	0	3	2
361	FEMALE	Chinese	13	TRACTOR DRIVER	PRIVATE STAFF	HOUSEWIFE	HOUSEWIFE	NOT AVAILABLE	3000	S	DIP	DIP	NOT AVAILABLE	3	NO	NOT AVAILABLE	NO	NOT AVAILABLE	NO	NOT AVAILABLE	NO	NOT AVAILABLE	NOT AVAILABLE	1	1	2	1	1	2	1	1	1	1	1	1	1	1	2	1	1	1	1	2	1	1	2	1
114	FEMALE	Chinese	16	WELDER	PRIVATE STAFF	NOT AVAILABLE	NOT AVAILABLE	NOT AVAILABLE	3000	D	SS	SS	NOT AVAILABLE	3	NO	NOT AVAILABLE	NO	NOT AVAILABLE	NO	NOT AVAILABLE	NO	NOT AVAILABLE	NOT AVAILABLE	1	1	2	0	2	1	1	2	0	1	0	1	1	1	2	2	1	1	0	1	0	3	2	1
12	MALE	Indian	16	LORRY DRIVER	PRIVATE STAFF	HOUSEWIFE	HOUSEWIFE	NOT AVAILABLE	3000	M	PS	SS	NOT AVAILABLE	3	NO	NOT AVAILABLE	NO	NOT AVAILABLE	NO	NOT AVAILABLE	NO	NOT AVAILABLE	NOT AVAILABLE	2	3	3	3	3	0	0	2	0	3	0	3	1	2	3	3	3	1	0	0	0	2	3	3
249	MALE	Malay	14	SELF-EMPLOYED	SELF-EMPLOYED	CLERK	GOVERNMENT SERVANT	NOT AVAILABLE	3000	M	SS	SS	NOT AVAILABLE	3	NO	NOT AVAILABLE	NO	NOT AVAILABLE	NO	NOT AVAILABLE	NO	NOT AVAILABLE	NOT AVAILABLE	2	1	2	0	2	1	1	2	0	2	3	0	1	1	3	2	3	0	1	1	1	1	1	2
135	FEMALE	Chinese	15	HAWKER	SELF-EMPLOYED	ACCOUNTANT	PRIVATE STAFF	NOT AVAILABLE	3000	M	DEG	SS	NOT AVAILABLE	3	NO	NOT AVAILABLE	NO	NOT AVAILABLE	NO	NOT AVAILABLE	NO	NOT AVAILABLE	NOT AVAILABLE	2	1	2	1	2	1	0	2	1	1	2	0	1	1	2	2	1	1	1	1	1	1	2	2
364	MALE	Malay	13	MECHANIC	PRIVATE STAFF	MPK WORKER	GOVERNMENT SERVANT	NOT AVAILABLE	3000	M	SS	SS	NOT AVAILABLE	3	NO	NOT AVAILABLE	NO	NOT AVAILABLE	NO	NOT AVAILABLE	NO	NOT AVAILABLE	NOT AVAILABLE	0	1	2	0	2	3	0	2	0	0	0	0	2	1	2	2	2	0	0	0	0	2	2	2
38	FEMALE	Chinese	14	HAWKER	SELF-EMPLOYED	CLERK	GOVERNMENT SERVANT	NOT AVAILABLE	3000	M	SS	SS	NOT AVAILABLE	3	NO	NOT AVAILABLE	NO	NOT AVAILABLE	NO	NOT AVAILABLE	NO	NOT AVAILABLE	NOT AVAILABLE	2	99	2	0	3	1	0	2	0	2	3	0	2	1	2	3	3	0	1	0	1	1	3	3
396	MALE	Malay	14	HAWKER	SELF-EMPLOYED	HAIRDRESSER	PRIVATE STAFF	NOT AVAILABLE	3000	M	DIP	DIP	NOT AVAILABLE	3	YES	AUNT	NO	NOT AVAILABLE	NO	NOT AVAILABLE	YES	GRANDMOTHER	HYPERTENSION; DIABETES	2	0	3	0	0	0	0	3	0	0	0	0	2	0	3	3	3	0	0	0	0	3	2	3
273	MALE	Malay	15	SELF-EMPLOYED	SELF-EMPLOYED	CLERK	GOVERNMENT SERVANT	NOT AVAILABLE	3500	D	DIP	PG	NOT AVAILABLE	3	NO	NOT AVAILABLE	YES	PARENTS	NO	NOT AVAILABLE	NO	NOT AVAILABLE	NOT AVAILABLE	1	2	1	0	2	1	0	2	1	1	3	0	2	1	3	2	1	0	2	0	0	3	3	3
10	FEMALE	Chinese	13	CHEF	PRIVATE STAFF	HOUSEWIFE	HOUSEWIFE	NOT AVAILABLE	3500	M	SS	SS	NOT AVAILABLE	3	NO	NOT AVAILABLE	NO	NOT AVAILABLE	NO	NOT AVAILABLE	NO	NOT AVAILABLE	NOT AVAILABLE	2	1	1	0	1	1	0	2	1	1	1	0	1	1	1	0	1	0	1	0	0	2	1	2
63	FEMALE	Malay	14	PASSED AWAY	PASSED AWAY	NURSE	GOVERNMENT SERVANT	NOT AVAILABLE	4000	P	DIP	DIP	NOT AVAILABLE	3	NO	NOT AVAILABLE	NO	NOT AVAILABLE	NO	NOT AVAILABLE	NO	NOT AVAILABLE	NOT AVAILABLE	1	2	2	0	1	3	0	3	0	0	0	0	1	0	3	1	3	0	1	0	0	3	1	3
90	FEMALE	Chinese	16	HAWKER	SELF-EMPLOYED	HAWKER	PRIVATE STAFF	NOT AVAILABLE	4000	M	SS	SS	NOT AVAILABLE	3	NO	NOT AVAILABLE	NO	NOT AVAILABLE	NO	NOT AVAILABLE	YES	BOTH PARENT	NOT AVAILABLE	1	1	2	1	2	1	1	2	0	1	2	2	1	1	3	2	2	1	0	0	1	1	3	3
320	FEMALE	Malay	15	CLERK	GOVERNMENT SERVANT	BUSINESSMAN	BUSINESSMAN	NOT AVAILABLE	4000	M	SS	SS	NOT AVAILABLE	3	NO	NOT AVAILABLE	NO	NOT AVAILABLE	NO	NOT AVAILABLE	NO	NOT AVAILABLE	NOT AVAILABLE	1	2	3	0	3	1	0	3	0	3	1	2	3	0	3	3	3	0	2	2	0	2	2	3
299	MALE	Malay	15	BANKER	PRIVATE STAFF	SALESWOMAN	PRIVATE STAFF	NOT AVAILABLE	5000	M	SS	SS	NOT AVAILABLE	3	NO	NOT AVAILABLE	NO	NOT AVAILABLE	NO	NOT AVAILABLE	NO	NOT AVAILABLE	NOT AVAILABLE	3	3	2	0	3	3	0	3	0	2	0	0	3	0	3	3	3	0	0	0	1	3	3	3
121	MALE	IBAN	15	SUPERVISOR	PRIVATE STAFF	HOUSEWIFE	HOUSEWIFE	NOT AVAILABLE	5000	M	SS	SS	NOT AVAILABLE	3	NO	NOT AVAILABLE	NO	NOT AVAILABLE	NO	NOT AVAILABLE	YES	MOTHER	NOT AVAILABLE	1	1	3	0	2	1	1	2	0	1	0	0	2	0	2	2	2	0	0	0	0	2	2	3
408	MALE	Malay	15	MEDICAL ASSISTANT	GOVERNMENT SERVANT	CIVIL SERVANT	GOVERNMENT SERVANT	NOT AVAILABLE	5000	M	DIP	SS	NOT AVAILABLE	3	NO	NOT AVAILABLE	NO	NOT AVAILABLE	NO	NOT AVAILABLE	NO	NOT AVAILABLE	NOT AVAILABLE	3	3	3	3	3	2	0	3	3	3	99	0	3	3	3	3	3	0	3	0	0	1	3	3
163	FEMALE	Chinese	14	MANAGER	PRIVATE STAFF	HOUSEWIFE	HOUSEWIFE	NOT AVAILABLE	5000	M	DIP	DIP	NOT AVAILABLE	3	NO	NOT AVAILABLE	NO	NOT AVAILABLE	NO	NOT AVAILABLE	NO	NOT AVAILABLE	NOT AVAILABLE	2	0	3	0	3	1	0	3	2	2	1	2	2	1	3	3	3	1	1	0	0	2	2	3
37	FEMALE	Chinese	14	HAWKER	SELF-EMPLOYED	ACCOUNTANT	PRIVATE STAFF	NOT AVAILABLE	5500	M	SS	SS	NOT AVAILABLE	3	NO	NOT AVAILABLE	NO	NOT AVAILABLE	NO	NOT AVAILABLE	NO	NOT AVAILABLE	NOT AVAILABLE	2	0	3	0	2	0	0	2	0	2	0	0	3	1	3	3	3	0	1	0	0	1	2	1
246	MALE	Malay	13	TEACHER	GOVERNMENT SERVANT	TEACHER	GOVERNMENT SERVANT	NOT AVAILABLE	6000	D	DIP	PG	NOT AVAILABLE	3	NO	NOT AVAILABLE	NO	NOT AVAILABLE	NO	NOT AVAILABLE	NO	NOT AVAILABLE	NOT AVAILABLE	0	0	0	2	2	2	0	2	99	3	0	0	0	0	3	3	3	0	0	0	0	3	3	3
85	FEMALE	Malay	15	SELF-EMPLOYED	SELF-EMPLOYED	NURSE	GOVERNMENT SERVANT	NOT AVAILABLE	7000	M	SS	DIP	NOT AVAILABLE	3	NO	NOT AVAILABLE	NO	NOT AVAILABLE	NO	NOT AVAILABLE	NO	NOT AVAILABLE	NOT AVAILABLE	1	3	2	0	3	1	0	3	0	2	1	0	1	1	3	3	3	0	0	0	0	2	2	3
39	FEMALE	Chinese	14	MANAGER	PRIVATE STAFF	BANKER	PRIVATE STAFF	NOT AVAILABLE	8000	M	DIP	DIP	NOT AVAILABLE	3	NO	NOT AVAILABLE	NO	NOT AVAILABLE	NO	NOT AVAILABLE	NO	NOT AVAILABLE	NOT AVAILABLE	1	1	2	0	2	1	1	2	0	0	1	0	1	1	2	3	3	0	1	1	0	3	1	2
262	FEMALE	Malay	14	USTAZ	SELF-EMPLOYED	JKR OFFICER	GOVERNMENT SERVANT	NOT AVAILABLE	9000	M	DEG	DIP	NOT AVAILABLE	3	NO	NOT AVAILABLE	NO	NOT AVAILABLE	NO	NOT AVAILABLE	YES	FATHER	HYPERTENSION	1	2	2	0	1	1	0	2	0	2	2	0	1	1	2	2	2	0	0	0	0	0	2	2
297	FEMALE	Malay	15	CONTRACTOR	SELF-EMPLOYED	NURSE	GOVERNMENT SERVANT	NOT AVAILABLE	10000	M	NOT AVAILABLE	DIP	NOT AVAILABLE	3	NO	NOT AVAILABLE	NO	NOT AVAILABLE	NO	NOT AVAILABLE	NO	NOT AVAILABLE	NOT AVAILABLE	1	1	1	0	3	1	0	2	2	1	0	99	2	0	3	1	3	0	0	0	0	1	3	3
308	MALE	Malay	15	ACCOUNTANT	PRIVATE STAFF	TEACHER	GOVERNMENT SERVANT	NOT AVAILABLE	15000	M	PG	DEG	NOT AVAILABLE	3	NO	NOT AVAILABLE	NO	NOT AVAILABLE	NO	NOT AVAILABLE	NO	NOT AVAILABLE	NOT AVAILABLE	0	3	3	0	3	3	0	3	3	1	1	1	3	0	3	3	1	0	0	0	1	3	3	2
203	FEMALE	Malay	16	SURVEYOR	PRIVATE STAFF	LECTURER	GOVERNMENT SERVANT	NOT AVAILABLE	16000	M	DEG	DEG	NOT AVAILABLE	3	NO	NOT AVAILABLE	NO	NOT AVAILABLE	NO	NOT AVAILABLE	NO	NOT AVAILABLE	NOT AVAILABLE	0	1	2	0	3	3	0	3	1	3	0	0	2	0	2	2	3	0	0	0	0	3	3	3
204	FEMALE	Malay	16	MANAGER	PRIVATE STAFF	HOUSEWIFE	HOUSEWIFE	NOT AVAILABLE	25000	M	DEG	DIP	NOT AVAILABLE	3	NO	NOT AVAILABLE	NO	NOT AVAILABLE	NO	NOT AVAILABLE	NO	NOT AVAILABLE	NOT AVAILABLE	1	2	3	0	2	1	0	2	0	0	0	0	3	1	3	3	3	0	0	0	0	2	2	2
242	MALE	Malay	13	MECHANIC	PRIVATE STAFF	HOUSEWIFE	HOUSEWIFE	NOT AVAILABLE	1000	M	DIP	SS	NOT AVAILABLE	4	NO	NOT AVAILABLE	NO	NOT AVAILABLE	NO	NOT AVAILABLE	NO	NOT AVAILABLE	NOT AVAILABLE	1	0	3	1	3	2	0	1	0	2	0	0	2	0	3	2	3	0	1	0	0	1	3	3
277	FEMALE	Malay	15	NOT AVAILABLE	NOT AVAILABLE	PROMOTER	PRIVATE STAFF	WARDEN	1200	M	SS	SS	DIP	4	NO	NOT AVAILABLE	NO	NOT AVAILABLE	NO	NOT AVAILABLE	NO	NOT AVAILABLE	NOT AVAILABLE	1	2	2	0	2	2	0	1	0	1	2	0	1	0	1	2	2	0	0	0	99	2	2	2
401	FEMALE	Malay	13	CLERK	GOVERNMENT SERVANT	HOUSEWIFE	HOUSEWIFE	NOT AVAILABLE	1200	M	SS	SS	NOT AVAILABLE	4	NO	NOT AVAILABLE	NO	NOT AVAILABLE	NO	NOT AVAILABLE	NO	NOT AVAILABLE	NOT AVAILABLE	0	0	3	0	0	1	0	3	0	2	0	0	2	0	3	2	2	0	0	0	0	1	3	3
66	FEMALE	Malay	14	SELF-EMPLOYED	SELF-EMPLOYED	HOUSEWIFE	HOUSEWIFE	NOT AVAILABLE	1400	D	NOT AVAILABLE	SS	NOT AVAILABLE	4	NO	NOT AVAILABLE	NO	NOT AVAILABLE	NO	NOT AVAILABLE	NO	NOT AVAILABLE	NOT AVAILABLE	0	1	1	0	3	2	0	1	1	3	1	0	2	0	2	3	3	0	1	0	0	3	1	3
60	FEMALE	Malay	14	SELF-EMPLOYED	SELF-EMPLOYED	HOUSEWIFE	HOUSEWIFE	NOT AVAILABLE	1600	M	DIP	SS	NOT AVAILABLE	4	NO	NOT AVAILABLE	NO	NOT AVAILABLE	NO	NOT AVAILABLE	NO	NOT AVAILABLE	NOT AVAILABLE	1	1	3	0	3	3	0	3	0	2	1	0	2	1	3	3	3	0	1	0	0	3	3	3
120	MALE	Malay	16	NOT AVAILABLE	NOT AVAILABLE	BUSSINESSMAN	BUSINESSMAN	NOT AVAILABLE	1800	M	SS	SS	NOT AVAILABLE	4	NO	NOT AVAILABLE	NO	NOT AVAILABLE	NO	NOT AVAILABLE	NO	NOT AVAILABLE	NOT AVAILABLE	2	1	2	0	3	1	0	2	0	2	0	0	1	2	3	2	2	0	0	2	0	2	2	2
108	FEMALE	Malay	15	GOVERNMENT SERVANT	GOVERNMENT SERVANT	HOUSEWIFE	HOUSEWIFE	NOT AVAILABLE	1800	M	SS	DIP	NOT AVAILABLE	4	NO	NOT AVAILABLE	NO	NOT AVAILABLE	NO	NOT AVAILABLE	YES	MOTHER	NOT AVAILABLE	0	1	3	0	1	2	0	3	0	0	0	0	1	1	3	2	2	0	0	0	0	1	2	3
78	FEMALE	Indian	15	MECHANIC	PRIVATE STAFF	NOT AVAILABLE	NOT AVAILABLE	NOT AVAILABLE	2000	M	SS	SS	NOT AVAILABLE	4	NO	NOT AVAILABLE	NO	NOT AVAILABLE	NO	NOT AVAILABLE	NO	NOT AVAILABLE	NOT AVAILABLE	0	2	1	2	0	2	3	2	0	1	2	0	2	1	3	3	2	0	1	2	1	3	0	3
5	MALE	Chinese	13	SELF-EMPLOYED	SELF-EMPLOYED	SELF EMPLOY	SELF-EMPLOYED	NOT AVAILABLE	2500	M	SS	SS	NOT AVAILABLE	4	NO	NOT AVAILABLE	NO	NOT AVAILABLE	NO	NOT AVAILABLE	NO	NOT AVAILABLE	NOT AVAILABLE	2	1	2	0	3	1	0	3	0	2	1	0	2	1	2	3	1	0	1	2	0	1	3	3
77	FEMALE	Malay	16	LORRY DRIVER	PRIVATE STAFF	PROMOTER	PRIVATE STAFF	NOT AVAILABLE	2600	M	SS	SS	NOT AVAILABLE	4	NO	NOT AVAILABLE	NO	NOT AVAILABLE	NO	NOT AVAILABLE	YES	MOTHER	ASTHMA	2	1	2	1	3	1	2	2	0	1	1	0	1	2	2	1	2	0	2	1	0	0	2	3
191	MALE	Malay	13	LORRY DRIVER	PRIVATE STAFF	CLERK	GOVERNMENT SERVANT	NOT AVAILABLE	2900	M	DIP	DIP	NOT AVAILABLE	4	NO	NOT AVAILABLE	NO	NOT AVAILABLE	NO	NOT AVAILABLE	NO	NOT AVAILABLE	NOT AVAILABLE	1	1	2	0	3	0	0	3	1	0	2	0	1	2	2	3	2	0	0	0	0	1	2	3
9	MALE	Chinese	13	BUSINESSMAN	BUSINESSMAN	HOUSEWIFE	HOUSEWIFE	NOT AVAILABLE	3000	M	SS	SS	NOT AVAILABLE	4	NO	NOT AVAILABLE	NO	NOT AVAILABLE	NO	NOT AVAILABLE	NO	NOT AVAILABLE	NOT AVAILABLE	0	3	0	3	1	3	1	0	2	1	3	3	0	0	1	0	3	3	0	2	3	3	1	0
166	FEMALE	Chinese	14	FARMER	PRIVATE STAFF	AUDITOR	PRIVATE STAFF	NOT AVAILABLE	3000	M	SS	SS	NOT AVAILABLE	4	NO	NOT AVAILABLE	NO	NOT AVAILABLE	NO	NOT AVAILABLE	YES	MOTHER	HYPERTENSION	3	1	2	0	3	2	1	2	0	2	0	0	1	3	3	3	1	0	3	2	0	3	1	3
100	MALE	Malay	15	DRIVER	GOVERNMENT SERVANT	GOVERNMENT SERVANT	GOVERNMENT SERVANT	NOT AVAILABLE	3000	M	SS	SS	NOT AVAILABLE	4	NO	NOT AVAILABLE	NO	NOT AVAILABLE	NO	NOT AVAILABLE	YES	FATHER	NOT AVAILABLE	1	0	2	0	3	1	0	2	0	1	0	0	2	1	3	3	2	0	0	0	0	1	2	3
333	FEMALE	Malay	15	JPJ OFFICER	GOVERNMENT SERVANT	HOUSEWIFE	HOUSEWIFE	NOT AVAILABLE	3000	M	DIP	DIP	NOT AVAILABLE	4	NO	NOT AVAILABLE	NO	NOT AVAILABLE	NO	NOT AVAILABLE	NO	NOT AVAILABLE	NOT AVAILABLE	1	2	3	0	2	1	0	2	0	1	0	0	1	1	2	2	1	0	1	0	0	1	2	2
150	MALE	Chinese	16	HAWKER	SELF-EMPLOYED	HAWKER	PRIVATE STAFF	NOT AVAILABLE	3500	M	SS	SS	NOT AVAILABLE	4	NO	NOT AVAILABLE	NO	NOT AVAILABLE	NO	NOT AVAILABLE	NO	NOT AVAILABLE	NOT AVAILABLE	2	3	1	0	3	2	1	2	1	2	2	3	3	1	2	3	3	0	2	1	1	2	2	2
296	MALE	Malay	15	SALESREP	PRIVATE STAFF	ENGINEER	PRIVATE STAFF	NOT AVAILABLE	4000	M	DIP	DEG	NOT AVAILABLE	4	NO	NOT AVAILABLE	NO	NOT AVAILABLE	NO	NOT AVAILABLE	YES	MOTHER	HYPERTENSION	1	1	2	0	1	1	0	2	0	1	0	0	1	1	2	2	0	0	1	0	0	1	2	2
295	MALE	Malay	15	GRAB DRIVER	SELF-EMPLOYED	JPN OFFICER	GOVERNMENT SERVANT	NOT AVAILABLE	4500	M	DIP	DIP	NOT AVAILABLE	4	NO	NOT AVAILABLE	NO	NOT AVAILABLE	NO	NOT AVAILABLE	NO	NOT AVAILABLE	NOT AVAILABLE	1	1	2	0	3	2	0	2	0	0	2	0	1	1	3	2	3	0	1	0	0	2	2	3
194	FEMALE	Malay	16	ENGINEER	PRIVATE STAFF	HOUSEWIFE	HOUSEWIFE	NOT AVAILABLE	5800	M	DIP	SS	NOT AVAILABLE	4	NO	NOT AVAILABLE	NO	NOT AVAILABLE	NO	NOT AVAILABLE	NO	NOT AVAILABLE	NOT AVAILABLE	0	0	2	0	2	2	0	2	0	2	2	2	2	0	3	2	2	0	0	0	0	2	1	2
74	FEMALE	Malay	16	TECHNICIAN	PRIVATE STAFF	HOUSEWIFE	HOUSEWIFE	NOT AVAILABLE	6000	M	DEG	SS	NOT AVAILABLE	4	NO	NOT AVAILABLE	NO	NOT AVAILABLE	NO	NOT AVAILABLE	NO	NOT AVAILABLE	NOT AVAILABLE	0	1	1	0	2	2	1	1	1	1	2	2	1	0	1	0	2	1	0	1	1	3	1	2
384	FEMALE	Malay	15	TECHNICIAN	PRIVATE STAFF	TEACHER	GOVERNMENT SERVANT	NOT AVAILABLE	6000	M	DIP	PG	NOT AVAILABLE	4	NO	NOT AVAILABLE	NO	NOT AVAILABLE	NO	NOT AVAILABLE	NO	NOT AVAILABLE	NOT AVAILABLE	0	1	2	0	3	0	0	2	0	0	0	0	2	1	3	3	3	0	0	0	0	2	3	2
346	MALE	Malay	15	TECHNICIAN	PRIVATE STAFF	HOUSEWIFE	HOUSEWIFE	NOT AVAILABLE	7000	M	DIP	DEG	NOT AVAILABLE	4	NO	NOT AVAILABLE	NO	NOT AVAILABLE	NO	NOT AVAILABLE	YES	FATHER	NOT AVAILABLE	2	1	2	1	3	2	1	2	1	3	0	0	1	1	3	1	3	1	1	1	1	2	2	2
256	FEMALE	Malay	14	EDUCATION OFFICER	GOVERNMENT SERVANT	HOUSEWIFE	HOUSEWIFE	NOT AVAILABLE	8000	M	PG	SS	NOT AVAILABLE	4	NO	NOT AVAILABLE	NO	NOT AVAILABLE	NO	NOT AVAILABLE	NO	NOT AVAILABLE	NOT AVAILABLE	0	1	2	0	3	3	0	3	0	2	0	0	2	1	3	2	3	0	0	0	0	3	2	3
329	FEMALE	Malay	15	CLERK	GOVERNMENT SERVANT	NURSE	GOVERNMENT SERVANT	NOT AVAILABLE	9000	M	SS	DIP	NOT AVAILABLE	4	NO	NOT AVAILABLE	NO	NOT AVAILABLE	NO	NOT AVAILABLE	NO	NOT AVAILABLE	NOT AVAILABLE	1	1	2	0	3	2	0	2	1	2	0	1	1	2	3	2	1	0	1	0	1	2	3	2
17	FEMALE	Malay	16	LECTURER	GOVERNMENT SERVANT	TEACHER	GOVERNMENT SERVANT	NOT AVAILABLE	9000	M	PG	DEG	NOT AVAILABLE	4	NO	NOT AVAILABLE	NO	NOT AVAILABLE	NO	NOT AVAILABLE	NO	NOT AVAILABLE	NOT AVAILABLE	1	0	2	0	3	2	0	2	0	1	0	0	2	1	2	2	3	0	0	0	1	1	2	2
210	MALE	Malay	16	POLICEMAN	GOVERNMENT SERVANT	TEACHER	GOVERNMENT SERVANT	NOT AVAILABLE	10000	M	DEG	PG	NOT AVAILABLE	4	NO	NOT AVAILABLE	NO	NOT AVAILABLE	NO	NOT AVAILABLE	NO	NOT AVAILABLE	NOT AVAILABLE	1	1	2	1	3	1	0	1	0	1	0	0	2	2	2	2	3	0	0	0	0	1	1	2
337	FEMALE	Malay	15	VETERINAR	GOVERNMENT SERVANT	TEACHER	GOVERNMENT SERVANT	NOT AVAILABLE	10000	M	DEG	DEG	NOT AVAILABLE	4	NO	NOT AVAILABLE	NO	NOT AVAILABLE	NO	NOT AVAILABLE	NO	NOT AVAILABLE	NOT AVAILABLE	2	0	3	0	3	1	0	2	0	2	2	1	1	0	3	2	3	0	0	0	0	1	2	2
218	FEMALE	Malay	16	ENGINEER	PRIVATE STAFF	ACCOUNTANT	PRIVATE STAFF	NOT AVAILABLE	15000	M	DEG	DEG	NOT AVAILABLE	4	NO	NOT AVAILABLE	NO	NOT AVAILABLE	NO	NOT AVAILABLE	NO	NOT AVAILABLE	NOT AVAILABLE	1	2	2	3	3	3	1	2	1	3	1	2	1	2	1	2	3	1	0	0	0	3	2	3
73	FEMALE	Malay	16	EXECUTIVE	PRIVATE STAFF	HOUSEWIFE	HOUSEWIFE	NOT AVAILABLE	16000	M	DEG	DEG	NOT AVAILABLE	4	YES	COUSIN	NO	NOT AVAILABLE	NO	NOT AVAILABLE	YES	RESPONDEN	ASTHMA	0	1	1	0	2	3	1	2	0	1	1	1	1	1	2	2	3	1	0	0	0	1	1	2
235	FEMALE	Malay	13	UNEMPLOYED	UNEMPLOYED	HOUSEWIFE	HOUSEWIFE	NOT AVAILABLE	800	D	SS	SS	NOT AVAILABLE	5	NO	NOT AVAILABLE	NO	NOT AVAILABLE	NO	NOT AVAILABLE	NO	NOT AVAILABLE	NOT AVAILABLE	0	0	1	1	2	3	0	3	0	3	0	0	3	0	3	3	0	1	0	3	0	3	3	2
302	MALE	Malay	15	RETIREE	RETIREE	HOUSEWIFE	HOUSEWIFE	NOT AVAILABLE	1100	M	SS	SS	NOT AVAILABLE	5	NO	NOT AVAILABLE	NO	NOT AVAILABLE	NO	NOT AVAILABLE	YES	ELDER SISTER	HEART DISEASE	0	1	1	3	3	1	0	3	1	1	0	0	3	1	2	1	2	0	0	0	0	2	2	2
371	MALE	Malay	13	LABORER	PRIVATE STAFF	HOUSEWIFE	HOUSEWIFE	NOT AVAILABLE	1500	M	SS	SS	NOT AVAILABLE	5	NO	NOT AVAILABLE	NO	NOT AVAILABLE	NO	NOT AVAILABLE	NO	NOT AVAILABLE	NOT AVAILABLE	2	1	3	0	3	3	0	3	0	1	0	1	2	1	3	3	3	0	0	0	3	3	1	2
65	FEMALE	Malay	14	DRIVER	PRIVATE STAFF	HOUSEWIFE	HOUSEWIFE	NOT AVAILABLE	2600	M	SS	PS	NOT AVAILABLE	5	NO	NOT AVAILABLE	NO	NOT AVAILABLE	NO	NOT AVAILABLE	YES	FATHER	NOT AVAILABLE	0	2	3	0	3	3	0	3	0	2	0	0	1	0	3	3	3	0	0	0	0	1	1	3
266	MALE	Malay	14	SECURITY GUARD	PRIVATE STAFF	STALL OPERATOR	PRIVATE STAFF	UNEMPLOYED	3000	M	SS	SS	PS	5	NO	NOT AVAILABLE	NO	NOT AVAILABLE	YES	UNCLE	YES	MOTHER	HYPERTENSION	3	1	2	1	2	1	1	1	2	1	2	1	1	1	3	2	1	0	0	1	0	1	1	1
338	FEMALE	Malay	15	CUSTOMS OFFICER	GOVERNMENT SERVANT	HOUSEWIFE	HOUSEWIFE	NOT AVAILABLE	3000	M	DEG	SS	NOT AVAILABLE	5	NO	NOT AVAILABLE	NO	NOT AVAILABLE	NO	NOT AVAILABLE	YES	FATHER	STROKE	2	0	2	0	0	1	0	0	1	2	1	0	1	1	1	2	2	0	1	2	0	2	2	3
205	FEMALE	Malay	16	CONTRACTOR	SELF-EMPLOYED	BUSSINESSMAN	BUSINESSMAN	NOT AVAILABLE	3000	M	NOT AVAILABLE	NOT AVAILABLE	NOT AVAILABLE	5	NO	NOT AVAILABLE	NO	NOT AVAILABLE	NO	NOT AVAILABLE	NO	NOT AVAILABLE	NOT AVAILABLE	0	1	1	0	3	1	0	1	0	1	0	1	1	1	2	1	3	0	0	0	0	2	1	3
263	MALE	Malay	14	SOLDIER	GOVERNMENT SERVANT	COUNCIL WORKER	GOVERNMENT SERVANT	NOT AVAILABLE	3000	M	SS	SS	NOT AVAILABLE	5	NO	NOT AVAILABLE	NO	NOT AVAILABLE	NO	NOT AVAILABLE	NO	NOT AVAILABLE	NOT AVAILABLE	2	1	0	1	3	2	3	3	2	1	3	1	3	2	2	1	0	1	2	1	0	3	2	3
122	MALE	Malay	16	DRIVER	PRIVATE STAFF	HOUSEWIFE	HOUSEWIFE	NOT AVAILABLE	3100	M	SS	SS	NOT AVAILABLE	5	NO	NOT AVAILABLE	NO	NOT AVAILABLE	NO	NOT AVAILABLE	NO	NOT AVAILABLE	NOT AVAILABLE	1	2	2	0	1	2	0	2	1	2	1	0	1	1	3	3	2	0	0	1	0	2	3	3
317	MALE	Malay	15	RETIREE	RETIREE	CLERK	GOVERNMENT SERVANT	NOT AVAILABLE	4000	M	DEG	DEG	NOT AVAILABLE	5	NO	NOT AVAILABLE	NO	NOT AVAILABLE	NO	NOT AVAILABLE	NO	NOT AVAILABLE	NOT AVAILABLE	0	0	2	0	3	2	1	2	0	3	0	0	3	0	3	2	2	0	0	0	1	3	3	2
177	MALE	Malay	14	TECHNICIAN	PRIVATE STAFF	LAB ASSISTANT	GOVERNMENT SERVANT	NOT AVAILABLE	4000	M	DIP	DIP	NOT AVAILABLE	5	NO	NOT AVAILABLE	NO	NOT AVAILABLE	NO	NOT AVAILABLE	NO	NOT AVAILABLE	NOT AVAILABLE	0	1	1	0	2	1	1	2	2	3	0	0	0	0	3	1	1	0	0	0	0	1	1	3
190	MALE	Malay	14	LORRY DRIVER	PRIVATE STAFF	CLERK	GOVERNMENT SERVANT	NOT AVAILABLE	4000	M	SS	SS	NOT AVAILABLE	5	NO	NOT AVAILABLE	YES	FATHER	NO	NOT AVAILABLE	NO	NOT AVAILABLE	NOT AVAILABLE	0	1	2	2	2	1	0	2	0	1	1	0	1	2	2	2	2	0	0	0	0	1	0	2
54	MALE	Malay	14	ARTIST	PRIVATE STAFF	OFFICER	GOVERNMENT SERVANT	NOT AVAILABLE	4500	M	DEG	DEG	NOT AVAILABLE	5	NO	NOT AVAILABLE	NO	NOT AVAILABLE	NO	NOT AVAILABLE	YES	BROTHER	NOT AVAILABLE	1	1	1	1	2	1	1	2	2	1	1	1	0	0	1	2	1	1	1	1	1	1	2	2
68	MALE	Malay	14	HAWKER	SELF-EMPLOYED	TEACHER	GOVERNMENT SERVANT	NOT AVAILABLE	5000	M	DEG	DEG	NOT AVAILABLE	5	NO	NOT AVAILABLE	NO	NOT AVAILABLE	NO	NOT AVAILABLE	NO	NOT AVAILABLE	NOT AVAILABLE	1	1	1	0	3	0	0	1	0	2	0	0	3	0	1	1	2	0	0	0	1	0	1	3
192	MALE	Malay	13	LABORER	PRIVATE STAFF	LAUNDRY ASSISTANT	PRIVATE STAFF	NOT AVAILABLE	5000	M	SS	SS	NOT AVAILABLE	5	NO	NOT AVAILABLE	NO	NOT AVAILABLE	NO	NOT AVAILABLE	NO	NOT AVAILABLE	NOT AVAILABLE	3	2	3	3	1	1	1	2	0	1	1	0	0	1	3	3	3	0	2	2	0	0	1	3
339	FEMALE	Malay	15	RETIREE ARMY	RETIREE	TEACHER	GOVERNMENT SERVANT	NOT AVAILABLE	6300	D	DIP	DEG	NOT AVAILABLE	5	NO	NOT AVAILABLE	NO	NOT AVAILABLE	NO	NOT AVAILABLE	NO	NOT AVAILABLE	NOT AVAILABLE	0	1	3	0	3	3	1	3	1	1	2	1	1	0	3	3	2	1	0	0	0	3	3	3
311	FEMALE	Malay	15	ENGINEER	PRIVATE STAFF	HOUSEWIFE	HOUSEWIFE	NOT AVAILABLE	7000	M	DEG	SS	NOT AVAILABLE	5	NO	NOT AVAILABLE	NO	NOT AVAILABLE	NO	NOT AVAILABLE	NO	NOT AVAILABLE	NOT AVAILABLE	0	0	3	0	3	2	0	3	0	3	0	0	3	0	3	3	3	0	0	0	0	2	3	3
99	MALE	Malay	16	PENSIONER	PENSIONER	TEACHER	GOVERNMENT SERVANT	NOT AVAILABLE	8000	M	DEG	DEG	NOT AVAILABLE	5	NO	NOT AVAILABLE	NO	NOT AVAILABLE	NO	NOT AVAILABLE	YES	COUSIN	NOT AVAILABLE	1	1	2	0	1	1	0	2	0	0	0	1	1	0	2	1	2	0	0	0	0	0	2	1
237	MALE	Malay	13	ARCHITECT	PRIVATE STAFF	HOUSEWIFE	HOUSEWIFE	NOT AVAILABLE	10000	M	DEG	DEG	NOT AVAILABLE	5	NO	NOT AVAILABLE	NO	NOT AVAILABLE	NO	NOT AVAILABLE	NO	NOT AVAILABLE	NOT AVAILABLE	0	0	3	0	3	0	0	99	2	1	0	0	2	0	3	3	2	3	0	0	0	0	3	3
51	MALE	Malay	14	CLERK	GOVERNMENT SERVANT	HOUSEWIFE	HOUSEWIFE	NOT AVAILABLE	10000	M	DEG	DIP	NOT AVAILABLE	5	NO	NOT AVAILABLE	NO	NOT AVAILABLE	NO	NOT AVAILABLE	NO	NOT AVAILABLE	NOT AVAILABLE	2	1	2	1	2	2	1	3	0	2	0	0	1	2	2	2	1	2	2	1	1	1	2	2
2	FEMALE	Chinese	13	FISHMONGER	PRIVATE STAFF	FISHMONGER	PRIVATE STAFF	NOT AVAILABLE	10000	M	SS	SS	NOT AVAILABLE	5	NO	NOT AVAILABLE	NO	NOT AVAILABLE	NO	NOT AVAILABLE	NO	NOT AVAILABLE	NOT AVAILABLE	0	1	2	0	0	2	0	3	1	0	0	0	0	2	2	1	0	0	1	1	0	2	1	3
224	FEMALE	Malay	16	TEACHER	GOVERNMENT SERVANT	CLERK	GOVERNMENT SERVANT	NOT AVAILABLE	10000	M	DEG	DIP	NOT AVAILABLE	5	NO	NOT AVAILABLE	NO	NOT AVAILABLE	NO	NOT AVAILABLE	YES	SELF	EPILEPSY	2	1	3	0	3	1	0	2	3	1	0	1	2	2	3	3	3	0	1	0	0	1	3	2
269	FEMALE	Malay	14	SELF-EMPLOYED	SELF-EMPLOYED	MANAGER	PRIVATE STAFF	NOT AVAILABLE	10000	M	DEG	DEG	NOT AVAILABLE	5	NO	NOT AVAILABLE	NO	NOT AVAILABLE	NO	NOT AVAILABLE	NO	NOT AVAILABLE	NOT AVAILABLE	0	1	3	0	2	1	1	3	2	1	0	0	2	0	3	2	3	0	1	0	0	3	2	3
319	FEMALE	Malay	15	JUDGE	GOVERNMENT SERVANT	ACCOUNTANT	PRIVATE STAFF	NOT AVAILABLE	12000	M	DEG	PG	NOT AVAILABLE	5	NO	NOT AVAILABLE	NO	NOT AVAILABLE	NO	NOT AVAILABLE	NO	NOT AVAILABLE	NOT AVAILABLE	0	0	2	0	3	2	0	3	0	2	0	1	2	0	3	2	3	0	0	0	0	2	3	2
347	MALE	Malay	15	EDUCATION OFFICER	GOVERNMENT SERVANT	TEACHER	GOVERNMENT SERVANT	NOT AVAILABLE	14000	M	DEG	DEG	NOT AVAILABLE	5	NO	NOT AVAILABLE	NO	NOT AVAILABLE	NO	NOT AVAILABLE	NO	NOT AVAILABLE	NOT AVAILABLE	1	3	3	0	3	1	0	2	0	3	0	0	3	1	3	2	3	0	0	0	0	1	3	3
196	MALE	Malay	16	CONTRACTOR	SELF-EMPLOYED	GOVERNMENT SERVANT	GOVERNMENT SERVANT	NOT AVAILABLE	15000	M	DEG	DIP	NOT AVAILABLE	5	NO	NOT AVAILABLE	NO	NOT AVAILABLE	NO	NOT AVAILABLE	NO	FATHER	HYPERTENSION	1	2	3	0	3	1	0	2	1	2	2	0	2	1	3	3	2	0	1	0	0	2	3	2
251	MALE	Malay	14	DEPUTY DIRECTOR	GOVERNMENT SERVANT	TEACHER	GOVERNMENT SERVANT	NOT AVAILABLE	15000	M	PG	PG	NOT AVAILABLE	5	NO	NOT AVAILABLE	NO	NOT AVAILABLE	NO	NOT AVAILABLE	NO	NOT AVAILABLE	NOT AVAILABLE	0	3	1	3	1	1	1	1	0	3	1	3	1	0	3	1	2	2	1	1	2	3	99	2
260	MALE	Malay	14	ENGINEER	PRIVATE STAFF	HOUSEWIFE	HOUSEWIFE	NOT AVAILABLE	50000	M	DEG	SS	NOT AVAILABLE	5	NO	NOT AVAILABLE	NO	NOT AVAILABLE	NO	NOT AVAILABLE	YES	BROTHER	HEART FAILURE	1	1	3	0	3	1	0	3	2	3	0	0	1	2	2	1	1	0	1	0	0	2	2	3
318	FEMALE	Malay	15	GARDENER	PRIVATE STAFF	HOUSEWIFE	HOUSEWIFE	NOT AVAILABLE	2000	M	SS	PS	NOT AVAILABLE	6	NO	NOT AVAILABLE	NO	NOT AVAILABLE	YES	BROTHER	NO	NOT AVAILABLE	NOT AVAILABLE	1	2	2	0	3	3	0	2	0	3	3	1	2	0	3	2	2	0	1	2	2	3	2	2
87	FEMALE	Malay	16	SELF-EMPLOYED	SELF-EMPLOYED	HOUSEWIFE	HOUSEWIFE	NOT AVAILABLE	2000	M	DIP	DIP	NOT AVAILABLE	6	NO	NOT AVAILABLE	NO	NOT AVAILABLE	NO	NOT AVAILABLE	NO	NOT AVAILABLE	NOT AVAILABLE	1	2	3	1	3	1	0	1	0	1	0	1	3	0	1	1	1	0	0	0	0	2	1	3
366	MALE	Malay	13	POLICEMAN	GOVERNMENT SERVANT	HOUSEWIFE	HOUSEWIFE	NOT AVAILABLE	2000	M	SS	PS	NOT AVAILABLE	6	NO	NOT AVAILABLE	NO	NOT AVAILABLE	NO	NOT AVAILABLE	NO	NOT AVAILABLE	NOT AVAILABLE	0	2	2	0	2	1	0	1	0	0	0	0	2	1	3	2	2	0	0	0	0	1	2	3
402	MALE	Malay	14	NOT AVAILABLE	NOT AVAILABLE	ASSISTANT NURSE	GOVERNMENT SERVANT	NOT AVAILABLE	2200	M	SS	DIP	NOT AVAILABLE	6	NO	NOT AVAILABLE	NO	NOT AVAILABLE	NO	NOT AVAILABLE	NO	NOT AVAILABLE	NOT AVAILABLE	0	99	1	0	3	1	1	2	0	2	3	0	1	0	3	1	2	0	0	0	0	3	1	3
71	FEMALE	Malay	16	TECHNICIAN	PRIVATE STAFF	ASSISTANT	PRIVATE STAFF	NOT AVAILABLE	3000	M	DIP	DIP	NOT AVAILABLE	6	NO	NOT AVAILABLE	NO	NOT AVAILABLE	NO	NOT AVAILABLE	NO	NOT AVAILABLE	NOT AVAILABLE	0	2	2	1	2	1	1	2	0	1	0	0	1	1	2	2	1	0	0	0	0	1	2	1
198	MALE	Indian	16	SPORTS TRAINER	PRIVATE STAFF	HOUSEWIFE	HOUSEWIFE	NOT AVAILABLE	3000	M	SS	SS	NOT AVAILABLE	6	NO	NOT AVAILABLE	NO	NOT AVAILABLE	NO	NOT AVAILABLE	NO	NOT AVAILABLE	NOT AVAILABLE	2	1	3	0	3	1	0	2	0	1	0	0	2	2	3	3	3	0	2	0	1	1	2	2
50	MALE	Malay	14	CLERK	GOVERNMENT SERVANT	OFFICER	GOVERNMENT SERVANT	NOT AVAILABLE	3300	M	DEG	DEG	NOT AVAILABLE	6	NO	NOT AVAILABLE	NO	NOT AVAILABLE	NO	NOT AVAILABLE	NO	NOT AVAILABLE	NOT AVAILABLE	1	2	2	0	2	3	0	2	0	1	0	0	0	1	1	2	2	0	2	0	0	1	2	2
321	FEMALE	Malay	15	MECHANIC	PRIVATE STAFF	CLERK	GOVERNMENT SERVANT	NOT AVAILABLE	3500	M	DIP	DIP	NOT AVAILABLE	6	NO	NOT AVAILABLE	NO	NOT AVAILABLE	NO	NOT AVAILABLE	YES	MOTHER	HYPERTENSION	0	2	1	0	1	2	0	2	0	1	0	0	1	0	2	2	2	0	0	0	0	1	1	1
405	FEMALE	Malay	16	MPK WORKER	GOVERNMENT SERVANT	MPK WORKER	GOVERNMENT SERVANT	NOT AVAILABLE	5000	M	SS	SS	NOT AVAILABLE	6	NO	NOT AVAILABLE	NO	NOT AVAILABLE	NO	NOT AVAILABLE	YES	GRANDMOTHER	HYPERTENSION	2	3	3	0	3	2	0	2	3	1	0	1	2	1	3	3	3	0	1	1	0	3	2	3
395	MALE	Malay	14	PUSPAKOM OFFICER	GOVERNMENT SERVANT	INSURANCE EXECUTIVE	PRIVATE STAFF	NOT AVAILABLE	8000	M	SS	PG	NOT AVAILABLE	6	NO	NOT AVAILABLE	NO	NOT AVAILABLE	NO	NOT AVAILABLE	YES	MOTHER;FATHER,SISTER	HYPERTENSION	0	3	3	0	3	3	0	3	3	3	0	0	3	0	3	3	3	0	0	0	3	3	3	3
326	MALE	Malay	15	OFFSHORE WORKER	PRIVATE STAFF	HOUSEWIFE	HOUSEWIFE	NOT AVAILABLE	9000	M	DIP	SS	NOT AVAILABLE	6	NO	NOT AVAILABLE	NO	NOT AVAILABLE	NO	NOT AVAILABLE	YES	FATHER	DIABETES	1	2	2	0	3	1	0	2	0	2	2	0	1	1	2	3	2	0	1	1	0	1	2	3
314	MALE	Malay	15	ENGINEER	PRIVATE STAFF	TEACHER	GOVERNMENT SERVANT	NOT AVAILABLE	13500	M	DEG	DEG	NOT AVAILABLE	6	NO	NOT AVAILABLE	NO	NOT AVAILABLE	NO	NOT AVAILABLE	NO	NOT AVAILABLE	NOT AVAILABLE	2	1	3	0	1	1	0	3	0	3	0	1	1	1	3	3	2	0	0	0	0	2	2	2
294	MALE	Malay	15	SELF-EMPLOYED	SELF-EMPLOYED	OFFICER	GOVERNMENT SERVANT	NOT AVAILABLE	9	M	NOT AVAILABLE	NOT AVAILABLE	NOT AVAILABLE	7	NO	NOT AVAILABLE	NO	NOT AVAILABLE	NO	NOT AVAILABLE	NO	NOT AVAILABLE	NOT AVAILABLE	0	0	2	0	2	2	0	2	0	1	0	0	1	0	3	2	2	0	0	0	0	1	2	0
58	FEMALE	Malay	14	LORRY DRIVER	PRIVATE STAFF	PROMOTER	PRIVATE STAFF	NOT AVAILABLE	1300	M	SS	PS	NOT AVAILABLE	7	NO	NOT AVAILABLE	NO	NOT AVAILABLE	YES	BROTHER	NO	NOT AVAILABLE	NOT AVAILABLE	2	1	3	0	3	1	0	3	0	1	2	0	2	3	3	3	3	0	1	0	0	0	2	3
323	FEMALE	Malay	15	LORRY DRIVER	PRIVATE STAFF	HOUSEWIFE	HOUSEWIFE	NOT AVAILABLE	2500	M	SS	PS	NOT AVAILABLE	7	NO	NOT AVAILABLE	NO	NOT AVAILABLE	NO	NOT AVAILABLE	YES	MOTHER; FATHER	NOT AVAILABLE	1	1	2	1	2	1	0	1	0	0	0	2	1	1	1	1	1	0	1	0	1	1	1	2
322	FEMALE	Malay	15	RETIREE	RETIREE	KAFA TEACHER	GOVERNMENT SERVANT	NOT AVAILABLE	3500	M	DIP	DIP	NOT AVAILABLE	7	NO	NOT AVAILABLE	NO	NOT AVAILABLE	NO	NOT AVAILABLE	NO	NOT AVAILABLE	NOT AVAILABLE	1	3	2	0	3	3	0	1	2	1	2	3	3	0	2	2	3	0	2	1	1	3	2	3
248	FEMALE	Malay	14	CONTRACTOR	SELF-EMPLOYED	TEACHER	GOVERNMENT SERVANT	NOT AVAILABLE	9800	M	DEG	DEG	NOT AVAILABLE	7	NO	NOT AVAILABLE	NO	NOT AVAILABLE	NO	NOT AVAILABLE	NO	NOT AVAILABLE	NOT AVAILABLE	0	2	3	0	3	2	2	3	0	1	0	2	3	1	3	3	3	3	1	0	0	2	2	3
379	MALE	Malay	15	LAWYER	PRIVATE STAFF	LAWYER	PRIVATE STAFF	NOT AVAILABLE	10000	M	DEG	DEG	NOT AVAILABLE	7	NO	NOT AVAILABLE	NO	NOT AVAILABLE	NO	NOT AVAILABLE	NO	NOT AVAILABLE	NOT AVAILABLE	0	1	3	1	2	3	1	2	99	3	1	2	2	1	2	1	2	1	0	1	1	3	2	3
332	FEMALE	Malay	15	SUPERVISOR	PRIVATE STAFF	HOUSEWIFE	HOUSEWIFE	NOT AVAILABLE	10000	M	DIP	DIP	NOT AVAILABLE	7	NO	NOT AVAILABLE	NO	NOT AVAILABLE	NO	NOT AVAILABLE	YES	MOTHER;SISTER	ASTHMA	1	1	2	0	3	1	0	1	0	1	0	0	0	1	2	1	1	0	0	0	0	1	1	1
213	FEMALE	Malay	16	LECTURER	PRIVATE STAFF	LECTURER	GOVERNMENT SERVANT	NOT AVAILABLE	17000	S	PG	PG	NOT AVAILABLE	7	NO	NOT AVAILABLE	NO	NOT AVAILABLE	NO	NOT AVAILABLE	YES	FATHER ; MOTHER	CANCER ; HYPERTENSION	1	0	2	0	3	1	0	2	1	2	0	1	2	2	1	2	2	0	0	1	1	0	1	2
189	MALE	Malay	14	RETIREE	RETIREE	HOUSEWIFE	HOUSEWIFE	NOT AVAILABLE	1000	S	DIP	SS	NOT AVAILABLE	10	NO	NOT AVAILABLE	NO	NOT AVAILABLE	NO	NOT AVAILABLE	NO	NOT AVAILABLE	NOT AVAILABLE	1	1	2	0	2	1	0	2	2	2	2	0	1	1	2	2	3	0	1	0	0	3	2	3
81	MALE	Malay	15	PENSIONER	PENSIONER	HOUSEWIFE	HOUSEWIFE	NOT AVAILABLE	1175	M	SS	SS	NOT AVAILABLE	11	NO	NOT AVAILABLE	NO	NOT AVAILABLE	NO	NOT AVAILABLE	NO	NOT AVAILABLE	NOT AVAILABLE	1	2	3	0	3	1	0	3	0	3	0	1	2	0	3	3	3	0	0	0	0	2	3	2
175	MALE	Chinese	14	NOT AVAILABLE	NOT AVAILABLE	NOT AVAILABLE	NOT AVAILABLE	NOT AVAILABLE	9	M	DIP	SS	NOT AVAILABLE	999	NO	NOT AVAILABLE	NO	NOT AVAILABLE	NO	NOT AVAILABLE	YES	NOT AVAILABLE	NOT AVAILABLE	2	3	2	3	2	0	2	1	2	2	0	2	2	2	2	2	1	2	2	2	2	3	2	2
365	MALE	Malay	13	POLICEMAN	GOVERNMENT SERVANT	HOUSEWIFE	HOUSEWIFE	NOT AVAILABLE	3000	S	SS	SS	NOT AVAILABLE	999	NO	NOT AVAILABLE	NO	NOT AVAILABLE	NO	NOT AVAILABLE	NO	NOT AVAILABLE	NOT AVAILABLE	1	1	2	0	3	2	0	3	0	3	0	1	3	2	3	2	2	0	0	0	0	2	3	3
362	MALE	Chinese	14	COMPANY WORKER	PRIVATE STAFF	COMPANY WORKER	PRIVATE STAFF	NOT AVAILABLE	3500	S	SS	DIP	NOT AVAILABLE	999	NO	NOT AVAILABLE	YES	NOT AVAILABLE	YES	NOT AVAILABLE	NO	NOT AVAILABLE	NOT AVAILABLE	2	1	3	1	0	2	1	3	1	0	0	2	99	0	2	1	0	1	0	3	2	0	2	1
220	FEMALE	Malay	16	WELDER	PRIVATE STAFF	SURVEYOR	PRIVATE STAFF	NOT AVAILABLE	5000	M	DIP	DEG	NOT AVAILABLE	999	NO	NOT AVAILABLE	NO	NOT AVAILABLE	YES	FATHER	YES	BOTH PARENT	NOT AVAILABLE	2	3	3	0	3	3	0	3	3	3	0	0	0	1	3	3	3	0	0	0	0	3	3	3

## Sheet: CFA
ID	Gender	Random	Ethnic	Age	Occ_Father	Father_cat	Occ_Mother	Mother_cat	Occ_Guardian	Monthly_income	Parents_marital	Educ_Father	Educ_Mother	Educ_Guardian	No_siblings	FH_Mental	Fam_Mental	FH_Forensic	Fam_Forensic	FH_Jailed	Fam_jailed	FH_Chronic	Fam_illness	Fam_inV	Q1	Q2	Q3	Q4	Q5	Q6	Q7	Q8	Q9	Q10	Q11	Q12	Q13	Q14	Q15	Q16	Q17	Q18	Q19	Q20	Q21	Q22	Q23	Q24
21	MALE	0.6973347NOT AVAILABLE297657	Chinese	14	PENSIONER	PENSIONER	HOUSEWIFE	HOUSEWIFE	NOT AVAILABLE	9	M	SS	SS	NOT AVAILABLE	2	NO	NOT AVAILABLE	NO	NOT AVAILABLE	NO	NOT AVAILABLE	NO	NOT AVAILABLE	NOT AVAILABLE	2	2	2	2	1	1	2	1	2	2	1	2	2	1	2	1	1	2	1	1	2	1	2	1
48	MALE	0.694476	Chinese	14	FARMER	PRIVATE STAFF	NOT AVAILABLE	NOT AVAILABLE	NOT AVAILABLE	9	M	SS	SS	NOT AVAILABLE	3	NO	NOT AVAILABLE	NO	NOT AVAILABLE	NO	NOT AVAILABLE	NO	NOT AVAILABLE	NOT AVAILABLE	2	1	2	0	2	3	0	3	0	2	0	0	2	1	3	3	2	1	0	2	1	1	1	3
79	MALE	0.968655	Malay	15	PENSIONER	RETIREE	PENSIONER	RETIREE	NOT AVAILABLE	9	M	SS	SS	NOT AVAILABLE	3	NO	NOT AVAILABLE	NO	NOT AVAILABLE	NO	NOT AVAILABLE	NO	NOT AVAILABLE	NOT AVAILABLE	2	1	2	0	3	1	0	3	2	3	1	0	2	1	3	2	2	0	0	1	0	1	3	3
128	FEMALE	0.550361	Chinese	16	WORKER	PRIVATE STAFF	WORKER	GOVERNMENT SERVANT	NOT AVAILABLE	9	M	SS	DIP	NOT AVAILABLE	2	NO	NOT AVAILABLE	NO	NOT AVAILABLE	NO	NOT AVAILABLE	NO	NOT AVAILABLE	NOT AVAILABLE	1	0	1	0	2	2	0	1	1	1	0	0	2	1	2	2	2	0	0	0	0	2	2	1
159	FEMALE	0.784772	Chinese	14	BUSSINESSMAN	BUSINESSMAN	HOUSEWIFE	HOUSEWIFE	NOT AVAILABLE	9	M	SS	SS	NOT AVAILABLE	2	NO	NOT AVAILABLE	NO	NOT AVAILABLE	NO	NOT AVAILABLE	NO	NOT AVAILABLE	NOT AVAILABLE	3	1	3	0	3	2	1	2	0	0	3	0	3	1	3	3	3	0	2	1	3	1	3	2
168	FEMALE	0.523476	Chinese	13	NOT AVAILABLE	NOT AVAILABLE	NOT AVAILABLE	NOT AVAILABLE	NOT AVAILABLE	9	D	SS	SS	SS	3	NO	NOT AVAILABLE	NO	NOT AVAILABLE	NO	NOT AVAILABLE	YES	NOT AVAILABLE	DIABETES	1	0	1	2	1	0	1	1	2	1	2	1	1	1	1	2	0	3	0	1	0	1	2	1
169	FEMALE	0.492359	Chinese	13	SALESMAN	PRIVATE STAFF	SALESWOMAN	PRIVATE STAFF	NOT AVAILABLE	9	M	SS	SS	NOT AVAILABLE	2	NO	NOT AVAILABLE	NO	NOT AVAILABLE	NO	NOT AVAILABLE	NO	NOT AVAILABLE	NOT AVAILABLE	0	1	2	0	3	3	0	3	0	1	1	0	3	0	3	3	3	0	0	0	0	3	1	2
174	MALE	0.7225NOT AVAILABLE08NOT AVAILABLE69573	Chinese	14	UNEMPLOYED	UNEMPLOYED	BANKER	PRIVATE STAFF	NOT AVAILABLE	9	M	DEG	DEG	NOT AVAILABLE	3	NO	NOT AVAILABLE	NO	NOT AVAILABLE	NO	NOT AVAILABLE	YES	FATHER	NOT AVAILABLE	2	3	2	3	2	0	2	3	0	3	1	3	2	0	3	3	3	0	0	0	0	3	3	3
185	MALE	0.80349	Chinese	14	ENGINEER	PRIVATE STAFF	HOUSEWIFE	HOUSEWIFE	NOT AVAILABLE	9	M	SS	SS	NOT AVAILABLE	4	NO	NOT AVAILABLE	NO	NOT AVAILABLE	NO	NOT AVAILABLE	NO	NOT AVAILABLE	NOT AVAILABLE	1	0	1	1	2	1	0	1	0	1	0	1	0	0	1	1	3	1	0	1	0	0	1	0
243	MALE	0.NOT AVAILABLENOT AVAILABLE23683717794	Malay	13	BUSINESSMAN	BUSINESSMAN	POLICEMAN	GOVERNMENT SERVANT	NOT AVAILABLE	9	M	DIP	DIP	NOT AVAILABLE	3	NO	NOT AVAILABLE	NO	NOT AVAILABLE	NO	NOT AVAILABLE	NO	NOT AVAILABLE	NOT AVAILABLE	0	1	3	0	3	3	0	2	0	3	0	0	1	0	3	2	3	0	1	0	0	3	3	2
245	FEMALE	0.582533	Malay	13	POLICEMAN	GOVERNMENT SERVANT	GOVERNMENT SERVANT	GOVERNMENT SERVANT	NOT AVAILABLE	9	M	DIP	DIP	NOT AVAILABLE	3	YES	FATHER	NO	NOT AVAILABLE	YES	FATHER	YES	GRANDMOTHER	HYPERTENSION	2	1	1	0	3	2	0	3	0	2	0	0	3	2	3	3	3	0	1	0	0	3	3	3
276	MALE	0.758364	Malay	15	GENERAL WORKER	GOVERNMENT SERVANT	HOUSEWIFE	HOUSEWIFE	NOT AVAILABLE	9	M	DIP	DIP	NOT AVAILABLE	5	NOT AVAILABLE	NOT AVAILABLE	NOT AVAILABLE	NOT AVAILABLE	NOT AVAILABLE	NOT AVAILABLE	NOT AVAILABLE	NOT AVAILABLE	NOT AVAILABLE	1	2	2	0	1	2	0	2	2	3	1	0	1	1	2	2	1	0	1	0	0	3	2	1
285	MALE	0.971481	Malay	15	POLICEMAN	GOVERNMENT SERVANT	CLERK	GOVERNMENT SERVANT	NOT AVAILABLE	9	M	SS	SS	NOT AVAILABLE	5	NO	NOT AVAILABLE	NO	NOT AVAILABLE	NO	NOT AVAILABLE	NO	NOT AVAILABLE	NOT AVAILABLE	1	1	2	0	3	2	0	3	0	2	0	0	1	1	3	3	3	0	2	0	0	2	2	3
288	MALE	0.752732	Malay	15	SELF-EMPLOYED	SELF-EMPLOYED	SCIENCE OFFICER	GOVERNMENT SERVANT	NOT AVAILABLE	9	M	SS	DEG	NOT AVAILABLE	3	NO	NOT AVAILABLE	NO	NOT AVAILABLE	NO	NOT AVAILABLE	NO	NOT AVAILABLE	NOT AVAILABLE	2	1	2	0	2	1	0	3	0	1	3	0	1	1	3	1	3	0	0	1	0	3	3	3
374	MALE	0.629229	Chinese	14	RETIREE	RETIREE	TEACHER	GOVERNMENT SERVANT	NOT AVAILABLE	9	M	DEG	DEG	NOT AVAILABLE	1	NO	NOT AVAILABLE	NO	NOT AVAILABLE	NO	NOT AVAILABLE	NOT AVAILABLE	NOT AVAILABLE	NOT AVAILABLE	1	1	1	0	2	2	0	2	1	2	3	0	2	0	3	1	1	0	1	0	0	1	3	3
232	FEMALE	0.755333	Malay	13	LABORER	PRIVATE STAFF	HOUSEWIFE	HOUSEWIFE	NOT AVAILABLE	500	M	SS	SS	NOT AVAILABLE	5	NO	NOT AVAILABLE	NO	NOT AVAILABLE	NO	NOT AVAILABLE	NO	NOT AVAILABLE	NOT AVAILABLE	1	0	3	0	1	1	0	3	1	3	3	0	1	3	3	3	3	0	0	0	0	1	3	3
258	FEMALE	0.640086	Malay	14	LABORER	PRIVATE STAFF	HOUSEWIFE	HOUSEWIFE	NOT AVAILABLE	500	M	DEG	DEG	NOT AVAILABLE	6	NO	NOT AVAILABLE	NO	NOT AVAILABLE	NO	NOT AVAILABLE	NO	NOT AVAILABLE	NOT AVAILABLE	0	1	3	0	3	3	0	0	0	0	1	0	1	3	3	3	3	0	0	0	0	0	3	3
353	MALE	0.62078NOT AVAILABLE48692563	Chinese	13	NOT AVAILABLE	NOT AVAILABLE	HAIRDRESSER	PRIVATE STAFF	NOT AVAILABLE	500	D	NOT AVAILABLE	PS	NOT AVAILABLE	2	NO	NOT AVAILABLE	NO	NOT AVAILABLE	NO	NOT AVAILABLE	NO	NOT AVAILABLE	NOT AVAILABLE	0	1	2	0	3	1	2	3	0	2	1	0	0	0	0	0	0	0	0	0	0	0	0	0
354	FEMALE	0.501842	Indian	13	GARDENER	PRIVATE STAFF	HOUSEWIFE	HOUSEWIFE	NOT AVAILABLE	900	M	SS	SS	NOT AVAILABLE	1	NO	NOT AVAILABLE	NO	NOT AVAILABLE	NO	NOT AVAILABLE	NO	NOT AVAILABLE	NOT AVAILABLE	2	2	1	0	0	0	99	0	0	0	0	0	0	0	1	0	0	0	0	0	1	2	1	0
93	FEMALE	0.730494	Indian	15	NOT AVAILABLE	NOT AVAILABLE	TEACHER	GOVERNMENT SERVANT	NOT AVAILABLE	1000	M	NOT AVAILABLE	SS	NOT AVAILABLE	4	NO	NOT AVAILABLE	NO	NOT AVAILABLE	NO	NOT AVAILABLE	NO	NOT AVAILABLE	NOT AVAILABLE	2	3	2	0	2	1	0	3	2	2	0	1	0	2	3	3	3	1	2	2	2	1	2	3
113	FEMALE	0.49784	Malay	15	LABORER	PRIVATE STAFF	HOUSEWIFE	HOUSEWIFE	NOT AVAILABLE	1000	M	SS	SS	NOT AVAILABLE	7	NO	NOT AVAILABLE	NO	NOT AVAILABLE	NO	NOT AVAILABLE	NO	NOT AVAILABLE	NOT AVAILABLE	1	1	2	0	2	1	0	2	0	1	0	0	1	0	3	3	1	0	0	0	0	1	2	3
165	FEMALE	0.877633	Chinese	13	BUSSINESSMAN	BUSINESSMAN	NOT AVAILABLE	NOT AVAILABLE	NOT AVAILABLE	1000	S	PS	PS	NOT AVAILABLE	3	NO	NOT AVAILABLE	NO	NOT AVAILABLE	NO	NOT AVAILABLE	YES	FATHER	HYPERTENSION	2	1	2	0	3	2	1	2	0	2	0	0	1	1	3	3	1	0	1	2	0	2	1	3
188	MALE	0.529388	Indian	13	NOT AVAILABLE	NOT AVAILABLE	CLINIC ASSISTANT	PRIVATE STAFF	NOT AVAILABLE	1000	D	NOT AVAILABLE	SS	NOT AVAILABLE	1	NO	NOT AVAILABLE	NO	NOT AVAILABLE	NO	NOT AVAILABLE	NO	NOT AVAILABLE	NOT AVAILABLE	1	2	3	0	3	3	0	2	0	2	0	1	3	1	3	3	2	0	1	1	1	3	3	3
280	MALE	0.463687	Malay	14	UNEMPLOYED	UNEMPLOYED	TEACHER	GOVERNMENT SERVANT	NOT AVAILABLE	1000	M	DEG	DEG	NOT AVAILABLE	3	NO	NOT AVAILABLE	NO	NOT AVAILABLE	NO	NOT AVAILABLE	NO	NOT AVAILABLE	NOT AVAILABLE	0	1	2	0	0	0	0	3	0	0	0	0	1	0	3	2	2	0	0	0	0	1	3	3
399	MALE	0.595412	Iban	14	RUBBISH COLLECTOR	PRIVATE STAFF	HOUSEWIFE	HOUSEWIFE	NOT AVAILABLE	1000	M	DIP	DIP	NOT AVAILABLE	6	NO	NOT AVAILABLE	NO	NOT AVAILABLE	NO	NOT AVAILABLE	NO	NOT AVAILABLE	NOT AVAILABLE	0	1	3	0	3	3	0	2	0	3	3	0	2	0	3	2	3	0	0	0	0	0	3	3
193	FEMALE	0.52963	Malay	16	SELF-EMPLOYED	SELF-EMPLOYED	HOUSEWIFE	HOUSEWIFE	NOT AVAILABLE	1200	M	DIP	SS	NOT AVAILABLE	6	NO	NOT AVAILABLE	NO	NOT AVAILABLE	NO	NOT AVAILABLE	YES	FATHER	HYPERTENSION	0	1	3	0	3	3	0	3	3	2	2	1	2	0	2	3	3	0	0	1	0	3	3	3
274	MALE	0.549736	Malay	15	SELF-EMPLOYED	SELF-EMPLOYED	HOUSEWIFE	HOUSEWIFE	NOT AVAILABLE	1200	M	PG	SS	NOT AVAILABLE	5	NO	NOT AVAILABLE	NO	NOT AVAILABLE	NO	NOT AVAILABLE	NO	NOT AVAILABLE	NOT AVAILABLE	2	0	2	0	3	3	0	3	0	0	2	0	3	0	3	3	1	0	0	0	0	3	3	2
61	FEMALE	0.597315772303NOT AVAILABLE1	Malay	14	NOT AVAILABLE	NOT AVAILABLE	SELF-EMPLOYED	SELF-EMPLOYED	NOT AVAILABLE	1300	D	NOT AVAILABLE	SS	NOT AVAILABLE	3	NO	NOT AVAILABLE	NO	NOT AVAILABLE	NO	NOT AVAILABLE	YES	MOTHER	ASTHMA	1	3	3	0	3	2	0	3	0	3	0	0	2	0	3	3	3	0	0	1	2	3	2	3
83	FEMALE	0.493973	Malay	16	PASSED AWAY	PASSED AWAY	PENSIONER	RETIREE	NOT AVAILABLE	1500	M	SS	SS	NOT AVAILABLE	5	NO	NOT AVAILABLE	NO	NOT AVAILABLE	NO	NOT AVAILABLE	NO	NOT AVAILABLE	NOT AVAILABLE	1	1	2	1	2	3	0	2	0	3	0	1	1	0	1	1	2	0	0	0	0	3	1	1
112	FEMALE	0.9691562161NOT AVAILABLE835	Malay	15	PENSIONER	PENSIONER	HOUSEWIFE	HOUSEWIFE	NOT AVAILABLE	1500	M	SS	SS	NOT AVAILABLE	6	NO	NOT AVAILABLE	NO	NOT AVAILABLE	NO	NOT AVAILABLE	YES	FATHER	HYPERTENSION	1	1	2	0	2	2	0	1	0	1	0	0	0	1	2	3	1	0	0	0	0	1	2	3
170	FEMALE	0.59186	Malay	13	NOT AVAILABLE	NOT AVAILABLE	RESTAURANT WORKER	PRIVATE STAFF	NOT AVAILABLE	1500	D	NOT AVAILABLE	SS	NOT AVAILABLE	1	NO	NOT AVAILABLE	NO	NOT AVAILABLE	NO	NOT AVAILABLE	NO	NOT AVAILABLE	NOT AVAILABLE	3	1	3	2	2	1	0	3	0	1	0	0	2	1	3	2	2	0	1	0	0	2	3	2
171	FEMALE	0.648523	IBAN	13	SECURITY GUARD	PRIVATE STAFF	HOUSEWIFE	HOUSEWIFE	NOT AVAILABLE	1500	M	PS	SS	NOT AVAILABLE	3	NO	NOT AVAILABLE	NO	NOT AVAILABLE	NO	NOT AVAILABLE	NO	NOT AVAILABLE	NOT AVAILABLE	3	1	3	0	3	1	0	3	2	3	0	0	2	1	3	3	3	0	3	3	2	3	1	3
216	FEMALE	0.875244	Malay	16	NOT AVAILABLE	NOT AVAILABLE	NOT AVAILABLE	NOT AVAILABLE	NOT AVAILABLE	1500	M	DEG	DEG	NOT AVAILABLE	4	NO	NOT AVAILABLE	NO	NOT AVAILABLE	YES	UNCLE	YES	NOT AVAILABLE	HYPERTENSION, DIABETES	0	1	3	0	2	1	0	1	0	2	0	1	0	2	3	1	2	0	0	0	0	2	3	2
335	FEMALE	0.560561	Malay	15	NOT AVAILABLE	NOT AVAILABLE	NURSE	GOVERNMENT SERVANT	NOT AVAILABLE	1500	P	NOT AVAILABLE	DEG	NOT AVAILABLE	1	NO	NOT AVAILABLE	NO	NOT AVAILABLE	NO	NOT AVAILABLE	YES	FATHER	DIABETES	1	0	3	0	3	1	0	2	0	1	0	1	2	1	2	2	2	0	1	0	0	1	2	2
368	MALE	0.823969	Indian	13	WIREMAN	PRIVATE STAFF	FACTORY WORKER	PRIVATE STAFF	NOT AVAILABLE	1500	M	SS	NOT AVAILABLE	NOT AVAILABLE	4	NO	NOT AVAILABLE	NO	NOT AVAILABLE	NOT AVAILABLE	NOT AVAILABLE	NO	NOT AVAILABLE	NOT AVAILABLE	3	3	0	3	0	2	3	2	1	1	0	3	2	2	3	2	0	1	2	1	3	3	3	3
76	FEMALE	0.907294	Malay	16	COACH	PRIVATE STAFF	HOUSEWIFE	HOUSEWIFE	NOT AVAILABLE	1600	M	DIP	SS	NOT AVAILABLE	4	NO	NOT AVAILABLE	NO	NOT AVAILABLE	NO	NOT AVAILABLE	NO	NOT AVAILABLE	NOT AVAILABLE	3	1	3	0	3	3	0	3	1	3	0	0	0	1	3	3	3	0	0	0	0	3	3	3
293	MALE	0.593827	Malay	15	BANKER	PRIVATE STAFF	HOUSEWIFE	HOUSEWIFE	NOT AVAILABLE	1600	M	PG	DEG	NOT AVAILABLE	2	NO	NOT AVAILABLE	NO	NOT AVAILABLE	NO	NOT AVAILABLE	NO	NOT AVAILABLE	NOT AVAILABLE	0	0	2	0	3	3	0	2	0	2	0	0	1	0	3	3	2	0	0	0	0	1	2	3
111	MALE	0.716126	Chinese	16	CONTRACTOR	SELF-EMPLOYED	NOT AVAILABLE	NOT AVAILABLE	NOT AVAILABLE	1700	M	SS	SS	NOT AVAILABLE	999	NO	NOT AVAILABLE	NO	NOT AVAILABLE	NO	NOT AVAILABLE	NO	NOT AVAILABLE	NOT AVAILABLE	2	0	1	0	1	1	0	3	1	3	1	0	3	3	3	3	2	0	3	2	0	1	2	2
95	FEMALE	0.943126	Malay	15	NOT AVAILABLE	NOT AVAILABLE	MANAGER	PRIVATE STAFF	PENSION	1800	M	NOT AVAILABLE	DEG	DIP	2	NO	NOT AVAILABLE	YES	MOTHER	NO	NOT AVAILABLE	YES	GRANDMOTHER	HYPERTENSION	1	1	2	0	2	1	0	2	0	1	99	0	1	1	2	3	2	0	1	0	0	1	2	3
98	FEMALE	0.871275	Malay	15	SUPERVISOR	PRIVATE STAFF	HOUSEWIFE	HOUSEWIFE	NOT AVAILABLE	1900	M	PS	SS	NOT AVAILABLE	2	NO	NOT AVAILABLE	NO	NOT AVAILABLE	NO	NOT AVAILABLE	NO	NOT AVAILABLE	NOT AVAILABLE	0	1	2	0	2	1	0	1	0	2	0	1	1	1	2	2	2	0	0	0	0	1	1	1
6	FEMALE	0.4901422868188NOT AVAILABLE	Chinese	13	NOT AVAILABLE	NOT AVAILABLE	SELF-EMPLOYED	SELF-EMPLOYED	NOT AVAILABLE	2000	D	SS	SS	NOT AVAILABLE	2	NO	NOT AVAILABLE	NO	NOT AVAILABLE	NO	NOT AVAILABLE	NO	NOT AVAILABLE	NOT AVAILABLE	0	3	2	1	1	3	1	2	1	2	0	2	1	0	2	1	2	1	0	1	0	3	1	3
80	MALE	0.636979	Malay	15	PENSIONER	PENSIONER	HOUSEWIFE	HOUSEWIFE	NOT AVAILABLE	2000	S	SS	SS	NOT AVAILABLE	2	NO	NOT AVAILABLE	NO	NOT AVAILABLE	NO	NOT AVAILABLE	YES	BOTH PARENT	NOT AVAILABLE	0	2	2	0	2	1	1	3	0	1	0	1	2	1	2	1	3	0	0	1	0	1	3	3
105	MALE	0.510393	Chinese	15	LORRY DRIVER	PRIVATE STAFF	HOUSEWIFE	HOUSEWIFE	NOT AVAILABLE	2000	M	SS	SS	NOT AVAILABLE	4	NO	NOT AVAILABLE	NO	NOT AVAILABLE	NO	NOT AVAILABLE	YES	GRANDFATHER	NOT AVAILABLE	1	1	1	0	2	1	1	2	0	1	2	2	1	1	1	2	1	0	0	1	1	1	1	0
212	MALE	0.580016	Malay	16	PENSIONER	PENSIONER	HOUSEWIFE	HOUSEWIFE	NOT AVAILABLE	2000	P	PG	SS	PS	6	NO	NOT AVAILABLE	NO	NOT AVAILABLE	NO	NOT AVAILABLE	YES	BOTH PARENT	HYPERTENSION	0	1	2	1	2	3	0	2	2	3	0	0	2	0	3	2	2	1	0	2	1	3	3	2
241	MALE	0.600122	Malay	13	NOT AVAILABLE	NOT AVAILABLE	TEACHER	GOVERNMENT SERVANT	NOT AVAILABLE	2000	D	NOT AVAILABLE	SS	NOT AVAILABLE	1	NO	NOT AVAILABLE	NO	NOT AVAILABLE	NO	NOT AVAILABLE	NO	NOT AVAILABLE	NOT AVAILABLE	3	2	3	0	0	2	0	3	0	2	0	0	2	2	2	3	2	0	3	0	99	2	0	2
388	MALE	0.862147	Malay	14	GROCERER	PRIVATE STAFF	HOUSEWIFE	HOUSEWIFE	NOT AVAILABLE	2000	M	SS	SS	NOT AVAILABLE	2	NO	NOT AVAILABLE	NO	NOT AVAILABLE	NO	NOT AVAILABLE	NO	NOT AVAILABLE	NOT AVAILABLE	1	1	1	0	2	1	0	1	0	0	0	0	2	1	2	2	0	1	1	1	0	3	1	1
393	MALE	0.849347	Malay	14	PAINTER	PRIVATE STAFF	CLEANER	PRIVATE STAFF	NOT AVAILABLE	2000	M	SS	SS	NOT AVAILABLE	4	NO	NOT AVAILABLE	NO	NOT AVAILABLE	NO	NOT AVAILABLE	NO	NOT AVAILABLE	NOT AVAILABLE	1	1	2	0	3	2	0	2	1	1	1	1	2	1	3	3	2	2	1	2	0	3	2	2
41	MALE	0.579827	Chinese	14	MECHANIC	PRIVATE STAFF	HOUSEWIFE	HOUSEWIFE	NOT AVAILABLE	2200	M	SS	SS	NOT AVAILABLE	2	NO	NOT AVAILABLE	NO	NOT AVAILABLE	NO	NOT AVAILABLE	NO	NOT AVAILABLE	NOT AVAILABLE	2	0	2	0	2	2	0	2	0	2	0	0	2	1	3	2	3	0	1	0	1	2	3	3
403	MALE	0.931424	Malay	17	NOT AVAILABLE	NOT AVAILABLE	ASSISTANT NURSE	GOVERNMENT SERVANT	NOT AVAILABLE	2200	M	SS	DIP	NOT AVAILABLE	6	NO	NOT AVAILABLE	NO	NOT AVAILABLE	NO	NOT AVAILABLE	NO	NOT AVAILABLE	NOT AVAILABLE	1	2	1	0	1	2	1	2	2	2	2	1	1	1	2	2	2	1	1	0	0	1	2	2
4	MALE	0.852417	Chinese	13	SELF-EMPLOYED	SELF-EMPLOYED	HOUSEWIFE	HOUSEWIFE	NOT AVAILABLE	2500	M	SS	SS	NOT AVAILABLE	3	NO	NOT AVAILABLE	NO	NOT AVAILABLE	NO	NOT AVAILABLE	NO	NOT AVAILABLE	NOT AVAILABLE	0	0	1	0	3	0	0	2	0	0	0	1	2	0	2	3	0	0	0	1	0	3	1	3
52	MALE	0.788295	Malay	14	LORRY DRIVER	PRIVATE STAFF	HOUSEWIFE	HOUSEWIFE	NOT AVAILABLE	2500	M	SS	SS	NOT AVAILABLE	4	NO	NOT AVAILABLE	NO	NOT AVAILABLE	NO	NOT AVAILABLE	NO	NOT AVAILABLE	NOT AVAILABLE	3	3	2	0	3	1	0	1	0	2	1	1	0	0	1	1	2	0	0	0	0	0	1	1
55	MALE	0.752829	Malay	14	LABORER	PRIVATE STAFF	HAWKER	PRIVATE STAFF	NOT AVAILABLE	2500	M	SS	SS	NOT AVAILABLE	6	NO	NOT AVAILABLE	NO	NOT AVAILABLE	NO	NOT AVAILABLE	NO	NOT AVAILABLE	NOT AVAILABLE	0	0	1	0	2	3	0	2	0	1	1	0	1	1	2	1	1	0	0	0	0	1	2	2
64	FEMALE	0.921142	Malay	14	SELF-EMPLOYED	SELF-EMPLOYED	ASSISTANT	PRIVATE STAFF	NOT AVAILABLE	2500	M	SS	DIP	NOT AVAILABLE	3	NO	NOT AVAILABLE	NO	NOT AVAILABLE	NO	NOT AVAILABLE	NO	NOT AVAILABLE	NOT AVAILABLE	0	2	3	0	3	3	0	3	1	2	0	0	2	0	2	3	2	0	0	0	0	3	1	3
123	MALE	0.69485	Malay	16	ARTIST	PRIVATE STAFF	HOUSEWIFE	HOUSEWIFE	NOT AVAILABLE	2500	M	SS	SS	NOT AVAILABLE	5	NO	NOT AVAILABLE	NO	NOT AVAILABLE	NO	NOT AVAILABLE	YES	RESPONDEN	NOT AVAILABLE	2	1	1	0	2	1	0	2	0	1	0	0	2	1	3	3	2	0	0	0	1	1	3	2
133	FEMALE	0.670369	Chinese	16	LABORER	PRIVATE STAFF	HOUSEWIFE	HOUSEWIFE	NOT AVAILABLE	2500	M	SS	SS	NOT AVAILABLE	5	NO	NOT AVAILABLE	NO	NOT AVAILABLE	NO	NOT AVAILABLE	NO	NOT AVAILABLE	NOT AVAILABLE	1	1	2	0	3	2	1	2	1	1	1	1	2	0	1	2	2	0	1	1	0	1	1	2
244	MALE	0.900406	Malay	13	ENGINEER	PRIVATE STAFF	NOT AVAILABLE	NOT AVAILABLE	NOT AVAILABLE	2500	S	PG	SS	NOT AVAILABLE	5	NO	NOT AVAILABLE	NO	NOT AVAILABLE	NO	NOT AVAILABLE	NO	NOT AVAILABLE	NOT AVAILABLE	0	0	3	1	3	2	0	3	3	2	0	1	3	3	3	3	2	0	0	0	0	3	3	3
327	FEMALE	0.4648308821911NOT AVAILABLE	Malay	15	SALESMAN	PRIVATE STAFF	HOUSEWIFE	HOUSEWIFE	NOT AVAILABLE	2500	M	SS	SS	NOT AVAILABLE	6	NO	NOT AVAILABLE	NO	NOT AVAILABLE	NO	NOT AVAILABLE	NO	NOT AVAILABLE	NOT AVAILABLE	0	1	3	0	3	1	0	2	0	2	0	0	1	1	3	3	3	0	0	0	0	1	3	2
383	FEMALE	0.494415	Malay	15	RETIREE	RETIREE	HOUSEWIFE	HOUSEWIFE	NOT AVAILABLE	2500	M	DIP	SS	NOT AVAILABLE	5	NO	NOT AVAILABLE	NO	NOT AVAILABLE	NO	NOT AVAILABLE	NO	NOT AVAILABLE	NOT AVAILABLE	1	1	3	1	3	2	0	3	1	1	0	2	3	0	3	3	3	0	1	0	0	3	3	3
391	MALE	0.763744	Malay	14	WIREMAN	PRIVATE STAFF	CLERK	GOVERNMENT SERVANT	NOT AVAILABLE	2500	M	SS	SS	NOT AVAILABLE	6	NO	NOT AVAILABLE	NO	NOT AVAILABLE	NO	NOT AVAILABLE	NO	NOT AVAILABLE	NOT AVAILABLE	0	1	2	0	1	2	0	1	0	1	0	1	1	0	2	2	2	0	0	0	0	3	3	1
392	MALE	0.598575	Malay	14	FORESTRY WORKER	GOVERNMENT SERVANT	RESTAURANT WORKER	PRIVATE STAFF	NOT AVAILABLE	2500	M	SS	SS	NOT AVAILABLE	4	NO	NOT AVAILABLE	NO	NOT AVAILABLE	NO	NOT AVAILABLE	NO	NOT AVAILABLE	NOT AVAILABLE	1	1	2	0	0	1	0	1	0	1	0	0	0	0	2	2	2	0	0	0	0	2	1	2
397	MALE	0.62198825NOT AVAILABLE82135	Malay	14	LABORER	PRIVATE STAFF	TEACHER	GOVERNMENT SERVANT	UNEMPLOYED	2500	M	SS	DIP	SS	4	NO	NOT AVAILABLE	NO	NOT AVAILABLE	NO	NOT AVAILABLE	NO	NOT AVAILABLE	NOT AVAILABLE	2	1	2	0	2	3	0	2	1	3	0	1	2	0	3	2	2	0	0	2	0	2	3	3
404	MALE	0.816904	Malay	17	NOT AVAILABLE	NOT AVAILABLE	ASSISTANT NURSE	GOVERNMENT SERVANT	NOT AVAILABLE	2500	M	SS	DIP	NOT AVAILABLE	6	NO	NOT AVAILABLE	NO	NOT AVAILABLE	NO	NOT AVAILABLE	NO	NOT AVAILABLE	NOT AVAILABLE	1	2	1	0	1	2	1	2	2	2	2	1	1	1	2	2	2	1	1	0	0	1	2	2
129	FEMALE	0.98509	Chinese	16	PROMOTER	PRIVATE STAFF	PROMOTER	PRIVATE STAFF	NOT AVAILABLE	2600	S	SS	SS	NOT AVAILABLE	2	NO	NOT AVAILABLE	NO	NOT AVAILABLE	NO	NOT AVAILABLE	NO	NOT AVAILABLE	NOT AVAILABLE	2	1	2	0	3	2	0	2	0	1	1	1	2	1	2	2	2	1	1	1	1	2	2	1
268	FEMALE	0.93100706NOT AVAILABLE73685	Malay	14	SELF-EMPLOYED	SELF-EMPLOYED	COURT WORKER	GOVERNMENT SERVANT	NOT AVAILABLE	2700	M	DIP	DIP	NOT AVAILABLE	2	NO	NOT AVAILABLE	NO	NOT AVAILABLE	NO	NOT AVAILABLE	NO	NOT AVAILABLE	NOT AVAILABLE	1	2	2	0	1	1	0	2	2	0	0	0	2	1	2	2	2	0	1	0	0	2	2	2
94	FEMALE	0.813719	Malay	15	PENSIONER	PENSIONER	CLERK	GOVERNMENT SERVANT	NOT AVAILABLE	2778	M	DIP	SS	NOT AVAILABLE	999	NO	NOT AVAILABLE	NO	NOT AVAILABLE	NO	NOT AVAILABLE	YES	FATHER	NOT AVAILABLE	0	3	2	0	3	3	0	3	3	3	0	0	0	0	2	2	3	0	0	0	0	3	2	3
91	FEMALE	0.512513	Chinese	15	DRIVER	PRIVATE STAFF	BARBER	PRIVATE STAFF	NOT AVAILABLE	2800	D	SS	PS	NOT AVAILABLE	1	NO	NOT AVAILABLE	NO	NOT AVAILABLE	NO	NOT AVAILABLE	NO	NOT AVAILABLE	NOT AVAILABLE	0	1	2	0	3	1	1	2	1	1	0	1	1	1	2	2	2	1	0	1	1	3	2	2
131	FEMALE	0.913274	Chinese	16	FISHERMAN	PRIVATE STAFF	ARCHITECT	PRIVATE STAFF	NOT AVAILABLE	2800	D	SS	DIP	NOT AVAILABLE	2	NOT AVAILABLE	NOT AVAILABLE	NOT AVAILABLE	NOT AVAILABLE	NOT AVAILABLE	NOT AVAILABLE	YES	FATHER	NOT AVAILABLE	2	1	2	0	2	1	0	2	0	1	0	0	3	2	2	2	2	0	1	0	0	2	1	2
151	MALE	0.7419652842852NOT AVAILABLE	Chinese	16	BUSSINESSMAN	BUSINESSMAN	GOVERNMENT SERVANT	GOVERNMENT SERVANT	NOT AVAILABLE	2800	D	SS	SS	NOT AVAILABLE	3	NO	NOT AVAILABLE	YES	BOTH PARENTS	NO	NOT AVAILABLE	YES	NOT AVAILABLE	HEART PROBLEM	1	1	2	0	2	0	0	2	0	99	1	1	1	0	2	2	1	0	1	0	0	1	2	3
13	MALE	0.892493	Malay	16	PUBLIC SERVANT	GOVERNMENT SERVANT	HOUSEWIFE	HOUSEWIFE	NOT AVAILABLE	3000	M	SS	SS	NOT AVAILABLE	2	NO	NOT AVAILABLE	NO	NOT AVAILABLE	NO	NOT AVAILABLE	NO	NOT AVAILABLE	NOT AVAILABLE	1	1	3	1	2	1	0	2	0	1	0	1	1	2	2	2	2	0	1	0	0	1	2	1
20	MALE	0.509025	Chinese	16	FISHMONGER	PRIVATE STAFF	FISHMONGER	PRIVATE STAFF	NOT AVAILABLE	3000	M	PS	SS	NOT AVAILABLE	6	NO	NOT AVAILABLE	NO	NOT AVAILABLE	NO	NOT AVAILABLE	YES	MOTHER	NOT AVAILABLE	2	3	2	1	3	2	1	3	0	1	1	1	2	0	2	3	3	2	2	1	1	1	2	3
24	FEMALE	0.561234	Chinese	14	WIREMAN	PRIVATE STAFF	HOUSEWIFE	HOUSEWIFE	NOT AVAILABLE	3000	M	SS	DIP	NOT AVAILABLE	2	NO	NOT AVAILABLE	NO	NOT AVAILABLE	NO	NOT AVAILABLE	NO	NOT AVAILABLE	NOT AVAILABLE	1	1	3	1	2	2	2	3	2	1	1	2	1	1	2	0	3	1	2	2	1	3	2	2
26	FEMALE	0.670417	Chinese	14	MECHANIC	PRIVATE STAFF	HOUSEWIFE	HOUSEWIFE	NOT AVAILABLE	3000	M	SS	SS	NOT AVAILABLE	4	NO	NOT AVAILABLE	NO	NOT AVAILABLE	NO	NOT AVAILABLE	NO	NOT AVAILABLE	NOT AVAILABLE	2	2	3	1	3	0	2	2	0	3	1	2	3	1	3	1	2	0	1	0	0	2	3	1
28	FEMALE	0.491527	Chinese	14	BUTCHER	PRIVATE STAFF	HOUSEWIFE	HOUSEWIFE	NOT AVAILABLE	3000	M	DIP	SS	NOT AVAILABLE	3	NO	NOT AVAILABLE	NO	NOT AVAILABLE	NO	NOT AVAILABLE	YES	FATHER	NOT AVAILABLE	1	1	2	0	3	2	2	3	1	1	1	0	1	1	2	3	2	3	1	0	2	3	2	2
30	FEMALE	0.516291	Chinese	14	CARPENTER	PRIVATE STAFF	HOUSEWIFE	HOUSEWIFE	NOT AVAILABLE	3000	M	SS	SS	NOT AVAILABLE	3	NO	NOT AVAILABLE	NO	NOT AVAILABLE	NO	NOT AVAILABLE	NO	NOT AVAILABLE	NOT AVAILABLE	1	3	1	0	3	1	0	0	0	0	0	1	3	0	1	0	3	0	0	0	0	1	0	3
31	FEMALE	0.861327	Chinese	14	HAWKER	SELF-EMPLOYED	HOUSEWIFE	HOUSEWIFE	NOT AVAILABLE	3000	M	DEG	DIP	NOT AVAILABLE	3	NO	NOT AVAILABLE	NO	NOT AVAILABLE	NO	NOT AVAILABLE	YES	GRANDFATHER	HEART PROBLEM	1	1	3	0	2	0	0	2	0	1	0	0	2	2	3	2	3	0	1	0	0	1	2	2
53	MALE	0.891037	Malay	14	OFFICER	GOVERNMENT SERVANT	OFFICER	GOVERNMENT SERVANT	NOT AVAILABLE	3000	M	DIP	DIP	NOT AVAILABLE	3	NO	NOT AVAILABLE	NO	NOT AVAILABLE	NO	NOT AVAILABLE	NO	NOT AVAILABLE	NOT AVAILABLE	0	1	3	0	2	2	0	1	0	3	0	0	1	0	1	1	2	1	0	0	0	1	2	3
70	FEMALE	0.654423	Malay	16	BUSSINESSMAN	BUSINESSMAN	HOUSEWIFE	HOUSEWIFE	NOT AVAILABLE	3000	M	SS	SS	NOT AVAILABLE	4	NO	NOT AVAILABLE	NO	NOT AVAILABLE	NO	NOT AVAILABLE	NO	NOT AVAILABLE	NOT AVAILABLE	1	1	2	0	3	3	0	3	0	1	0	0	3	0	3	3	3	0	0	0	0	3	3	3
72	FEMALE	0.539712	Indian	16	NOT AVAILABLE	NOT AVAILABLE	MANAGER	PRIVATE STAFF	NOT AVAILABLE	3000	M	SS	SS	NOT AVAILABLE	2	NO	NOT AVAILABLE	NO	NOT AVAILABLE	NO	NOT AVAILABLE	NO	NOT AVAILABLE	NOT AVAILABLE	1	1	2	0	1	1	0	2	0	3	1	1	2	1	1	3	2	0	1	1	0	3	1	2
89	FEMALE	0.488296	Chinese	16	WELDER	PRIVATE STAFF	ACCOUNTANT	PRIVATE STAFF	NOT AVAILABLE	3000	M	SS	SS	NOT AVAILABLE	1	NO	NOT AVAILABLE	NO	NOT AVAILABLE	NO	NOT AVAILABLE	NO	NOT AVAILABLE	NOT AVAILABLE	1	1	2	1	3	2	0	2	0	1	0	1	2	0	1	1	1	0	1	1	1	1	1	1
92	FEMALE	0.675437	Chinese	15	NOT AVAILABLE	NOT AVAILABLE	PROMOTER	PRIVATE STAFF	NOT AVAILABLE	3000	D	SS	SS	NOT AVAILABLE	2	NO	NOT AVAILABLE	NO	NOT AVAILABLE	NO	NOT AVAILABLE	YES	RESPONDEN	NOT AVAILABLE	0	2	2	0	3	1	1	2	1	1	1	1	1	1	2	2	1	1	0	1	2	3	1	2
97	FEMALE	0.659007	Malay	15	SUPERVISOR	PRIVATE STAFF	CLERK	GOVERNMENT SERVANT	NOT AVAILABLE	3000	M	DIP	DIP	NOT AVAILABLE	3	NO	NOT AVAILABLE	NO	NOT AVAILABLE	NO	NOT AVAILABLE	NO	NOT AVAILABLE	NOT AVAILABLE	2	1	3	0	3	1	1	2	1	1	99	2	3	2	2	2	2	0	1	0	0	1	2	3
115	FEMALE	0.733049	Chinese	15	BUSSINESSMAN	BUSINESSMAN	NOT AVAILABLE	NOT AVAILABLE	NOT AVAILABLE	3000	M	PS	SS	NOT AVAILABLE	2	NO	NOT AVAILABLE	NO	NOT AVAILABLE	NO	NOT AVAILABLE	NO	NOT AVAILABLE	NOT AVAILABLE	2	1	1	1	1	2	1	2	1	2	0	1	2	2	2	3	3	1	2	1	1	1	2	2
134	FEMALE	0.647223	Chinese	16	BUSSINESSMAN	BUSINESSMAN	HOUSEWIFE	HOUSEWIFE	NOT AVAILABLE	3000	M	SS	DIP	NOT AVAILABLE	4	NO	NOT AVAILABLE	NO	NOT AVAILABLE	NO	NOT AVAILABLE	NO	NOT AVAILABLE	NOT AVAILABLE	2	1	2	1	2	2	0	2	2	1	2	1	1	1	1	2	1	1	0	1	1	0	1	2
138	MALE	0.503693	Chinese	16	BUSSINESSMAN	BUSINESSMAN	NOT AVAILABLE	NOT AVAILABLE	NOT AVAILABLE	3000	M	SS	SS	NOT AVAILABLE	2	NO	NOT AVAILABLE	NO	NOT AVAILABLE	NO	NOT AVAILABLE	YES	FATHER	NOT AVAILABLE	3	2	2	1	2	2	2	1	2	2	2	2	1	1	2	2	2	0	1	1	1	0	1	1
140	FEMALE	0.769073	Chinese	16	WELDER	PRIVATE STAFF	CLERK	GOVERNMENT SERVANT	NOT AVAILABLE	3000	M	SS	SS	NOT AVAILABLE	3	NO	NOT AVAILABLE	NO	NOT AVAILABLE	NO	NOT AVAILABLE	NO	NOT AVAILABLE	NOT AVAILABLE	1	1	2	0	3	1	0	2	0	1	0	0	2	1	2	2	3	0	1	0	0	2	2	2
141	FEMALE	0.850274	Chinese	16	BUSSINESSMAN	BUSINESSMAN	HOUSEWIFE	HOUSEWIFE	NOT AVAILABLE	3000	M	SS	SS	NOT AVAILABLE	4	NO	NOT AVAILABLE	NO	NOT AVAILABLE	NO	NOT AVAILABLE	NO	NOT AVAILABLE	NOT AVAILABLE	2	1	2	0	3	1	0	2	1	1	1	0	2	1	2	3	2	0	1	0	0	1	3	3
145	FEMALE	0.55NOT AVAILABLE65782219227	Chinese	16	LORRY DRIVER	PRIVATE STAFF	CLERK	GOVERNMENT SERVANT	NOT AVAILABLE	3000	M	SS	SS	NOT AVAILABLE	4	NO	NOT AVAILABLE	NO	NOT AVAILABLE	NO	NOT AVAILABLE	NO	NOT AVAILABLE	NOT AVAILABLE	2	0	2	0	3	1	0	2	0	0	0	0	2	1	3	3	3	0	2	0	0	2	2	2
147	MALE	0.796752027245NOT AVAILABLE3	Chinese	16	SELF-EMPLOYED	SELF-EMPLOYED	HOUSEWIFE	HOUSEWIFE	NOT AVAILABLE	3000	M	SS	DIP	NOT AVAILABLE	3	NO	NOT AVAILABLE	NO	NOT AVAILABLE	NO	NOT AVAILABLE	YES	MOTHER	NOT AVAILABLE	3	2	1	0	1	3	0	3	0	1	3	0	2	3	1	3	3	0	3	0	0	1	1	3
172	MALE	0.77419	Malay	14	STOREKEEPER	PRIVATE STAFF	CLERK	GOVERNMENT SERVANT	NOT AVAILABLE	3000	M	SS	SS	NOT AVAILABLE	2	NO	NOT AVAILABLE	NO	NOT AVAILABLE	NO	NOT AVAILABLE	YES	FATHER	HYPERTENSION	0	1	1	0	3	1	0	2	0	1	3	3	3	3	2	1	3	0	0	1	0	0	1	2
180	FEMALE	0.4907210814388NOT AVAILABLE	Chinese	13	NOT AVAILABLE	NOT AVAILABLE	CLERK	GOVERNMENT SERVANT	NOT AVAILABLE	3000	M	SS	SS	NOT AVAILABLE	2	NO	NOT AVAILABLE	NO	NOT AVAILABLE	NO	NOT AVAILABLE	NO	NOT AVAILABLE	NOT AVAILABLE	0	1	2	1	3	3	0	2	1	0	3	1	2	2	1	2	3	1	1	2	0	1	1	1
182	FEMALE	0.975731	Chinese	13	LORRY DRIVER	PRIVATE STAFF	HOUSEWIFE	HOUSEWIFE	NOT AVAILABLE	3000	M	SS	SS	NOT AVAILABLE	3	NO	NOT AVAILABLE	NO	NOT AVAILABLE	NO	NOT AVAILABLE	NO	NOT AVAILABLE	NOT AVAILABLE	0	1	2	0	2	3	0	3	1	0	0	0	2	2	2	3	3	0	0	0	1	3	2	2
206	MALE	0.484063	Malay	16	GOVERNMENT SERVANT	GOVERNMENT SERVANT	HOUSEWIFE	HOUSEWIFE	NOT AVAILABLE	3000	M	SS	SS	NOT AVAILABLE	5	NO	NOT AVAILABLE	NO	NOT AVAILABLE	NO	NOT AVAILABLE	NO	NOT AVAILABLE	NOT AVAILABLE	1	2	3	0	3	1	0	2	0	3	0	0	1	0	2	2	3	0	0	1	1	2	3	3
217	FEMALE	0.933004	Malay	16	FIREFIGHTER	GOVERNMENT SERVANT	HOUSEWIFE	HOUSEWIFE	NOT AVAILABLE	3000	M	DIP	SS	NOT AVAILABLE	1	NO	NOT AVAILABLE	NO	NOT AVAILABLE	NO	NOT AVAILABLE	NO	NOT AVAILABLE	NOT AVAILABLE	1	0	3	0	3	1	0	3	0	3	0	0	1	2	2	2	3	0	0	0	0	0	3	2
219	FEMALE	0.887448	Malay	16	CONTRACTOR	SELF-EMPLOYED	SUPERVISOR	PRIVATE STAFF	NOT AVAILABLE	3000	M	SS	SS	NOT AVAILABLE	5	NO	NOT AVAILABLE	NO	NOT AVAILABLE	NO	NOT AVAILABLE	NO	NOT AVAILABLE	NOT AVAILABLE	1	0	3	0	2	2	0	3	3	2	2	1	2	1	2	3	3	0	1	0	0	3	2	3
264	MALE	0.660214	Malay	14	SELF-EMPLOYED	SELF-EMPLOYED	STALL OPERATOR	PRIVATE STAFF	NOT AVAILABLE	3000	M	SS	SS	PS	5	YES	AUNT	YES	FATHER	NO	NOT AVAILABLE	NO	NOT AVAILABLE	NOT AVAILABLE	2	1	1	0	3	0	0	1	0	2	3	0	2	0	2	3	2	0	0	1	0	2	3	2
290	MALE	0.8782040373506NOT AVAILABLE	Malay	15	MECHANIC	PRIVATE STAFF	HOUSEWIFE	HOUSEWIFE	NOT AVAILABLE	3000	M	DEG	DIP	NOT AVAILABLE	4	NO	NOT AVAILABLE	NO	NOT AVAILABLE	NO	NOT AVAILABLE	NO	NOT AVAILABLE	NOT AVAILABLE	0	0	1	0	3	0	0	2	0	1	0	1	2	0	2	3	1	0	0	0	1	1	1	3
291	MALE	0.769592	Chinese	15	NOT AVAILABLE	NOT AVAILABLE	TEACHER	GOVERNMENT SERVANT	NOT AVAILABLE	3000	D	SS	DEG	NOT AVAILABLE	1	NO	NOT AVAILABLE	NO	NOT AVAILABLE	NO	NOT AVAILABLE	YES	NOT AVAILABLE	THALASSEMIA	0	2	1	3	1	3	3	1	1	3	2	3	0	1	1	3	2	1	1	0	3	3	1	0
334	FEMALE	0.817627	Malay	15	FORESTRY WORKER	GOVERNMENT SERVANT	HOUSEWIFE	HOUSEWIFE	NOT AVAILABLE	3000	M	DIP	DIP	NOT AVAILABLE	7	NO	NOT AVAILABLE	NO	NOT AVAILABLE	NO	NOT AVAILABLE	YES	FATHER; MOTHER	DIABETES; DYSLIPIDEMIA	1	1	3	1	2	0	0	2	0	0	0	2	0	0	3	2	3	0	1	1	1	1	2	2
357	FEMALE	0.945136	Malay	13	POLICEMAN	GOVERNMENT SERVANT	HOUSEWIFE	HOUSEWIFE	NOT AVAILABLE	3000	M	SS	SS	NOT AVAILABLE	2	NO	NOT AVAILABLE	NO	NOT AVAILABLE	NO	NOT AVAILABLE	NO	NOT AVAILABLE	NOT AVAILABLE	1	0	3	0	3	3	1	2	0	3	0	0	1	0	3	3	3	0	0	0	0	2	3	3
369	FEMALE	0.526764	Chinese	14	BUSINESSMAN	BUSINESSMAN	HAIRDRESSER	PRIVATE STAFF	NOT AVAILABLE	3000	D	SS	SS	NOT AVAILABLE	2	NO	NOT AVAILABLE	NO	NOT AVAILABLE	NO	NOT AVAILABLE	NO	NOT AVAILABLE	NOT AVAILABLE	2	1	1	1	2	1	0	1	1	2	0	0	2	2	1	2	2	0	1	1	0	1	1	2
370	FEMALE	0.585147	Chinese	14	MECHANIC	PRIVATE STAFF	HOUSEWIFE	HOUSEWIFE	NOT AVAILABLE	3000	M	SS	SS	NOT AVAILABLE	3	NO	NOT AVAILABLE	NO	NOT AVAILABLE	NO	NOT AVAILABLE	NO	NOT AVAILABLE	NOT AVAILABLE	1	0	1	0	0	1	0	1	1	3	1	0	1	2	1	2	2	1	1	1	0	0	1	1
118	FEMALE	0.949151	Chinese	16	HAWKER	SELF-EMPLOYED	HOUSEWIFE	HOUSEWIFE	NOT AVAILABLE	3100	M	SS	SS	NOT AVAILABLE	3	NO	NOT AVAILABLE	NO	NOT AVAILABLE	NO	NOT AVAILABLE	YES	NOT AVAILABLE	DIABETES	3	1	2	1	2	0	1	2	0	2	0	0	2	2	2	1	1	0	2	0	0	2	2	3
139	FEMALE	0.937258	Chinese	16	MECHANIC	PRIVATE STAFF	HOUSEWIFE	HOUSEWIFE	NOT AVAILABLE	3100	M	SS	SS	NOT AVAILABLE	1	NO	NOT AVAILABLE	NO	NOT AVAILABLE	NO	NOT AVAILABLE	NO	NOT AVAILABLE	NOT AVAILABLE	1	1	2	0	2	1	0	1	0	1	0	1	2	1	2	2	2	0	1	0	0	1	1	2
330	FEMALE	0.463038	Malay	15	FIREFIGHTER	GOVERNMENT SERVANT	HOUSEWIFE	HOUSEWIFE	NOT AVAILABLE	3200	M	SS	SS	NOT AVAILABLE	4	NO	NOT AVAILABLE	NO	NOT AVAILABLE	NO	NOT AVAILABLE	NO	NOT AVAILABLE	NOT AVAILABLE	0	1	2	0	3	1	0	3	1	1	1	1	2	1	3	1	3	0	1	2	0	0	1	2
42	FEMALE	0.541485	Chinese	14	HAWKER	SELF-EMPLOYED	CLERK	GOVERNMENT SERVANT	NOT AVAILABLE	3500	M	SS	SS	NOT AVAILABLE	1	NO	NOT AVAILABLE	NO	NOT AVAILABLE	NO	NOT AVAILABLE	NO	NOT AVAILABLE	NOT AVAILABLE	2	0	3	0	3	2	0	3	0	1	0	0	2	1	2	3	3	0	1	0	2	2	3	3
69	FEMALE	0.760219	Malay	16	LORRY DRIVER	PRIVATE STAFF	CLERK	GOVERNMENT SERVANT	NOT AVAILABLE	3500	M	SS	SS	NOT AVAILABLE	4	NO	NOT AVAILABLE	NO	NOT AVAILABLE	NO	NOT AVAILABLE	NO	NOT AVAILABLE	NOT AVAILABLE	1	1	2	1	2	2	0	2	1	0	1	3	2	2	3	2	2	1	1	1	1	1	2	2
116	FEMALE	0.605195	Chinese	15	BUSSINESSMAN	BUSINESSMAN	NOT AVAILABLE	NOT AVAILABLE	NOT AVAILABLE	3500	M	SS	SS	NOT AVAILABLE	2	NO	NOT AVAILABLE	NO	NOT AVAILABLE	NO	NOT AVAILABLE	NO	NOT AVAILABLE	NOT AVAILABLE	2	1	1	1	1	2	1	2	1	1	1	1	2	2	2	3	2	1	2	1	1	1	2	2
281	FEMALE	0.NOT AVAILABLE8253271218655	Chinese	15	MECHANIC	PRIVATE STAFF	HOUSEWIFE	HOUSEWIFE	NOT AVAILABLE	3500	M	SS	SS	NOT AVAILABLE	5	NO	NOT AVAILABLE	NO	NOT AVAILABLE	NO	NOT AVAILABLE	NO	NOT AVAILABLE	NOT AVAILABLE	0	1	3	0	3	3	0	3	1	0	0	0	1	2	3	2	3	0	0	0	0	3	3	3
355	MALE	0.73933NOT AVAILABLE80303441	Chinese	13	SALESMAN	PRIVATE STAFF	ONLINE SELLER	SELF-EMPLOYED	NOT AVAILABLE	3500	M	DEG	DEG	NOT AVAILABLE	3	NO	NOT AVAILABLE	NO	NOT AVAILABLE	NO	NOT AVAILABLE	NO	NOT AVAILABLE	NOT AVAILABLE	3	3	0	3	2	0	0	0	0	0	0	0	0	0	0	0	0	0	0	0	0	0	0	0
358	FEMALE	0.54289	Chinese	13	GROCERER	PRIVATE STAFF	PART-TIME WORKER	SELF-EMPLOYED	NOT AVAILABLE	3500	S	SS	SS	NOT AVAILABLE	3	NO	NOT AVAILABLE	NO	NOT AVAILABLE	NO	NOT AVAILABLE	NO	NOT AVAILABLE	NOT AVAILABLE	2	1	1	1	1	1	0	0	0	0	1	1	0	1	0	0	0	0	0	0	1	1	0	1
186	MALE	0.717462	Malay	13	POLICEMAN	GOVERNMENT SERVANT	HOUSEWIFE	HOUSEWIFE	NOT AVAILABLE	3600	M	SS	SS	NOT AVAILABLE	5	NO	NOT AVAILABLE	NO	NOT AVAILABLE	NO	NOT AVAILABLE	NO	NOT AVAILABLE	NOT AVAILABLE	1	2	3	0	0	0	0	3	0	2	0	0	2	0	3	2	2	0	0	0	0	1	3	3
301	MALE	0.63012	Malay	15	RELA GUARD	GOVERNMENT SERVANT	CLERK	GOVERNMENT SERVANT	NOT AVAILABLE	3600	M	SS	SS	NOT AVAILABLE	2	NO	NOT AVAILABLE	NO	NOT AVAILABLE	NO	NOT AVAILABLE	YES	MOTHER	NOT AVAILABLE	1	1	2	0	3	2	1	2	3	3	0	1	2	1	2	3	3	0	1	0	0	2	2	3
109	MALE	0.816494401153NOT AVAILABLE4	Chinese	15	LABORER	PRIVATE STAFF	PROMOTER	PRIVATE STAFF	NOT AVAILABLE	3800	M	SS	SS	NOT AVAILABLE	1	NO	NOT AVAILABLE	NO	NOT AVAILABLE	NO	NOT AVAILABLE	YES	NOT AVAILABLE	NOT AVAILABLE	2	0	2	0	1	1	0	1	0	2	0	0	3	3	3	2	3	0	0	2	2	0	3	2
325	FEMALE	0.81509177265NOT AVAILABLE35	Malay	15	COUNCIL WORKER	GOVERNMENT SERVANT	COUNCIL WORKER	GOVERNMENT SERVANT	NOT AVAILABLE	3800	M	SS	SS	NOT AVAILABLE	2	NO	NOT AVAILABLE	NO	NOT AVAILABLE	NO	NOT AVAILABLE	NO	NOT AVAILABLE	NOT AVAILABLE	1	1	2	0	3	2	0	2	0	1	0	1	1	0	2	1	3	0	1	2	1	3	1	3
328	FEMALE	0.NOT AVAILABLE7378855989542	Malay	15	SELF-EMPLOYED	SELF-EMPLOYED	PERSONAL ASSISTANT	PRIVATE STAFF	NOT AVAILABLE	3900	M	SS	DIP	NOT AVAILABLE	4	NO	NOT AVAILABLE	NO	NOT AVAILABLE	NO	NOT AVAILABLE	NO	NOT AVAILABLE	NOT AVAILABLE	1	1	3	0	3	2	1	3	0	2	1	0	1	1	2	3	3	0	0	0	0	2	1	2
7	FEMALE	0.668789	Malay	13	SELF-EMPLOYED	SELF-EMPLOYED	TEACHER	GOVERNMENT SERVANT	SELF-EMPLOYED	4000	M	SS	PG	DEG	4	NO	NOT AVAILABLE	NO	NOT AVAILABLE	NO	NOT AVAILABLE	NO	NOT AVAILABLE	NOT AVAILABLE	1	1	3	0	2	0	2	2	0	1	1	0	2	0	3	2	2	0	1	0	0	0	3	1
44	FEMALE	0.866344	Chinese	14	WELDER	PRIVATE STAFF	HOUSEWIFE	HOUSEWIFE	NOT AVAILABLE	4000	M	SS	SS	NOT AVAILABLE	3	NO	NOT AVAILABLE	NO	NOT AVAILABLE	NO	NOT AVAILABLE	NO	NOT AVAILABLE	NOT AVAILABLE	2	0	2	0	3	1	0	3	0	2	0	0	3	1	2	3	3	0	2	0	0	2	2	2
106	FEMALE	0.879234	Malay	15	WIREMAN	PRIVATE STAFF	HOUSEWIFE	HOUSEWIFE	NOT AVAILABLE	4000	M	SS	SS	NOT AVAILABLE	8	NO	NOT AVAILABLE	YES	UNCLE	YES	UNCLE	YES	COUSIN	NOT AVAILABLE	2	1	3	1	2	1	1	3	0	3	0	0	3	3	3	3	3	0	2	1	1	2	3	3
161	FEMALE	0.714609	Chinese	14	CONSTRUCTION WORK	PRIVATE STAFF	NOT AVAILABLE	NOT AVAILABLE	NOT AVAILABLE	4000	M	SS	SS	NOT AVAILABLE	2	NO	NOT AVAILABLE	NO	NOT AVAILABLE	NO	NOT AVAILABLE	NO	NOT AVAILABLE	NOT AVAILABLE	1	0	2	1	3	2	2	2	0	0	1	1	1	1	1	1	1	1	1	1	2	3	3	3
187	MALE	0.50855	Malay	13	SALESMAN	PRIVATE STAFF	HOUSEWIFE	HOUSEWIFE	NOT AVAILABLE	4000	M	SS	SS	NOT AVAILABLE	2	NO	NOT AVAILABLE	NO	NOT AVAILABLE	NO	NOT AVAILABLE	YES	FATHER	ASTHMA	0	0	2	0	2	3	0	2	0	2	0	0	0	0	3	3	3	1	0	0	0	3	3	3
233	MALE	0.516429	Malay	13	INSURANCE AGENT	PRIVATE STAFF	HOUSEWIFE	HOUSEWIFE	NOT AVAILABLE	4000	M	DEG	DEG	NOT AVAILABLE	4	NO	NOT AVAILABLE	NO	NOT AVAILABLE	NO	NOT AVAILABLE	NO	NOT AVAILABLE	NOT AVAILABLE	2	2	3	0	3	1	2	2	0	0	0	0	2	2	3	2	2	0	2	0	0	0	1	2
234	MALE	0.827527	Malay	13	GOVERNMENT SERVANT	GOVERNMENT SERVANT	NOT AVAILABLE	NOT AVAILABLE	NOT AVAILABLE	4000	M	SS	DIP	NOT AVAILABLE	4	NO	NOT AVAILABLE	NO	NOT AVAILABLE	NO	NOT AVAILABLE	YES	NOT AVAILABLE	HYPERTENSION	1	2	3	2	1	1	0	1	2	1	1	0	3	0	2	1	2	2	1	0	1	2	3	2
253	MALE	0.601NOT AVAILABLE1639373983	Malay	14	FORESTRY WORKER	GOVERNMENT SERVANT	CLERK	GOVERNMENT SERVANT	NOT AVAILABLE	4000	D	SS	SS	NOT AVAILABLE	7	NO	NOT AVAILABLE	NO	NOT AVAILABLE	NO	NOT AVAILABLE	NO	NOT AVAILABLE	NOT AVAILABLE	0	0	0	0	0	0	0	0	0	0	0	0	0	0	1	2	0	0	0	0	1	0	1	0
287	MALE	0.NOT AVAILABLE159730230495	Malay	15	JKR OFFICER	GOVERNMENT SERVANT	FORESTRY WORKER	GOVERNMENT SERVANT	NOT AVAILABLE	4000	M	NOT AVAILABLE	NOT AVAILABLE	NOT AVAILABLE	2	NO	NOT AVAILABLE	NO	NOT AVAILABLE	NO	NOT AVAILABLE	NO	NOT AVAILABLE	NOT AVAILABLE	2	1	3	0	3	0	0	2	0	0	0	0	1	2	2	0	2	0	1	0	0	2	1	2
400	FEMALE	0.716986300773NOT AVAILABLE7	Malay	13	SELF-EMPLOYED	SELF-EMPLOYED	NURSE	GOVERNMENT SERVANT	NOT AVAILABLE	4000	M	SS	DIP	NOT AVAILABLE	3	NO	NOT AVAILABLE	NO	NOT AVAILABLE	NO	NOT AVAILABLE	NO	NOT AVAILABLE	NOT AVAILABLE	0	0	3	0	0	1	0	3	0	2	0	0	2	0	3	2	2	0	0	0	0	1	3	3
407	MALE	0.5466555337NOT AVAILABLE208	Indian	16	SUPERVISOR	PRIVATE STAFF	HOUSEWIFE	HOUSEWIFE	NOT AVAILABLE	4000	M	DEG	DEG	NOT AVAILABLE	4	NO	NOT AVAILABLE	NO	NOT AVAILABLE	NO	NOT AVAILABLE	NO	NOT AVAILABLE	NOT AVAILABLE	1	2	3	3	1	0	0	2	0	1	2	2	0	1	3	1	0	2	2	0	3	2	0	0
45	MALE	0.93613NOT AVAILABLE01834902	Chinese	14	MANAGER	PRIVATE STAFF	CLERK	GOVERNMENT SERVANT	NOT AVAILABLE	4300	M	SS	DIP	NOT AVAILABLE	2	NO	NOT AVAILABLE	NO	NOT AVAILABLE	NO	NOT AVAILABLE	YES	FATHER	HYPERTENSION	1	0	1	1	3	1	0	3	0	0	1	0	1	0	0	1	1	0	0	0	0	2	1	1
25	FEMALE	0.573529	Chinese	14	MANAGER	PRIVATE STAFF	HOUSEWIFE	HOUSEWIFE	NOT AVAILABLE	4500	M	SS	SS	NOT AVAILABLE	1	NO	NOT AVAILABLE	NO	NOT AVAILABLE	NO	NOT AVAILABLE	NO	NOT AVAILABLE	NOT AVAILABLE	1	1	3	1	3	3	0	2	0	2	1	1	3	0	2	3	3	1	0	1	0	0	3	3
119	FEMALE	0.510466	Chinese	16	PROMOTER	PRIVATE STAFF	PROMOTER	PRIVATE STAFF	NOT AVAILABLE	4500	M	SS	SS	NOT AVAILABLE	1	NO	NOT AVAILABLE	NO	NOT AVAILABLE	NO	NOT AVAILABLE	NO	NOT AVAILABLE	NOT AVAILABLE	1	0	1	1	2	1	0	2	0	1	0	0	2	1	2	1	1	0	2	0	1	2	3	3
127	FEMALE	0.519048	Chinese	16	BUSSINESSMAN	BUSINESSMAN	CHEF	PRIVATE STAFF	NOT AVAILABLE	4500	M	SS	SS	NOT AVAILABLE	4	NO	NOT AVAILABLE	NO	NOT AVAILABLE	NO	NOT AVAILABLE	NO	NOT AVAILABLE	NOT AVAILABLE	1	1	2	2	2	0	1	3	1	1	0	0	2	3	2	3	3	2	3	1	0	1	2	3
201	FEMALE	0.692009	Chinese	16	MECHANIC	PRIVATE STAFF	HOUSEWIFE	HOUSEWIFE	NOT AVAILABLE	4500	M	SS	SS	NOT AVAILABLE	5	NO	NOT AVAILABLE	NO	NOT AVAILABLE	NO	NOT AVAILABLE	NO	NOT AVAILABLE	NOT AVAILABLE	3	0	2	0	3	1	0	2	0	1	0	0	2	3	2	3	0	0	3	0	1	0	2	3
250	MALE	0.725496	Malay	14	BANKER	PRIVATE STAFF	SELF-EMPLOYED	SELF-EMPLOYED	NOT AVAILABLE	4500	M	DEG	DIP	NOT AVAILABLE	4	NO	NOT AVAILABLE	NO	NOT AVAILABLE	NO	NOT AVAILABLE	NO	NOT AVAILABLE	NOT AVAILABLE	0	2	3	0	2	1	0	3	2	1	0	1	2	1	3	1	3	0	1	0	0	2	3	3
270	MALE	0.710014	Malay	14	BUSINESSMAN	BUSINESSMAN	CHEF	PRIVATE STAFF	NOT AVAILABLE	4500	M	SS	SS	NOT AVAILABLE	5	NO	NOT AVAILABLE	NO	NOT AVAILABLE	NO	NOT AVAILABLE	NO	NOT AVAILABLE	NOT AVAILABLE	2	1	0	0	3	1	3	1	0	1	0	0	0	0	2	0	0	0	0	0	3	0	3	3
305	FEMALE	0.549726	Malay	15	SELF-EMPLOYED	SELF-EMPLOYED	HOUSEWIFE	HOUSEWIFE	NOT AVAILABLE	4500	M	DEG	SS	NOT AVAILABLE	4	NO	NOT AVAILABLE	NO	NOT AVAILABLE	NO	NOT AVAILABLE	NO	NOT AVAILABLE	NOT AVAILABLE	0	1	1	1	1	2	1	1	1	2	2	3	0	0	1	2	1	1	0	0	1	3	1	1
349	FEMALE	0.7NOT AVAILABLE020545030229	Malay	15	UNEMPLOYED	UNEMPLOYED	TEACHER	GOVERNMENT SERVANT	NOT AVAILABLE	4500	M	SS	DEG	NOT AVAILABLE	7	NO	NOT AVAILABLE	NO	NOT AVAILABLE	YES	BROTHER	YES	FATHER	DIABETES	0	1	3	0	3	1	0	3	0	3	0	0	2	1	3	3	2	0	0	0	0	2	3	3
367	FEMALE	0.609824	Chinese	14	LABORER	PRIVATE STAFF	AUDITOR	PRIVATE STAFF	NOT AVAILABLE	4500	M	SS	SS	NOT AVAILABLE	2	NO	NOT AVAILABLE	NO	NOT AVAILABLE	NO	NOT AVAILABLE	NO	NOT AVAILABLE	NOT AVAILABLE	2	1	1	0	2	1	1	3	2	1	1	1	2	2	1	2	3	2	1	1	1	1	1	2
380	FEMALE	0.718NOT AVAILABLE1044707333	Malay	15	UNEMPLOYED	UNEMPLOYED	ACCOUNTANT	PRIVATE STAFF	NOT AVAILABLE	4500	D	SS	DIP	NOT AVAILABLE	3	NO	NOT AVAILABLE	NO	NOT AVAILABLE	NO	NOT AVAILABLE	NO	NOT AVAILABLE	NOT AVAILABLE	0	1	2	0	3	3	1	3	0	1	0	1	1	1	2	2	3	0	3	0	0	3	3	3
387	FEMALE	0.538586	Malay	15	QUANTITY SURVEYOR	PRIVATE STAFF	HOUSEWIFE	HOUSEWIFE	NOT AVAILABLE	4500	M	DIP	DIP	NOT AVAILABLE	3	NO	NOT AVAILABLE	NO	NOT AVAILABLE	NO	NOT AVAILABLE	NO	NOT AVAILABLE	NOT AVAILABLE	1	2	3	3	0	2	0	0	1	2	1	3	1	1	2	1	1	1	1	1	3	3	2	1
252	MALE	0.960886	Malay	14	MARITIME OFFICER	GOVERNMENT SERVANT	RTM WORKER	GOVERNMENT SERVANT	NOT AVAILABLE	4700	M	SS	SS	NOT AVAILABLE	3	NO	NOT AVAILABLE	NO	NOT AVAILABLE	NO	NOT AVAILABLE	NO	NOT AVAILABLE	NOT AVAILABLE	1	2	0	1	3	3	0	1	0	2	2	1	0	0	3	3	1	0	0	1	2	3	3	2
8	FEMALE	0.804443	Chinese	13	ACCOUNTANT	PRIVATE STAFF	HOUSEWIFE	HOUSEWIFE	NOT AVAILABLE	5000	M	DIP	SS	NOT AVAILABLE	2	NO	NOT AVAILABLE	NO	NOT AVAILABLE	NO	NOT AVAILABLE	NO	NOT AVAILABLE	NOT AVAILABLE	1	1	1	0	1	2	0	1	1	2	1	1	2	1	2	1	1	1	0	1	1	2	1	2
22	FEMALE	0.961585	Chinese	14	MECHANIC	PRIVATE STAFF	CLERK	GOVERNMENT SERVANT	NOT AVAILABLE	5000	M	SS	DIP	NOT AVAILABLE	3	NO	NOT AVAILABLE	NO	NOT AVAILABLE	NO	NOT AVAILABLE	YES	NOT AVAILABLE	HYPERTENSION	1	1	3	0	3	1	0	2	0	1	1	0	1	2	1	1	3	0	1	1	1	2	1	3
101	MALE	0.75796	Malay	15	TEACHER	GOVERNMENT SERVANT	TEACHER	GOVERNMENT SERVANT	NOT AVAILABLE	5000	M	DEG	DEG	NOT AVAILABLE	4	NO	NOT AVAILABLE	NO	NOT AVAILABLE	NO	NOT AVAILABLE	NO	NOT AVAILABLE	NOT AVAILABLE	2	0	1	2	2	3	0	1	0	0	0	0	1	0	1	2	1	0	0	0	0	1	2	1
103	MALE	0.833173	Malay	15	SELF-EMPLOYED	SELF-EMPLOYED	GOVERNMENT SERVANT	GOVERNMENT SERVANT	NOT AVAILABLE	5000	M	SS	DIP	NOT AVAILABLE	4	NO	NOT AVAILABLE	NO	NOT AVAILABLE	NO	NOT AVAILABLE	YES	MOTHER	HYPERTENSION	0	1	2	0	3	2	0	2	0	0	0	1	2	2	3	2	2	0	0	0	0	1	2	3
148	MALE	0.708602	Chinese	16	BUSSINESSMAN	BUSINESSMAN	NOT AVAILABLE	NOT AVAILABLE	NOT AVAILABLE	5000	M	SS	DIP	NOT AVAILABLE	1	NO	NOT AVAILABLE	NO	NOT AVAILABLE	NO	NOT AVAILABLE	NO	NOT AVAILABLE	NOT AVAILABLE	1	1	2	0	2	3	0	2	1	1	1	1	2	1	2	2	3	1	0	1	0	0	1	1
160	FEMALE	0.49524	Chinese	14	LORRY DRIVER	PRIVATE STAFF	CLERK	GOVERNMENT SERVANT	NOT AVAILABLE	5000	M	DIP	M	NOT AVAILABLE	3	NO	NOT AVAILABLE	NO	NOT AVAILABLE	NO	NOT AVAILABLE	NO	NOT AVAILABLE	NOT AVAILABLE	3	1	1	1	2	1	0	2	1	1	0	1	2	1	1	3	2	0	1	2	0	2	2	1
225	FEMALE	0.92381	Malay	13	SELF-EMPLOYED	SELF-EMPLOYED	HOUSEWIFE	HOUSEWIFE	NOT AVAILABLE	5000	M	SS	SS	NOT AVAILABLE	5	NO	NOT AVAILABLE	NO	NOT AVAILABLE	NO	NOT AVAILABLE	NO	NOT AVAILABLE	NOT AVAILABLE	2	1	1	2	3	2	0	2	0	1	0	0	1	1	2	3	3	0	0	0	0	2	1	3
286	MALE	0.680607	Malay	15	FORESTRY WORKER	GOVERNMENT SERVANT	TEACHER	GOVERNMENT SERVANT	NOT AVAILABLE	5000	M	DIP	PG	NOT AVAILABLE	999	NO	NOT AVAILABLE	NO	NOT AVAILABLE	NO	NOT AVAILABLE	NO	NOT AVAILABLE	NOT AVAILABLE	0	0	2	0	3	1	1	1	1	2	0	0	0	0	3	1	2	0	0	0	1	2	2	2
300	FEMALE	0.56243896020NOT AVAILABLE86	Malay	15	NOT AVAILABLE	NOT AVAILABLE	KWSP OFFICER	GOVERNMENT SERVANT	NOT AVAILABLE	5000	M	NOT AVAILABLE	SS	NOT AVAILABLE	999	NO	NOT AVAILABLE	NO	NOT AVAILABLE	NO	NOT AVAILABLE	NO	NOT AVAILABLE	NOT AVAILABLE	1	2	2	0	1	2	2	1	0	2	2	0	1	0	2	1	3	2	2	0	0	2	2	1
303	MALE	0.819454	Malay	15	LORRY DRIVER	PRIVATE STAFF	HOUSEWIFE	HOUSEWIFE	SELF-EMPLOYED	5000	M	SS	DIP	DEG	2	NO	NOT AVAILABLE	NO	NOT AVAILABLE	NO	NOT AVAILABLE	YES	BROTHER	ASTHMA	2	1	3	0	3	1	2	3	0	1	0	0	2	1	3	3	3	0	1	0	0	2	3	3
324	MALE	0.827852	Malay	15	BUS DRIVER	PRIVATE STAFF	HOUSEWIFE	HOUSEWIFE	NOT AVAILABLE	5000	M	SS	DIP	NOT AVAILABLE	2	NO	NOT AVAILABLE	NO	NOT AVAILABLE	NO	NOT AVAILABLE	YES	MOTHER; FATHER	SINUSITIS; GOUT	2	1	3	0	3	0	0	2	0	1	0	0	2	2	3	3	2	0	1	0	0	1	3	2
336	FEMALE	0.959071	Malay	15	RETIREE ARMY	RETIREE	CLERK	GOVERNMENT SERVANT	NOT AVAILABLE	5000	M	SS	SS	NOT AVAILABLE	6	NO	NOT AVAILABLE	NO	NOT AVAILABLE	NO	NOT AVAILABLE	NO	NOT AVAILABLE	NOT AVAILABLE	1	1	2	1	2	1	1	3	0	1	0	1	2	1	2	2	3	0	1	0	0	1	2	2
375	FEMALE	0.834639	Malay	13	BAKER	PRIVATE STAFF	BUSINESSMAN	BUSINESSMAN	NOT AVAILABLE	5000	M	DIP	DIP	NOT AVAILABLE	1	NO	NOT AVAILABLE	NO	NOT AVAILABLE	NO	NOT AVAILABLE	NO	NOT AVAILABLE	NOT AVAILABLE	0	3	2	0	3	2	1	2	1	1	0	1	1	1	2	3	2	1	0	0	0	2	1	2
376	FEMALE	0.78439	Malay	14	SELF-EMPLOYED	SELF-EMPLOYED	SELF-EMPLOYED	SELF-EMPLOYED	NOT AVAILABLE	5000	M	DIP	SS	NOT AVAILABLE	5	NO	NOT AVAILABLE	NO	NOT AVAILABLE	NO	NOT AVAILABLE	NO	NOT AVAILABLE	NOT AVAILABLE	1	1	3	0	3	2	1	3	2	1	1	0	3	1	3	3	3	0	1	0	0	3	2	3
409	FEMALE	0.690561	Malay	16	MEDICAL ASSISTANT	GOVERNMENT SERVANT	CIVIL SERVANT	GOVERNMENT SERVANT	NOT AVAILABLE	5000	M	DIP	SS	NOT AVAILABLE	3	NO	NOT AVAILABLE	NO	NOT AVAILABLE	NO	NOT AVAILABLE	NO	NOT AVAILABLE	NOT AVAILABLE	3	3	0	0	3	1	1	3	1	1	2	0	0	1	1	3	1	2	0	2	0	3	1	3
184	MALE	0.702143	Chinese	13	BUSINESSMAN	BUSINESSMAN	SALESWOMAN	PRIVATE STAFF	NOT AVAILABLE	5500	M	SS	SS	NOT AVAILABLE	1	NO	NOT AVAILABLE	NO	NOT AVAILABLE	NO	NOT AVAILABLE	NO	NOT AVAILABLE	NOT AVAILABLE	2	2	2	2	1	1	0	1	1	1	0	0	1	2	3	3	3	2	2	2	0	1	2	3
62	FEMALE	0.700957	Malay	14	MECHANIC	PRIVATE STAFF	HOUSEWIFE	HOUSEWIFE	NOT AVAILABLE	6000	M	SS	SS	NOT AVAILABLE	9	NO	NOT AVAILABLE	NO	NOT AVAILABLE	YES	BROTHER	YES	BOTH PARENT	MULTIPLE	3	2	3	0	3	0	0	2	0	2	0	0	1	3	1	1	2	0	3	0	0	1	1	3
84	FEMALE	0.600489	Malay	15	SELF-EMPLOYED	SELF-EMPLOYED	SELF-EMPLOYED	SELF-EMPLOYED	NOT AVAILABLE	6000	D	SS	DIP	NOT AVAILABLE	4	NO	NOT AVAILABLE	NO	NOT AVAILABLE	NO	NOT AVAILABLE	NO	NOT AVAILABLE	NOT AVAILABLE	1	3	2	0	2	1	2	2	1	2	0	1	2	1	2	3	3	0	1	1	0	1	2	3
117	FEMALE	0.740407	Malay	14	GOVERNMENT SERVANT	GOVERNMENT SERVANT	GOVERNMENT SERVANT	GOVERNMENT SERVANT	NOT AVAILABLE	6000	M	SS	M	NOT AVAILABLE	3	NO	NOT AVAILABLE	NO	NOT AVAILABLE	NO	NOT AVAILABLE	NO	NOT AVAILABLE	NOT AVAILABLE	2	2	2	2	2	2	0	2	0	2	0	0	2	0	2	2	2	0	0	0	0	0	2	2
126	MALE	0.708968	Chinese	16	HAWKER	SELF-EMPLOYED	HAWKER	PRIVATE STAFF	NOT AVAILABLE	6000	S	SS	SS	NOT AVAILABLE	1	NO	NOT AVAILABLE	NO	NOT AVAILABLE	NO	NOT AVAILABLE	NO	NOT AVAILABLE	NOT AVAILABLE	1	1	1	2	2	2	1	2	1	1	1	1	2	1	1	1	2	0	1	1	0	1	1	1
207	MALE	0.528912	Malay	16	SELF-EMPLOYED	SELF-EMPLOYED	SELF-EMPLOYED	SELF-EMPLOYED	NOT AVAILABLE	6000	M	DIP	DIP	NOT AVAILABLE	5	NO	NOT AVAILABLE	NO	NOT AVAILABLE	NO	NOT AVAILABLE	NO	NOT AVAILABLE	NOT AVAILABLE	3	3	3	2	1	3	0	2	1	1	2	0	3	2	3	2	3	1	0	2	1	3	3	2
214	FEMALE	0.820633	Malay	16	GOVERNMENT SERVANT	GOVERNMENT SERVANT	HOUSEWIFE	HOUSEWIFE	NOT AVAILABLE	6000	M	DEG	SS	NOT AVAILABLE	9	NO	NOT AVAILABLE	NO	NOT AVAILABLE	NO	NOT AVAILABLE	NO	NOT AVAILABLE	NOT AVAILABLE	0	2	3	1	3	3	0	3	1	0	0	1	3	0	3	3	3	0	0	0	1	3	2	1
283	FEMALE	0.8084885232808NOT AVAILABLE	Malay	15	ENGINEER	PRIVATE STAFF	HOUSEWIFE	HOUSEWIFE	NOT AVAILABLE	6000	M	PG	DEG	NOT AVAILABLE	6	NO	NOT AVAILABLE	NO	NOT AVAILABLE	NO	NOT AVAILABLE	NO	NOT AVAILABLE	NOT AVAILABLE	1	2	2	0	3	0	0	3	0	1	0	0	2	0	2	3	3	0	0	0	0	2	2	3
341	MALE	0.478769	Malay	15	GRAB DRIVER	SELF-EMPLOYED	TEACHER	GOVERNMENT SERVANT	NOT AVAILABLE	6000	M	SS	DEG	NOT AVAILABLE	3	NO	NOT AVAILABLE	NO	NOT AVAILABLE	NO	NOT AVAILABLE	YES	FATHER	HYPERTENSION	1	1	3	1	1	1	1	2	2	1	2	1	2	1	2	1	2	2	0	0	0	1	2	1
363	FEMALE	0.479277	Chinese	13	CASINO WORKER	PRIVATE STAFF	NOT AVAILABLE	NOT AVAILABLE	NOT AVAILABLE	6000	D	SS	DIP	NOT AVAILABLE	5	NO	NOT AVAILABLE	NO	NOT AVAILABLE	NO	NOT AVAILABLE	NO	NOT AVAILABLE	NOT AVAILABLE	1	2	2	0	2	1	0	1	0	1	1	0	1	0	0	0	0	0	0	0	0	0	0	0
231	FEMALE	0.607613	Malay	13	SOLDIER	GOVERNMENT SERVANT	GOVERNMENT SERVANT	GOVERNMENT SERVANT	NOT AVAILABLE	7000	M	SS	SS	NOT AVAILABLE	5	NO	NOT AVAILABLE	NO	NOT AVAILABLE	NO	NOT AVAILABLE	NO	NOT AVAILABLE	NOT AVAILABLE	2	1	1	1	1	1	1	0	1	1	1	0	1	1	2	3	3	0	0	0	0	2	1	3
236	MALE	0.818734	Malay	13	SELF-EMPLOYED	SELF-EMPLOYED	BANKER	PRIVATE STAFF	NOT AVAILABLE	7000	M	DIP	DIP	NOT AVAILABLE	1	NO	NOT AVAILABLE	NO	NOT AVAILABLE	NO	NOT AVAILABLE	NO	NOT AVAILABLE	NOT AVAILABLE	1	0	1	2	0	1	1	0	1	0	0	0	0	1	2	0	1	1	0	0	0	0	1	1
254	MALE	0.988655	Malay	14	AIRLINE SALESREP	PRIVATE STAFF	FORESTRY WORKER	GOVERNMENT SERVANT	NOT AVAILABLE	7000	M	SS	SS	NOT AVAILABLE	6	NO	NOT AVAILABLE	NO	NOT AVAILABLE	NO	NOT AVAILABLE	NO	MOTHER	NOT AVAILABLE	1	2	2	1	0	1	0	3	1	99	0	0	3	99	3	3	1	0	0	1	99	2	3	3
259	FEMALE	0.670229	Malay	14	LECTURER	PRIVATE STAFF	HOUSEWIFE	HOUSEWIFE	NOT AVAILABLE	7000	M	PG	DEG	NOT AVAILABLE	6	NO	NOT AVAILABLE	NO	NOT AVAILABLE	NO	NOT AVAILABLE	NO	NOT AVAILABLE	NOT AVAILABLE	0	1	2	0	3	3	0	3	0	2	0	0	3	0	3	3	2	0	0	0	1	3	3	3
345	MALE	0.783223	Malay	15	TECHNICIAN	PRIVATE STAFF	CLERK	GOVERNMENT SERVANT	NOT AVAILABLE	7000	M	DEG	DEG	NOT AVAILABLE	4	NO	NOT AVAILABLE	NO	NOT AVAILABLE	NO	NOT AVAILABLE	NO	NOT AVAILABLE	NOT AVAILABLE	0	1	3	0	2	2	0	2	1	3	0	0	2	1	2	2	2	0	0	1	1	3	2	2
348	MALE	0.8931NOT AVAILABLE208896441	Malay	15	LECTURER	GOVERNMENT SERVANT	AAPK OFFICER	GOVERNMENT SERVANT	NOT AVAILABLE	7000	M	DEG	DIP	NOT AVAILABLE	5	NO	NOT AVAILABLE	NO	NOT AVAILABLE	NO	NOT AVAILABLE	NO	NOT AVAILABLE	NOT AVAILABLE	0	1	2	0	3	3	1	2	0	1	0	0	2	1	3	1	2	0	0	0	0	1	2	2
226	FEMALE	0.95NOT AVAILABLE08451897153	Malay	13	GOVERNMENT SERVANT	GOVERNMENT SERVANT	GOVERNMENT SERVANT	GOVERNMENT SERVANT	NOT AVAILABLE	7050	M	DIP	DIP	NOT AVAILABLE	2	NO	NOT AVAILABLE	YES	COUSIN	NO	NOT AVAILABLE	NO	NOT AVAILABLE	NOT AVAILABLE	1	2	1	1	1	1	1	0	1	1	1	0	0	0	1	1	1	0	1	1	1	0	1	1
284	FEMALE	0.458435	Malay	15	NOT AVAILABLE	NOT AVAILABLE	BANKER	PRIVATE STAFF	NOT AVAILABLE	7500	M	DEG	DIP	NOT AVAILABLE	4	NO	NOT AVAILABLE	NO	NOT AVAILABLE	NO	NOT AVAILABLE	NO	NOT AVAILABLE	NOT AVAILABLE	2	2	3	0	2	1	0	3	0	2	0	0	1	1	3	3	3	0	1	0	0	2	3	3
272	FEMALE	0.690484	Malay	15	GENERAL WORKER	GOVERNMENT SERVANT	CLERK	GOVERNMENT SERVANT	NOT AVAILABLE	7600	M	DIP	DIP	NOT AVAILABLE	4	NO	NOT AVAILABLE	NO	NOT AVAILABLE	NO	NOT AVAILABLE	NO	NOT AVAILABLE	NOT AVAILABLE	0	1	2	0	2	99	0	2	0	1	1	1	2	1	2	1	2	0	0	0	0	1	1	2
11	MALE	0.693356	Malay	16	ENGINEER	PRIVATE STAFF	HOUSEWIFE	HOUSEWIFE	NOT AVAILABLE	8000	M	PG	DEG	NOT AVAILABLE	5	YES	BROTHER	NO	NOT AVAILABLE	NO	NOT AVAILABLE	NO	NOT AVAILABLE	NOT AVAILABLE	1	2	1	1	3	2	1	2	1	2	1	0	2	0	1	1	2	0	0	1	0	0	1	2
88	FEMALE	0.456388	Malay	16	GOVERNMENT SERVANT	GOVERNMENT SERVANT	HAWKER	PRIVATE STAFF	NOT AVAILABLE	8000	M	DIP	DIP	NOT AVAILABLE	6	NO	NOT AVAILABLE	NO	NOT AVAILABLE	NO	NOT AVAILABLE	NO	NOT AVAILABLE	NOT AVAILABLE	0	2	2	2	3	0	0	1	0	1	0	2	1	0	1	3	3	0	0	0	1	3	1	3
104	MALE	0.5NOT AVAILABLE666840864NOT AVAILABLE3	Chinese	15	NOT AVAILABLE	NOT AVAILABLE	BANKER	PRIVATE STAFF	NOT AVAILABLE	8000	M	DIP	DIP	NOT AVAILABLE	3	NO	NOT AVAILABLE	NO	NOT AVAILABLE	NO	NOT AVAILABLE	NO	NOT AVAILABLE	NOT AVAILABLE	2	2	3	2	2	1	0	2	1	2	1	1	2	1	3	2	2	1	1	2	2	1	3	2
125	MALE	0.969864	Malay	16	TEACHER	GOVERNMENT SERVANT	TEACHER	GOVERNMENT SERVANT	NOT AVAILABLE	8000	M	DIP	DIP	NOT AVAILABLE	6	NO	NOT AVAILABLE	NO	NOT AVAILABLE	NO	NOT AVAILABLE	NO	NOT AVAILABLE	NOT AVAILABLE	1	2	2	2	1	1	1	1	1	2	1	0	1	1	2	3	1	1	1	1	2	2	2	3
176	FEMALE	0.522117	Chinese	14	ELECTRICIAN	PRIVATE STAFF	TEACHER	GOVERNMENT SERVANT	NOT AVAILABLE	8000	S	SS	DIP	NOT AVAILABLE	3	NO	NOT AVAILABLE	NO	NOT AVAILABLE	NO	NOT AVAILABLE	YES	NOT AVAILABLE	NOT AVAILABLE	1	1	2	0	0	1	0	2	0	3	1	0	2	1	2	3	3	1	3	2	2	1	2	2
222	FEMALE	0.656304	Malay	16	GOVERNMENT SERVANT	GOVERNMENT SERVANT	GOVERNMENT SERVANT	GOVERNMENT SERVANT	NOT AVAILABLE	8000	M	DIP	PG	NOT AVAILABLE	3	NO	NOT AVAILABLE	NO	NOT AVAILABLE	NO	NOT AVAILABLE	NO	NOT AVAILABLE	NOT AVAILABLE	1	2	1	0	3	0	1	2	3	3	0	3	1	0	3	1	3	1	3	2	3	3	3	3
307	MALE	0.746119	Malay	15	TEACHER	GOVERNMENT SERVANT	TEACHER	GOVERNMENT SERVANT	NOT AVAILABLE	8000	M	DEG	DEG	NOT AVAILABLE	5	NO	NOT AVAILABLE	NO	NOT AVAILABLE	NO	NOT AVAILABLE	NO	NOT AVAILABLE	NOT AVAILABLE	2	0	1	0	3	1	0	2	0	0	1	2	3	1	1	3	2	0	1	1	0	1	1	3
310	MALE	0.798421	Malay	15	RETIREE	RETIREE	RETIREE	RETIREE	NOT AVAILABLE	8000	M	DEG	DEG	NOT AVAILABLE	4	NO	NOT AVAILABLE	NO	NOT AVAILABLE	NO	NOT AVAILABLE	NO	NOT AVAILABLE	NOT AVAILABLE	2	1	1	1	3	2	0	1	0	1	0	2	3	0	2	1	1	0	0	2	0	3	2	3
315	MALE	0.469537	Malay	15	VETERINAR	GOVERNMENT SERVANT	BEAUTICIAN	PRIVATE STAFF	NOT AVAILABLE	8000	M	PG	DIP	NOT AVAILABLE	2	NO	NOT AVAILABLE	NO	NOT AVAILABLE	NO	NOT AVAILABLE	NO	NOT AVAILABLE	NOT AVAILABLE	1	1	3	0	2	3	0	2	0	1	0	1	3	0	3	3	3	0	1	0	0	3	2	2
373	MALE	0.572316	Chinese	14	PROGRAMMER	PRIVATE STAFF	TEACHER	GOVERNMENT SERVANT	NOT AVAILABLE	8000	M	DEG	DEG	NOT AVAILABLE	1	NO	NOT AVAILABLE	NO	NOT AVAILABLE	NO	NOT AVAILABLE	NO	NOT AVAILABLE	NOT AVAILABLE	0	2	1	2	0	3	3	2	1	0	3	2	1	0	2	0	3	2	0	1	1	0	3	1
398	MALE	0.500881	Malay	14	PILOT	PRIVATE STAFF	NOT AVAILABLE	NOT AVAILABLE	NOT AVAILABLE	8000	D	DEG	NOT AVAILABLE	NOT AVAILABLE	1	NO	NOT AVAILABLE	NO	NOT AVAILABLE	NO	NOT AVAILABLE	NO	NOT AVAILABLE	NOT AVAILABLE	0	2	2	0	3	2	0	2	0	3	0	0	2	0	3	2	3	0	0	0	0	3	2	1
43	FEMALE	0.695707	Chinese	14	MANAGER	PRIVATE STAFF	ACCOUNTANT	PRIVATE STAFF	NOT AVAILABLE	8500	M	DEG	DEG	NOT AVAILABLE	2	NO	NOT AVAILABLE	NO	NOT AVAILABLE	NO	NOT AVAILABLE	NO	NOT AVAILABLE	NOT AVAILABLE	1	0	2	0	3	1	0	3	0	1	0	0	3	1	3	3	3	0	1	0	0	2	3	2
255	MALE	0.87622	Malay	14	COUNCIL WORKER	GOVERNMENT SERVANT	TEACHER	GOVERNMENT SERVANT	NOT AVAILABLE	9000	S	NOT AVAILABLE	PG	NOT AVAILABLE	5	NO	NOT AVAILABLE	NO	NOT AVAILABLE	NO	NOT AVAILABLE	NO	NOT AVAILABLE	NOT AVAILABLE	2	1	2	0	3	2	0	2	1	1	1	0	3	1	3	3	3	1	0	0	1	3	2	3
390	MALE	0.489015	Malay	13	E-HAILING DRIVER	SELF-EMPLOYED	COMPANY WORKER	PRIVATE STAFF	NOT AVAILABLE	9000	M	DIP	DEG	NOT AVAILABLE	4	NO	NOT AVAILABLE	NO	NOT AVAILABLE	NO	NOT AVAILABLE	YES	MOTHER	DIABETES	0	1	1	2	0	2	2	0	2	0	3	3	0	0	0	0	0	2	0	3	2	3	0	0
331	FEMALE	0.820974	Malay	15	TEACHER	GOVERNMENT SERVANT	LECTURER	GOVERNMENT SERVANT	NOT AVAILABLE	9200	M	DEG	DEG	NOT AVAILABLE	3	NO	NOT AVAILABLE	NO	NOT AVAILABLE	NO	NOT AVAILABLE	YES	FATHER	HYPERTENSION	2	1	2	0	2	2	1	2	1	1	0	0	1	1	2	2	3	0	1	0	0	2	2	2
385	FEMALE	0.7NOT AVAILABLE44883747148	Malay	15	CLERK	GOVERNMENT SERVANT	TEACHER	GOVERNMENT SERVANT	NOT AVAILABLE	9500	M	DEG	DEG	NOT AVAILABLE	5	NO	NOT AVAILABLE	NO	NOT AVAILABLE	NO	NOT AVAILABLE	NO	NOT AVAILABLE	NOT AVAILABLE	1	1	3	0	3	2	0	3	0	3	0	2	2	2	3	2	3	0	0	0	0	3	2	3
247	FEMALE	0.967321	Malay	14	BANKER	PRIVATE STAFF	INSURANCE EXECUTIVE	PRIVATE STAFF	NOT AVAILABLE	9700	M	DEG	DEG	NOT AVAILABLE	4	NO	NOT AVAILABLE	NO	NOT AVAILABLE	NO	NOT AVAILABLE	NO	NOT AVAILABLE	NOT AVAILABLE	0	2	3	0	2	0	0	2	0	2	2	0	2	0	3	3	3	0	0	0	0	2	2	3
33	MALE	0.90347	Chinese	14	ENGINEER	PRIVATE STAFF	TEACHER	GOVERNMENT SERVANT	NOT AVAILABLE	10000	M	DEG	DEG	NOT AVAILABLE	3	NO	NOT AVAILABLE	NO	NOT AVAILABLE	NO	NOT AVAILABLE	NO	NOT AVAILABLE	NOT AVAILABLE	2	2	2	0	2	0	0	1	0	1	0	0	1	2	2	2	2	0	1	0	0	0	2	1
46	MALE	0.863671	Chinese	14	ENGINEER	PRIVATE STAFF	MANAGER	PRIVATE STAFF	NOT AVAILABLE	10000	M	DEG	DEG	NOT AVAILABLE	2	NO	NOT AVAILABLE	NO	NOT AVAILABLE	NO	NOT AVAILABLE	YES	SIBLINGS	G6PD	3	2	3	0	3	2	0	3	0	2	1	1	2	2	3	2	3	0	2	0	1	2	3	2
110	MALE	0.596584	Chinese	15	BUSSINESSMAN	BUSINESSMAN	NOT AVAILABLE	NOT AVAILABLE	NOT AVAILABLE	10000	M	DIP	SS	NOT AVAILABLE	1	NO	NOT AVAILABLE	NO	NOT AVAILABLE	NO	NOT AVAILABLE	NO	NOT AVAILABLE	NOT AVAILABLE	2	1	2	0	2	0	0	2	0	2	0	0	2	2	2	3	3	0	2	2	1	1	3	2
173	MALE	0.89653	Chinese	14	COMPANY MANAGER	PRIVATE STAFF	CASHIER	PRIVATE STAFF	DOCTOR	10000	M	SS	DIP	M	2	NO	NOT AVAILABLE	NO	NOT AVAILABLE	NO	NOT AVAILABLE	NO	NOT AVAILABLE	NOT AVAILABLE	1	2	0	3	1	2	0	2	1	3	0	0	0	0	99	2	2	0	1	0	0	3	1	2
197	MALE	0.527059	Malay	16	ENGINEER	PRIVATE STAFF	HOUSEWIFE	HOUSEWIFE	NOT AVAILABLE	10000	M	DIP	DIP	NOT AVAILABLE	3	NO	NOT AVAILABLE	NO	NOT AVAILABLE	NO	NOT AVAILABLE	NO	NOT AVAILABLE	NOT AVAILABLE	1	1	3	0	3	1	0	2	0	2	0	1	2	0	3	3	2	0	1	0	0	2	3	1
230	MALE	0.482767	Malay	13	MECHANIC	PRIVATE STAFF	LECTURER	GOVERNMENT SERVANT	NOT AVAILABLE	10000	M	DIP	DEG	NOT AVAILABLE	4	NO	NOT AVAILABLE	NO	NOT AVAILABLE	NO	NOT AVAILABLE	NO	NOT AVAILABLE	NOT AVAILABLE	2	3	3	0	1	0	0	3	0	3	0	0	2	1	3	3	3	0	1	0	0	0	3	3
275	FEMALE	0.618608	Malay	15	BANKER	PRIVATE STAFF	AUDITOR	PRIVATE STAFF	NOT AVAILABLE	10000	M	SS	DIP	NOT AVAILABLE	4	NO	NOT AVAILABLE	NO	NOT AVAILABLE	NO	NOT AVAILABLE	NO	NOT AVAILABLE	NOT AVAILABLE	0	2	1	0	2	2	0	2	0	1	0	1	2	0	1	1	2	0	1	0	0	1	2	3
292	MALE	0.880817	Malay	15	ARCHITECT	PRIVATE STAFF	HOUSEWIFE	HOUSEWIFE	NOT AVAILABLE	10000	M	DEG	DEG	NOT AVAILABLE	2	NO	NOT AVAILABLE	NO	NOT AVAILABLE	NO	NOT AVAILABLE	NO	NOT AVAILABLE	NOT AVAILABLE	0	0	2	0	3	1	0	2	0	1	0	0	2	0	3	3	2	0	0	0	2	0	3	2
389	MALE	0.878896	Malay	14	TECHNICIAN	PRIVATE STAFF	COMPANY WORKER	PRIVATE STAFF	NOT AVAILABLE	10000	M	DIP	DIP	NOT AVAILABLE	999	NO	NOT AVAILABLE	NO	NOT AVAILABLE	NO	NOT AVAILABLE	NO	NOT AVAILABLE	NOT AVAILABLE	1	1	2	0	3	1	0	2	0	2	0	0	1	0	2	2	3	0	0	0	1	2	3	3
309	MALE	0.967037	Malay	15	ENGINEER	PRIVATE STAFF	TEACHER	GOVERNMENT SERVANT	NOT AVAILABLE	10580	M	PG	DEG	NOT AVAILABLE	4	NO	NOT AVAILABLE	NO	NOT AVAILABLE	NO	NOT AVAILABLE	NO	NOT AVAILABLE	NOT AVAILABLE	2	1	3	0	3	3	0	1	0	1	0	1	0	0	3	3	3	3	2	1	0	3	2	2
146	FEMALE	0.968875	Chinese	16	CONTRACTOR	SELF-EMPLOYED	MANAGER	PRIVATE STAFF	NOT AVAILABLE	12000	M	SS	SS	NOT AVAILABLE	2	NO	NOT AVAILABLE	NO	NOT AVAILABLE	NO	NOT AVAILABLE	NO	NOT AVAILABLE	NOT AVAILABLE	1	2	1	1	3	2	1	2	0	2	1	0	1	1	2	1	2	0	0	1	0	2	2	2
200	MALE	0.492596	Chinese	16	EXECUTIVE	PRIVATE STAFF	TEACHER	GOVERNMENT SERVANT	NOT AVAILABLE	12000	M	DEG	PG	NOT AVAILABLE	3	NO	NOT AVAILABLE	NO	NOT AVAILABLE	NO	NOT AVAILABLE	NO	GRANDPARENTS	HYPERTENSION	3	2	3	2	3	3	2	3	2	3	2	3	3	2	3	3	3	2	2	1	0	2	3	3
265	MALE	0.474415	Malay	14	BANKER	PRIVATE STAFF	HOUSEWIFE	HOUSEWIFE	NOT AVAILABLE	12000	M	DEG	DEG	NOT AVAILABLE	4	NO	NOT AVAILABLE	NO	NOT AVAILABLE	NO	NOT AVAILABLE	NO	NOT AVAILABLE	NOT AVAILABLE	0	2	0	1	2	2	1	1	99	0	0	1	0	0	0	0	2	2	0	0	0	2	1	0
312	FEMALE	0.568879	Malay	15	EDUCATION OFFICER	GOVERNMENT SERVANT	BANKER	PRIVATE STAFF	NOT AVAILABLE	12000	M	DEG	DEG	NOT AVAILABLE	4	NO	NOT AVAILABLE	NO	NOT AVAILABLE	NO	NOT AVAILABLE	YES	FATHER	HYPERTENSION; DIABETES	1	1	3	0	3	1	0	2	0	1	0	0	0	1	2	1	3	0	1	1	0	1	3	3
343	MALE	0.886223	Malay	15	ARMY OFFICER	GOVERNMENT SERVANT	BANKER	PRIVATE STAFF	NOT AVAILABLE	12000	M	SS	DIP	NOT AVAILABLE	5	NO	NOT AVAILABLE	NO	NOT AVAILABLE	NO	NOT AVAILABLE	YES	GRANDMOTHER	HYPERTENSION	2	0	2	0	3	2	0	2	0	2	0	0	1	1	2	2	2	0	0	0	0	1	2	2
344	MALE	0.564221	Malay	15	ENGINEER	PRIVATE STAFF	HOUSEWIFE	HOUSEWIFE	NOT AVAILABLE	12000	M	DEG	DEG	NOT AVAILABLE	5	NO	NOT AVAILABLE	NO	NOT AVAILABLE	NO	NOT AVAILABLE	NO	NOT AVAILABLE	NOT AVAILABLE	1	3	3	0	3	2	1	3	1	3	0	0	3	1	3	3	3	0	0	0	0	3	2	3
350	FEMALE	0.924106	Malay	15	DIRECTOR PSDC	PRIVATE STAFF	TEACHER	GOVERNMENT SERVANT	NOT AVAILABLE	12000	M	DEG	DEG	NOT AVAILABLE	7	NO	NOT AVAILABLE	NO	NOT AVAILABLE	NO	NOT AVAILABLE	YES	MOTHER; BROTHER	DIABETES;HIV	1	1	3	0	3	2	0	2	0	2	0	1	2	1	3	3	3	0	1	0	0	2	2	2
382	FEMALE	0.638894	Malay	15	EXECUTIVE	PRIVATE STAFF	TEACHER	GOVERNMENT SERVANT	NOT AVAILABLE	12000	M	DEG	DEG	NOT AVAILABLE	7	NO	NOT AVAILABLE	NO	NOT AVAILABLE	NO	NOT AVAILABLE	YES	MOTHER;BROTEHR	HYPERTENSION,DIABETES;HIV	1	1	3	0	3	1	0	3	0	2	0	0	2	1	3	3	2	0	0	0	0	1	2	3
208	MALE	0.717227	Malay	16	TEACHER	GOVERNMENT SERVANT	LECTURER	GOVERNMENT SERVANT	NOT AVAILABLE	13000	M	DIP	DEG	NOT AVAILABLE	5	NO	NOT AVAILABLE	NO	NOT AVAILABLE	NO	NOT AVAILABLE	NO	NOT AVAILABLE	NOT AVAILABLE	0	1	2	0	2	2	0	2	0	2	0	99	1	1	2	2	3	0	0	0	0	1	1	2
211	FEMALE	0.609524	Malay	16	MANAGER	PRIVATE STAFF	CLERK	GOVERNMENT SERVANT	NOT AVAILABLE	13000	M	PG	DIP	NOT AVAILABLE	3	NO	NOT AVAILABLE	NO	NOT AVAILABLE	NO	NOT AVAILABLE	YES	FATHER	IHD	1	1	2	0	3	2	1	3	1	2	0	0	2	0	2	3	3	1	0	0	0	1	2	2
229	MALE	0.60505NOT AVAILABLE06511208	Malay	13	SELF-EMPLOYED	SELF-EMPLOYED	HOUSEWIFE	HOUSEWIFE	NOT AVAILABLE	13000	M	SS	SS	NOT AVAILABLE	3	NO	NOT AVAILABLE	NO	NOT AVAILABLE	NO	NOT AVAILABLE	NO	NOT AVAILABLE	NOT AVAILABLE	1	2	2	0	3	1	0	2	0	2	0	0	2	1	2	2	2	0	0	0	2	1	2	2
199	MALE	0.556526	Chinese	16	GOVERNMENT SERVANT	GOVERNMENT SERVANT	TEACHER	GOVERNMENT SERVANT	NOT AVAILABLE	14000	M	DIP	DEG	NOT AVAILABLE	3	NO	NOT AVAILABLE	NO	NOT AVAILABLE	NO	NOT AVAILABLE	NO	MOTHER	HYPERTENSION	2	3	3	3	1	3	3	3	2	0	2	3	0	3	3	2	3	1	0	0	3	3	3	3
381	FEMALE	0.4NOT AVAILABLE097351387779	Malay	15	BUSINESSMAN	BUSINESSMAN	TEACHER	GOVERNMENT SERVANT	NOT AVAILABLE	14000	M	DEG	PG	NOT AVAILABLE	2	NO	NOT AVAILABLE	NO	NOT AVAILABLE	NO	NOT AVAILABLE	NO	NOT AVAILABLE	NOT AVAILABLE	1	1	3	0	1	1	0	2	0	2	0	0	1	1	3	3	2	0	0	0	0	1	2	2
96	FEMALE	0.853839	Malay	15	SECURITY GUARD	PRIVATE STAFF	SECURITY GUARD	PRIVATE STAFF	NOT AVAILABLE	15000	D	SS	SS	NOT AVAILABLE	3	NO	NOT AVAILABLE	NO	NOT AVAILABLE	NO	NOT AVAILABLE	NO	NOT AVAILABLE	NOT AVAILABLE	1	2	2	0	2	1	0	1	0	1	2	0	2	0	3	3	3	0	1	0	0	1	2	2
227	MALE	0.736209	Malay	13	ENGINEER	PRIVATE STAFF	HOUSEWIFE	HOUSEWIFE	NOT AVAILABLE	15000	M	PG	DIP	NOT AVAILABLE	999	NO	NOT AVAILABLE	NO	NOT AVAILABLE	NO	NOT AVAILABLE	NO	NOT AVAILABLE	NOT AVAILABLE	1	1	2	0	2	1	0	2	1	2	0	1	1	1	2	2	2	0	1	1	0	2	2	1
257	FEMALE	0.658568	Malay	14	SELF-EMPLOYED	SELF-EMPLOYED	DOCTOR	GOVERNMENT SERVANT	NOT AVAILABLE	15000	M	DIP	PG	NOT AVAILABLE	1	NO	NOT AVAILABLE	NO	NOT AVAILABLE	NO	NOT AVAILABLE	NO	NOT AVAILABLE	NOT AVAILABLE	0	0	2	0	3	1	0	3	1	1	3	0	1	3	3	3	3	0	1	0	0	3	2	3
304	FEMALE	0.716571	Malay	15	OIL AND GAS MANAGER	PRIVATE STAFF	MANAGER	PRIVATE STAFF	NOT AVAILABLE	15000	M	PG	PG	NOT AVAILABLE	2	NO	NOT AVAILABLE	NO	NOT AVAILABLE	NO	NOT AVAILABLE	YES	GRANDMOTHER	DIABETES; HYPERTENSION	1	1	3	0	3	3	0	3	2	1	0	1	3	0	3	3	3	0	0	0	0	2	3	3
386	FEMALE	0.96673	Malay	15	GOVERNMENT SERVANT	GOVERNMENT SERVANT	TEACHER	GOVERNMENT SERVANT	NOT AVAILABLE	15000	M	DIP	DEG	NOT AVAILABLE	2	NO	NOT AVAILABLE	NO	NOT AVAILABLE	NO	NOT AVAILABLE	NO	NOT AVAILABLE	NOT AVAILABLE	1	2	3	1	2	2	0	3	1	1	0	2	1	2	2	2	2	0	0	0	0	3	2	3
57	MALE	0.494813	Malay	14	CONTRACTOR	SELF-EMPLOYED	TEACHER	GOVERNMENT SERVANT	NOT AVAILABLE	15500	M	DIP	SS	NOT AVAILABLE	2	NO	NOT AVAILABLE	NO	NOT AVAILABLE	NO	NOT AVAILABLE	NO	NOT AVAILABLE	NOT AVAILABLE	1	2	2	0	2	0	0	2	0	99	0	0	2	0	2	2	2	0	0	0	0	2	2	2
209	MALE	0.97716	Malay	16	LECTURER	GOVERNMENT SERVANT	TEACHER	GOVERNMENT SERVANT	NOT AVAILABLE	17000	D	PG	PG	NOT AVAILABLE	3	NO	NOT AVAILABLE	NO	NOT AVAILABLE	NO	NOT AVAILABLE	NO	NOT AVAILABLE	NOT AVAILABLE	0	1	2	2	2	3	0	1	3	3	2	2	1	0	2	1	1	2	0	2	2	3	2	0
223	FEMALE	0.622776	Malay	16	SELF-EMPLOYED	SELF-EMPLOYED	MANAGER	PRIVATE STAFF	NOT AVAILABLE	18000	M	DIP	DIP	NOT AVAILABLE	4	NO	NOT AVAILABLE	NO	NOT AVAILABLE	NO	NOT AVAILABLE	YES	FATHER	HYPERTENSION	3	2	3	0	2	1	0	3	1	2	2	0	2	1	3	3	3	0	1	0	0	1	3	3
313	MALE	0.48202337NOT AVAILABLE23137	Malay	15	IT OFFICER	PRIVATE STAFF	TEACHER	GOVERNMENT SERVANT	NOT AVAILABLE	20000	M	PG	DEG	NOT AVAILABLE	7	NO	NOT AVAILABLE	NO	NOT AVAILABLE	NO	NOT AVAILABLE	NO	NOT AVAILABLE	NOT AVAILABLE	1	0	3	0	3	1	1	2	0	1	0	1	0	1	1	2	2	0	0	0	0	1	1	2
340	MALE	0.715457	Malay	15	EDUCATION OFFICER	GOVERNMENT SERVANT	LECTURER	GOVERNMENT SERVANT	NOT AVAILABLE	20000	M	DEG	PG	NOT AVAILABLE	5	NO	NOT AVAILABLE	NO	NOT AVAILABLE	NO	NOT AVAILABLE	NO	NOT AVAILABLE	NOT AVAILABLE	0	1	2	0	3	3	1	2	1	2	0	1	2	0	3	2	3	0	0	0	1	2	2	2
342	MALE	0.488508	Malay	15	TEACHER	GOVERNMENT SERVANT	LECTURER	GOVERNMENT SERVANT	NOT AVAILABLE	20000	M	DEG	PG	NOT AVAILABLE	5	NO	NOT AVAILABLE	NO	NOT AVAILABLE	NO	NOT AVAILABLE	NO	NOT AVAILABLE	NOT AVAILABLE	1	2	3	1	1	2	1	2	1	3	1	0	3	0	3	1	2	1	0	1	2	3	2	1
271	MALE	0.877985	Indian	15	MANAGER	PRIVATE STAFF	INSURANCE EXECUTIVE	PRIVATE STAFF	NOT AVAILABLE	21000	M	PG	DEG	NOT AVAILABLE	4	NO	NOT AVAILABLE	NO	NOT AVAILABLE	NO	NOT AVAILABLE	NO	NOT AVAILABLE	NOT AVAILABLE	3	1	3	0	3	0	2	3	2	1	1	2	2	3	3	3	3	2	2	1	1	2	2	3
228	MALE	0.NOT AVAILABLE4355503909893	Malay	13	ENGINEER	PRIVATE STAFF	DOCTOR	GOVERNMENT SERVANT	NOT AVAILABLE	25000	M	DEG	PG	NOT AVAILABLE	2	NO	NOT AVAILABLE	NO	NOT AVAILABLE	NO	NOT AVAILABLE	NO	NOT AVAILABLE	NOT AVAILABLE	0	2	3	0	2	1	0	2	0	2	1	0	1	2	3	1	3	0	1	3	0	1	3	2
240	FEMALE	0.818794	Malay	13	PILOT	PRIVATE STAFF	HOUSEWIFE	HOUSEWIFE	NOT AVAILABLE	25000	M	DIP	SS	NOT AVAILABLE	7	NO	NOT AVAILABLE	NO	NOT AVAILABLE	NO	NOT AVAILABLE	YES	FATHER	NOT AVAILABLE	1	2	2	0	3	2	0	3	2	2	0	0	0	0	2	1	2	0	0	0	1	3	2	3
16	MALE	0.691657	Malay	16	BUSINESSMAN	BUSINESSMAN	HOUSEWIFE	HOUSEWIFE	NOT AVAILABLE	30000	M	SS	SS	NOT AVAILABLE	1	NO	NOT AVAILABLE	NO	NOT AVAILABLE	NO	NOT AVAILABLE	NO	NOT AVAILABLE	NOT AVAILABLE	3	0	3	0	3	3	0	2	0	3	0	1	3	0	3	3	3	0	0	0	1	3	3	3
195	MALE	0.587877	Malay	16	DOCTOR	GOVERNMENT SERVANT	HOUSEWIFE	HOUSEWIFE	NOT AVAILABLE	70000	M	PG	DEG	NOT AVAILABLE	5	NO	NOT AVAILABLE	NO	NOT AVAILABLE	NO	NOT AVAILABLE	NO	NOT AVAILABLE	NOT AVAILABLE	1	3	3	0	0	1	0	3	0	2	0	3	1	1	2	3	3	0	0	0	1	2	2	3

## Sheet: Suggestion1
Row Labels	Count of Occ_Father
SELF-EMPLOYED	15
NOT AVAILABLE	14
HAWKER	13
LORRY DRIVER	10
MECHANIC	9
TECHNICIAN	7
CLERK	5
SUPERVISOR	5
ENGINEER	5
SALESMAN	4
RETIREE	4
MANAGER	4
PENSIONER	4
CONTRACTOR	4
PASSED AWAY	4
LABORER	4
POLICEMAN	3
TEACHER	3
SECURITY GUARD	3
DRIVER	3
BUSINESSMAN	3
BUSSINESSMAN	3
LECTURER	2
UNEMPLOYED	2
BAUXITE MINER	2
BANKER	2
WELDER	2
EDUCATION OFFICER	2
VETERINAR	1
EXECUTIVE	1
ARCHITECT	1
JKR OFFICER	1
TOURIST GUIDE	1
JPJ OFFICER	1
BANK MANAGER	1
JUDGE	1
COMPANY WORKER	1
GENERAL WORKER	1
SOLDIER	1
ACCOUNTANT	1
GARDENER	1
GOVERNMENT SERVANT	1
PETRONAS EXECUTIVE	1
GRAB DRIVER	1
PUSPAKOM OFFICER	1
BLACKSMITH	1
RETIREE ARMY	1
SPORTS TRAINER	1
SALESREP	1
CUSTOMS OFFICER	1
ARTIST	1
TAXI DRIVER	1
INSURANCE AGENT	1
DEPUTY DIRECTOR	1
SURVEYOR	1
MEDICAL ASSISTANT	1
FARMER	1
MPK WORKER	1
TECHNICIAN	1
DOCTOR	1
TRACTOR DRIVER	1
OFFSHORE WORKER	1
USTAZ	1
CHEF	1
FISHMONGER	1
CLEANER	1
LAWYER	1
Grand Total	180

## Sheet: Suggestion2
Row Labels	Count of Monthly_income
3000	33
9	15
5000	15
2500	13
8000	11
4000	11
4500	11
10000	9
6000	9
12000	8
1500	7
2000	7
1000	6
3500	6
7000	6
15000	5
500	3
20000	3
13000	3
2800	3
3800	2
3100	2
9000	2
3600	2
1600	2
14000	2
2200	2
1200	2
25000	2
2600	1
1300	1
15500	1
5500	1
1700	1
900	1
4300	1
1800	1
18000	1
21000	1
9700	1
30000	1
10580	1
2700	1
3200	1
2778	1
1900	1
8500	1
17000	1
3900	1
4700	1
9200	1
9500	1
7050	1
70000	1
7500	1
7600	1
Grand Total	229
